# Supplementary material for: Regulation of nuclear transcription by mitochondrial RNA in endothelial cells
Source: eLife. 2024 Jan 22;13:e86204. doi: 10.7554/eLife.86204 (PMC10803041; doi:10.7554/eLife.86204)
Supplement: Supplementary file 1. [file elife-86204-supp1.xlsx]

## Sheet: RT-PCR primers
Target	Forward (5' - 3')	Reverse (5' - 3')
SncmtRNA	GGGGGTCTTAGCTTTGGCTCTCC	AAGGTGGAGTGGGTTTGGGGCTAGG
16S rRNA	TTTGCAAGGAGAGCCAAAGC	ATTTAGAGGGTTCTGTGGGC
b-Actin	CATGTACGTTGCTATCCAGGC	CTCCTTAATGTCACGCACGAT
ICAM1	GTGTCCTGTATGGCCCCCGACT	ACCTTGCGGGTGACCTCCCC
VCAM1	GTCAATGTTGCCCCCAGAGA	TTTTCGGAGCAGGAAAGCCC
DDX58	TGTGCTCCTACAGGTTGTGGA	CACTGGGATCTGATTCGCAAAA
eNOS	TGATGGCGAAGCGAGTGAAG	ACTCATCCATACACAGGACCC
MALAT1	GTGCTACACAGAAGTGGATTC	CCTCAGTCCTAGCTTCATCA
TUG1	CTGTGACCCAGAAGAGTTAAG	CATATCCCAGGGACTCAAAC
GAPDH	CTCCTCACAGTTGCCATGTA	GTTGAGCACAGGGTACTTTATTG

## Sheet: LNA GapmeRs
LNA GapmeR/Target	Sequence (5' - 3')
SncmtRNA (LNA-S1)	TTAGCCAAACCATTTA
SncmtRNA (LNA-S2)	AATTGGGTGTGAGGAG
SncmtRNA (LNA-S3)	TCCGTTGGTCAAGTTA
Scramble	AACACGTCTATACGC
