# Supplementary material for: Regulation of nuclear transcription by mitochondrial RNA in endothelial cells
Source: eLife. 2024 Jan 22;13:e86204. doi: 10.7554/eLife.86204 (PMC10803041; doi:10.7554/eLife.86204)
Supplement: Supplementary file 2. [file elife-86204-supp2.xlsx]

## Sheet: Bulk - Snc-KD in HT
gene_name	baseMean	log2FoldChange	lfcSE	stat	pvalue	padj
MX2	61.449	-3.35126	1.05178	8.81266	0.00299148	0.0872456
PAPPA2	44.1751	-3.06439	1.05028	7.61075	0.00580213	0.134341
CX3CL1	196.885	-2.3139	0.375606	35.7513	2.24179e-09	1.41539e-06
FAM155A	212.52	-2.16287	0.390105	28.9794	7.3152e-08	2.37171e-05
NEK11	59.1875	-2.13035	0.581703	12.8762	0.000332781	0.0210108
VCAM1	972.838	-2.08762	0.788456	6.4805	0.0109064	0.191487
CHSY3	179.704	-2.00398	0.345138	32.3686	1.27532e-08	6.1195e-06
CXCL11	247.348	-1.99635	0.36831	27.8373	1.3196e-07	3.76902e-05
EGOT	58.3554	-1.85577	0.506395	13.1214	0.000291937	0.0193271
MMP10	7813.95	-1.85317	0.154324	135.652	2.37804e-31	2.85269e-27
IGFBP7	4153.29	-1.80212	0.280695	38.8484	4.58019e-10	3.434e-07
SLC2A10	74.1403	-1.78965	0.574242	9.35543	0.00222325	0.0722769
SELE	3218.69	-1.73935	0.501719	11.3608	0.000750096	0.0370294
CXCL10	122.375	-1.73343	0.762826	4.90952	0.0267091	0.30958
PLA2G4C	1102.83	-1.70721	0.206516	65.3337	6.32318e-16	1.26421e-12
CFB	98.3326	-1.68145	0.584892	7.93482	0.00484926	0.119942
DHX58	136.124	-1.63046	0.68248	5.46002	0.0194564	0.26049
SLC15A3	59.0682	-1.62686	0.672651	5.64636	0.0174916	0.247149
MAGI2	54.4224	-1.62285	0.638416	6.27508	0.0122447	0.204577
PTGIS	43.0614	-1.62267	0.801987	3.95997	0.0465947	0.400148
STXBP5-AS1	69.6749	-1.61798	0.478001	11.1925	0.000821288	0.039567
GBP5	65.1271	-1.60402	0.456844	12.1053	0.000502789	0.0276784
LRP1	277.647	-1.58841	0.233049	45.5182	1.51229e-11	1.64922e-08
CTSK	1787.64	-1.56944	0.146749	110.209	8.81737e-26	5.28866e-22
UBE2L6	493.312	-1.56684	0.36832	17.3605	3.09186e-05	0.00358526
PSMB9	59.177	-1.55894	0.627888	5.97673	0.0144959	0.223512
ANO9	611.323	-1.55565	0.365839	17.3504	3.10826e-05	0.00358526
GPC5	55.2092	-1.49679	0.644503	5.24269	0.0220392	0.277363
UBD	351.154	-1.49504	0.385587	14.4931	0.000140671	0.0113254
PLCB4	125.621	-1.48473	0.416687	12.3691	0.000436492	0.025063
NAALADL2	60.5873	-1.47391	0.471138	9.64591	0.00189774	0.0669567
SAMD12	228.557	-1.46231	0.438538	10.7487	0.00104352	0.0460221
PTAFR	73.6349	-1.45906	0.621051	5.3595	0.0206097	0.269025
HLA-F	46.8831	-1.43894	0.684336	4.3057	0.037985	0.36443
PCDHGA4	37.8352	-1.42571	0.67329	4.40171	0.0359029	0.357233
PCDHGB7	263.023	-1.41952	0.27318	26.4132	2.75657e-07	7.18864e-05
RELN	5550.3	-1.41762	0.166873	69.5755	7.35456e-17	2.20563e-13
MAF	74.7236	-1.40015	0.497936	7.75163	0.00536642	0.127983
ALDH1A1	117.488	-1.39316	0.561352	5.97383	0.0145197	0.223592
NKX3-1	207.48	-1.36823	0.503657	7.15355	0.00748157	0.157338
EVC	1844.83	-1.3577	0.24493	29.7333	4.95751e-08	1.80213e-05
ABCA9	114.907	-1.35753	0.592615	5.09574	0.0239847	0.292101
RASA4	98.2204	-1.3278	0.449821	8.54327	0.00346803	0.0965255
TNFRSF9	542.634	-1.32083	0.406113	10.2607	0.00135894	0.0536247
ARHGEF40	198.03	-1.31089	0.302622	18.4309	1.76175e-05	0.00234392
PCDHGB5	250.736	-1.30621	0.325109	15.7808	7.11189e-05	0.00666518
APH1B	392.369	-1.29482	0.235575	29.6032	5.30177e-08	1.87059e-05
MAP2	63.709	-1.26047	0.559233	4.99026	0.0254905	0.303357
LOC107984862	48.3276	-1.25668	0.517075	5.83875	0.015677	0.231033
PHF21A	744.627	-1.2536	0.273162	20.5151	5.91615e-06	0.000972193
TBCK	335.998	-1.25099	0.251692	24.2365	8.52005e-07	0.0001881
WWC1	87.8286	-1.24064	0.498819	6.07494	0.0137113	0.216422
FAR2	1861.6	-1.23919	0.153419	63.6473	1.48814e-15	2.55025e-12
DDX58	2978.86	-1.23635	0.254724	22.8942	1.71166e-06	0.000342218
IL1R1	197.23	-1.23119	0.28484	18.4134	1.77807e-05	0.00234392
RASA4B	138.773	-1.22939	0.469926	6.70008	0.00964085	0.181272
BACH2	106.464	-1.22625	0.384944	10.0093	0.00155749	0.0591254
COPZ2	41.9085	-1.20885	0.574966	4.36176	0.0367544	0.359923
CTSF	133.014	-1.19938	0.387291	9.43545	0.00212831	0.0709658
RAB40B	77.0444	-1.19862	0.462548	6.61728	0.0100994	0.186963
THSD4	2663.68	-1.193	0.252595	21.7238	3.14863e-06	0.000572288
ST8SIA6	272.593	-1.19234	0.396413	8.83938	0.002948	0.0867302
ALPK1	120.556	-1.19114	0.447854	6.94675	0.00839717	0.168688
RGS20	111.07	-1.19043	0.387728	9.28643	0.00230858	0.0742459
OBSL1	130.722	-1.18673	0.498449	5.55546	0.0184231	0.252771
DDR1	74.9778	-1.18587	0.451365	6.80793	0.00907538	0.176162
ABCA6	292.821	-1.18229	0.41351	7.98383	0.00471971	0.118447
IFI35	291.824	-1.17735	0.505405	5.29376	0.0214019	0.273465
SOD2	11668.4	-1.17305	0.235968	24.0686	9.2965e-07	0.000199144
HMCN1	890.035	-1.17096	0.256402	20.3756	6.36368e-06	0.0010316
ADGRA3	1761.34	-1.15469	0.160951	50.3592	1.28028e-12	1.70647e-09
RABEPK	187.674	-1.15353	0.287533	15.8831	6.73786e-05	0.00646619
VNN1	145.745	-1.13938	0.405965	7.74254	0.00539348	0.128069
PRR16	88.6177	-1.13784	0.373933	9.17475	0.00245377	0.0775279
LOC100419583	343.954	-1.13364	0.438246	6.54077	0.010543	0.188663
PAM	3138.59	-1.13296	0.199263	31.5749	1.91891e-08	8.52565e-06
UNC93B1	122.436	-1.12764	0.473916	5.55411	0.0184374	0.252771
AFG1L	41.0414	-1.12268	0.542065	4.25519	0.0391305	0.368777
ANKRD26P1	736.495	-1.11201	0.257444	18.2749	1.91208e-05	0.00244015
RYK	1166.53	-1.11171	0.186877	34.7011	3.84424e-09	2.19597e-06
HFE	61.4881	-1.1115	0.466267	5.62789	0.0176769	0.248595
APOL3	647.187	-1.10826	0.321895	11.6007	0.000659275	0.0339428
PROS1	142.118	-1.10581	0.316138	12.1079	0.000502093	0.0276784
C1RL	120.575	-1.10256	0.404786	7.31668	0.00683174	0.148396
ST6GAL1	5202.04	-1.0977	0.274572	15.6179	7.75187e-05	0.00715319
FUCA1	135.879	-1.09571	0.440238	6.08957	0.0135982	0.21544
LOC105379171	206.496	-1.09521	0.348221	9.72297	0.00181979	0.0655562
FAM177B	44.5502	-1.09319	0.519117	4.39909	0.035958	0.357233
SNTB1	94.9358	-1.08949	0.379651	8.15376	0.0042972	0.112018
PPM1H	284.834	-1.08684	0.362411	8.83593	0.00295357	0.0867302
PATJ	95.1987	-1.08681	0.420942	6.5921	0.0102432	0.188279
SYNGR3	57.6947	-1.0863	0.486588	4.92836	0.0264194	0.307995
ADCY4	453.955	-1.08149	0.423174	6.39573	0.0114395	0.195399
MGP	69.0735	-1.07894	0.448677	5.71677	0.0168036	0.240257
ICAM1	26171.5	-1.07194	0.19977	28.1581	1.11797e-07	3.35278e-05
TLE4	503.044	-1.06399	0.199523	28.0415	1.18744e-07	3.47429e-05
SHC2	126.648	-1.05465	0.371279	7.97562	0.00474115	0.118497
LGALS9	506.439	-1.04883	0.406813	6.51467	0.0106988	0.190138
MAP3K7CL	99.3015	-1.04677	0.439978	5.5949	0.0180129	0.250948
IMMP2L	50.7568	-1.04468	0.491151	4.49182	0.0340573	0.350872
PIK3IP1	350.826	-1.03765	0.28062	13.4725	0.00024208	0.0170823
ZMAT1	101.025	-1.0362	0.379415	7.39131	0.00655398	0.145058
TMEM170B	83.9564	-1.03014	0.416552	6.06384	0.0137978	0.217215
TNKS	1671.62	-1.0298	0.144689	49.8384	1.66947e-12	2.0027e-09
CEBPD	54.2991	-1.02694	0.484336	4.46271	0.0346424	0.352194
ZNF704	373.903	-1.02446	0.237926	18.3067	1.88048e-05	0.00242562
LINC02310	53.4568	-1.02264	0.474512	4.6134	0.031723	0.340689
P4HA3	319.559	-1.00664	0.335941	8.83379	0.00295704	0.0867302
LINC00607	593.334	-1.00377	0.212878	21.911	2.85597e-06	0.000527412
TRPM4	275.486	-1.00258	0.281598	12.5159	0.000403507	0.0241244
TRANK1	823.17	-0.996657	0.235415	17.6287	2.685e-05	0.00325346
PLLP	106.667	-0.995109	0.373669	7.02656	0.00803093	0.164121
TMEM198B	84.9284	-0.992117	0.38856	6.47336	0.0109503	0.191487
NUTM2B-AS1	184.053	-0.984977	0.302669	10.4874	0.0012019	0.0493766
CTSO	195.098	-0.978258	0.26337	13.6807	0.000216674	0.0158489
C6orf58	115.082	-0.97702	0.447678	4.70841	0.0300153	0.330941
DNAH5	152.551	-0.975934	0.425856	5.17974	0.0228517	0.282608
EBI3	58.3244	-0.972568	0.493021	3.86277	0.0493689	0.4107
APLF	121.009	-0.970944	0.335964	8.2779	0.00401305	0.107237
MLLT3	221.17	-0.969632	0.337447	8.14334	0.00432197	0.112222
LOC102723996	790.403	-0.968475	0.322987	8.84449	0.00293975	0.0867302
CBLN3	79.309	-0.968045	0.414757	5.40407	0.0200899	0.265709
MTMR9LP	161.752	-0.966134	0.28891	11.0954	0.000865402	0.0409216
ADD3	3028.43	-0.962986	0.133578	51.1613	8.50786e-13	1.27575e-09
HDAC11	80.5657	-0.961984	0.416636	5.29106	0.0214352	0.273489
MRC2	711.911	-0.957429	0.217737	19.0687	1.26094e-05	0.00177955
TMOD2	71.3306	-0.956513	0.450369	4.4671	0.0345536	0.352194
SLC7A2	18167.9	-0.955776	0.212773	19.8224	8.49829e-06	0.00134139
TMCC2	162.82	-0.955585	0.356755	7.09889	0.00771317	0.160359
DHRS12	60.9545	-0.95387	0.470684	4.08019	0.0433888	0.386746
COLEC12	435.867	-0.953679	0.273151	12.0123	0.000528512	0.0286045
TNFSF18	773.156	-0.937917	0.323586	8.2695	0.00403166	0.107237
RDH10	746.015	-0.933692	0.315666	8.61214	0.00333931	0.0947005
IFT27	179.907	-0.933577	0.302521	9.43427	0.00212968	0.0709658
MIR1915HG	136.021	-0.930362	0.326317	8.06701	0.00450784	0.114326
SIRPB2	178.462	-0.925956	0.301231	9.36566	0.00221088	0.0720699
THBS3	235.686	-0.922975	0.314231	8.53729	0.00347943	0.0966187
PRKD1	169.708	-0.919406	0.289065	10.0393	0.00153237	0.0585425
HDAC9	837.517	-0.918433	0.218618	17.4171	3.0012e-05	0.00352964
ZC2HC1C	58.6613	-0.917001	0.460765	3.93673	0.0472426	0.401931
WHAMMP2	248.877	-0.916813	0.370392	6.04449	0.0139497	0.218461
PLCB1	663.342	-0.914734	0.200716	20.5273	5.87863e-06	0.000972193
CRACD	1325.17	-0.913709	0.227796	15.8548	6.83921e-05	0.00651136
FBXL13	229.741	-0.911779	0.406981	4.95853	0.0259622	0.306538
SDK1	116.643	-0.910779	0.424909	4.54247	0.0330639	0.3455
CD69	792.339	-0.910602	0.318069	8.07276	0.00449357	0.114326
CSF2	270.12	-0.909821	0.392954	5.28959	0.0214532	0.273489
CPE	155.915	-0.907674	0.43625	4.27902	0.0385855	0.367525
ZFHX2	120.58	-0.907662	0.322073	7.89181	0.00496593	0.122072
POU6F1	131.19	-0.90409	0.382441	5.53519	0.0186378	0.253204
THSD7A	193.156	-0.902026	0.319192	7.90421	0.004932	0.121487
CADM4	108.736	-0.897903	0.346943	6.64874	0.00992257	0.184545
RTKN	78.1654	-0.892028	0.411128	4.67561	0.0305938	0.333033
UBA7	351.912	-0.886954	0.386643	5.1894	0.022725	0.282004
MSI2	885.647	-0.886789	0.179173	24.2132	8.62413e-07	0.0001881
PTCHD4	435.365	-0.885944	0.193486	20.7947	5.11247e-06	0.000863791
NUTM2A-AS1	250.723	-0.878725	0.410806	4.51789	0.0335422	0.348676
LMLN	253.358	-0.875294	0.279851	9.69816	0.00184452	0.0660505
ABTB1	127.888	-0.866501	0.328035	6.92866	0.00848251	0.169594
SAMD9L	2778.45	-0.865657	0.296626	8.39441	0.00376377	0.102848
CFAP54	810.378	-0.865385	0.209492	16.8642	4.01528e-05	0.00430065
FBXL17	489.221	-0.863603	0.234857	13.3817	0.000254097	0.0176194
PCDHGA11	282.489	-0.863212	0.227437	14.303	0.000155618	0.0122013
GAA	225.554	-0.861356	0.259395	10.9416	0.000940306	0.042923
CCDC106	102.1	-0.859726	0.372541	5.29345	0.0214058	0.273465
IL4I1	685.978	-0.85461	0.181716	21.9098	2.85777e-06	0.000527412
ALDH6A1	82.4424	-0.841633	0.382394	4.81762	0.0281702	0.320528
PCDHGB4	166.227	-0.839943	0.375801	4.94879	0.0261089	0.307363
DHRS3	244.676	-0.83982	0.26741	9.77591	0.00176813	0.06408
MTR	1696.4	-0.838902	0.167945	24.6602	6.83824e-07	0.000160846
PARP10	457.238	-0.838659	0.390072	4.56292	0.0326713	0.343601
KIT	390.74	-0.837647	0.224453	13.8052	0.000202772	0.0150151
MAN2B2	710.561	-0.827702	0.218472	14.2033	0.000164079	0.0126297
LINC01215	185.915	-0.826082	0.348609	5.57137	0.0182565	0.252001
SMARCA1	1391.7	-0.825065	0.192488	18.163	2.02783e-05	0.00256062
LRP4	171.792	-0.824782	0.27955	8.65303	0.00326517	0.0937058
LOC105377297	100.888	-0.821184	0.380241	4.62768	0.03146	0.338774
EVI5L	197.635	-0.820408	0.410081	3.95837	0.046639	0.400148
C11orf49	211.369	-0.820203	0.250005	10.7022	0.00107006	0.0468323
EFEMP2	646.711	-0.819944	0.211079	14.9463	0.000110615	0.00922273
BBS9	325.155	-0.818287	0.302847	7.22791	0.00717785	0.154035
NIPAL2	385.488	-0.8181	0.2191	13.8305	0.000200067	0.0149069
MYO18A	475.45	-0.816209	0.325879	6.20132	0.0127655	0.209423
BBS1	190.776	-0.816134	0.313161	6.74119	0.00942116	0.179297
TCF7	109.295	-0.813978	0.384963	4.43269	0.0352569	0.355622
MEGF8	1363.23	-0.808804	0.19646	16.7632	4.23466e-05	0.00445605
ICA1L	113.418	-0.807963	0.387308	4.32235	0.0376149	0.363608
ADGRA2	255.288	-0.806885	0.257137	9.78134	0.00176291	0.06408
HEXD	145.929	-0.806885	0.330834	5.90046	0.015137	0.228406
SCN8A	1045.72	-0.806694	0.227592	12.4286	0.000422802	0.0247412
CLIP3	389.487	-0.80305	0.225076	12.6364	0.000378299	0.0232571
LOC105369958	571.345	-0.80085	0.382804	4.32555	0.0375442	0.363608
FBXO38	1088.28	-0.797539	0.155241	26.1601	3.14241e-07	7.69314e-05
GSAP	139.037	-0.797467	0.357926	4.92499	0.026471	0.308297
PTGFRN	975.687	-0.791477	0.159593	24.3828	7.89691e-07	0.000178738
RND1	486.695	-0.789205	0.298485	6.91554	0.00854497	0.169992
P2RX4	1390.68	-0.788832	0.282367	7.71652	0.00547179	0.129212
BCAS3	209.517	-0.787754	0.263163	8.91131	0.0028341	0.0855724
NIPSNAP1	533.534	-0.785093	0.186164	17.654	2.6496e-05	0.00324333
LTBP4	462.197	-0.783394	0.201017	15.0788	0.000103114	0.0087727
WHAMMP3	154.141	-0.783394	0.291341	7.19165	0.00732437	0.155972
TCTN1	132.937	-0.782608	0.364271	4.58949	0.0321686	0.341441
OSBP2	148.858	-0.780504	0.357535	4.7262	0.0297065	0.328643
SPAG16	113.752	-0.779933	0.341154	5.20363	0.0225398	0.280675
SLC66A3	268.721	-0.777617	0.245185	9.99181	0.00157238	0.0595025
ACP6	166.045	-0.776779	0.370373	4.36238	0.036741	0.359923
LTB	1871.92	-0.77499	0.129308	35.5873	2.43873e-09	1.46275e-06
HDAC6	357.715	-0.773001	0.232719	10.9581	0.000931969	0.042923
NACAD	200.207	-0.77298	0.286671	7.22434	0.00719218	0.154067
ROBO3	249.33	-0.77097	0.357756	4.60146	0.0319447	0.340933
IL18R1	414.366	-0.767647	0.313394	5.94173	0.0147865	0.225483
THEMIS2	127.444	-0.762235	0.351292	4.68025	0.0305113	0.333033
BST1	307.114	-0.760749	0.328653	5.30894	0.0212162	0.272791
JMJD1C	3152.18	-0.76028	0.164061	21.2516	4.02764e-06	0.000700225
PPP1R9A	203.514	-0.76012	0.300309	6.36258	0.0116552	0.197506
RALGAPA2	1500.08	-0.758539	0.178067	17.9679	2.24663e-05	0.00280735
SLCO5A1	3142.82	-0.756424	0.268394	7.8561	0.00506494	0.12306
LEPR	103.349	-0.753974	0.342583	4.82365	0.0280718	0.3198
IL17RC	148.445	-0.753408	0.30015	6.27263	0.0122617	0.204577
ETNK2	231.843	-0.752694	0.293335	6.5338	0.0105844	0.188663
CCDC136	143.636	-0.752259	0.349682	4.593	0.0321028	0.341441
PAN2	92.6971	-0.74847	0.369787	4.07621	0.0434912	0.386746
NBEA	432.975	-0.747642	0.211894	12.3684	0.00043666	0.025063
PLD1	2348.22	-0.746539	0.282166	6.92527	0.00849861	0.169633
RAI2	262.401	-0.745334	0.313216	5.61626	0.0177946	0.248792
SMPDL3A	180.243	-0.742686	0.292868	6.39988	0.0114128	0.195399
TNFAIP2	1024.3	-0.739998	0.336875	4.77589	0.0288609	0.322661
STAT2	1822.41	-0.739721	0.312526	5.54312	0.0185535	0.252977
PLTP	755.579	-0.738319	0.350126	4.40407	0.0358532	0.357233
MINAR1	104.816	-0.734314	0.357157	4.2055	0.0402931	0.375276
RASA1	1066.08	-0.731392	0.176133	17.1037	3.53924e-05	0.00391621
ABCA5	786.702	-0.731176	0.226428	10.3364	0.00130429	0.0527321
FCGRT	558.371	-0.730102	0.194763	13.9568	0.000187064	0.0142027
KIAA1324L	1117.13	-0.72774	0.204416	12.5602	0.000394043	0.0238735
IGF1R	2021.89	-0.727309	0.134957	28.8028	8.01343e-08	2.52971e-05
ABCD3	695.852	-0.72717	0.213294	11.5269	0.00068598	0.0350171
ERC2	161.859	-0.723721	0.31978	5.09104	0.0240497	0.292301
MAN2B1	1289.95	-0.723449	0.152675	22.2802	2.35624e-06	0.000463368
NCSTN	2000.1	-0.722069	0.17345	17.1717	3.41488e-05	0.00382849
GCA	150.062	-0.715341	0.357071	3.98967	0.0457802	0.395947
TMEM35B	181.857	-0.715198	0.323575	4.85645	0.027543	0.316974
CSF1	1604.29	-0.714132	0.32905	4.66427	0.0307965	0.334937
ANKIB1	2093.78	-0.712875	0.191717	13.6996	0.000214499	0.015786
NFIA	425.365	-0.712814	0.236127	9.04457	0.00263476	0.0808354
ARPIN	297.458	-0.712354	0.222564	10.1971	0.00140658	0.054962
USP40	598.383	-0.709012	0.204858	11.892	0.000563742	0.0301904
FOPNL	406.599	-0.703934	0.1949	12.9811	0.000314657	0.0202937
CCDC191	166.415	-0.701881	0.30884	5.14181	0.0233562	0.287071
ERMAP	157.978	-0.700559	0.317389	4.84806	0.0276772	0.31741
DOCK1	3315.32	-0.696925	0.183997	14.2172	0.000162871	0.0126297
TSHZ3	143.994	-0.695444	0.331127	4.39398	0.0360661	0.357233
NTM	1006.34	-0.694086	0.338013	4.17785	0.0409556	0.379092
ZNF862	300.716	-0.693116	0.282191	5.99129	0.0143767	0.222564
MAGED4	389.603	-0.692898	0.231766	8.888	0.00287051	0.0855724
SLC35C2	409.738	-0.692579	0.207151	11.1181	0.000854876	0.0407187
CYBRD1	947.512	-0.69187	0.265111	6.75597	0.00934347	0.178345
RBMS3	525.991	-0.69101	0.217613	10.0188	0.00154952	0.0590098
SEMA6C	454.753	-0.69024	0.187381	13.4961	0.000239063	0.0169692
MBD5	332.943	-0.689702	0.238537	8.30931	0.00394424	0.106826
TFB1M	302.956	-0.687212	0.230968	8.80964	0.00299643	0.0872456
ATP6V1A	4478.65	-0.686147	0.156014	19.1761	1.19197e-05	0.00170224
ADAM8	107.029	-0.68506	0.348785	3.84522	0.0498878	0.411592
HEMK1	145.295	-0.682938	0.322216	4.47625	0.0343691	0.351785
SMIM14	738.769	-0.679787	0.191871	12.473	0.000412883	0.0243988
AP1G2	112.185	-0.678053	0.342814	3.89993	0.0482882	0.406595
SESTD1	815.309	-0.678025	0.205415	10.8204	0.00100387	0.0446014
EPB41L1	146.511	-0.677117	0.318633	4.49257	0.0340425	0.350872
STARD9	434.475	-0.676609	0.245948	7.51864	0.00610639	0.137434
HID1	215.9	-0.674304	0.2725	6.08763	0.0136131	0.21544
YAE1	1476.33	-0.671753	0.152384	19.2998	1.11719e-05	0.00161468
ISG20	592.54	-0.669954	0.251833	7.02316	0.0080462	0.164154
RARB	1906.88	-0.666679	0.266859	6.18819	0.0128606	0.209586
TUSC3	1229.62	-0.666353	0.281991	5.53982	0.0185885	0.252987
CCL2	22651	-0.666197	0.101112	43.0413	5.35958e-11	5.35779e-08
HMGCL	240.306	-0.665968	0.251856	6.96486	0.00831259	0.168158
CEP112	310.583	-0.658245	0.216025	9.24289	0.00236411	0.0756366
MIR155HG	279.277	-0.657652	0.27413	5.72873	0.0166895	0.239291
DGLUCY	473.11	-0.656697	0.193028	11.5105	0.000692048	0.0351698
ENOX2	280.361	-0.65383	0.237905	7.5224	0.00609364	0.137405
PURG	163.69	-0.653078	0.309623	4.43097	0.0352924	0.355622
NLGN2	651.799	-0.651797	0.266777	5.92469	0.0149301	0.226002
NF1	2293.5	-0.650103	0.177242	13.3528	0.000258041	0.0176883
SRPX2	2199.71	-0.648807	0.217252	8.85094	0.00292938	0.0867302
RNF180	206.905	-0.643933	0.280926	5.23207	0.0221742	0.277953
CTBS	304.888	-0.640919	0.27546	5.38854	0.0202694	0.266586
BAIAP2-DT	315.886	-0.640475	0.230847	7.66742	0.00562269	0.131225
TRAF1	2702.26	-0.63911	0.182498	12.1743	0.000484533	0.027161
TFPI	6183.19	-0.637524	0.216519	8.60129	0.00335925	0.0949057
BCKDHB	214.682	-0.63715	0.250992	6.423	0.0112652	0.194722
DNPH1	156.568	-0.634284	0.289548	4.78476	0.0287127	0.321603
EPB41L5	700.177	-0.633848	0.22952	7.57534	0.00591723	0.135206
SAT1	10097.5	-0.633794	0.220275	8.21353	0.00415791	0.109248
GBP2	546.228	-0.63238	0.277075	5.17137	0.0229621	0.283388
PRKX	1121.44	-0.631103	0.286494	4.81619	0.0281935	0.320528
PCNX2	253.87	-0.630593	0.27942	5.07202	0.024315	0.294629
TSPYL4	601.937	-0.630228	0.190901	10.8467	0.00098971	0.0443006
TRPV4	205.752	-0.629518	0.319184	3.87215	0.0490935	0.409724
TMEM120A	355.923	-0.629128	0.275813	5.17448	0.022921	0.283172
TBC1D5	1080.83	-0.628206	0.209652	8.92261	0.00281661	0.0854533
ECHDC2	280.92	-0.627071	0.3154	3.92834	0.0474789	0.403432
MEGF6	989.737	-0.626167	0.160495	15.1411	9.97693e-05	0.00859853
ZBED6	1204.26	-0.624739	0.192736	10.4422	0.00123167	0.0502555
ME3	389.081	-0.623976	0.259075	5.76622	0.0163372	0.237133
PSEN2	526.644	-0.623681	0.256473	5.87509	0.0153566	0.229492
HIP1	1185.41	-0.623582	0.152346	16.6609	4.46933e-05	0.0046219
RANBP17	461.343	-0.6224	0.190547	10.6186	0.00111955	0.0480497
DNAJB5	166.571	-0.621021	0.283065	4.79485	0.028545	0.320528
OCLN	239.975	-0.619922	0.240025	6.64929	0.00991954	0.184545
STK3	281.024	-0.618308	0.236888	6.78435	0.00919605	0.177072
SH3TC1	1662.01	-0.617527	0.191494	10.3285	0.00130995	0.0527321
PDE5A	983.878	-0.617284	0.200869	9.38858	0.00218341	0.0716163
RASSF3	3012.86	-0.615551	0.176309	12.1045	0.000502991	0.0276784
C8orf82	138.648	-0.615086	0.304592	4.06597	0.0437556	0.388019
DNAJC4	178.3	-0.61262	0.286371	4.56238	0.0326816	0.343601
TAPBP	5355.31	-0.611813	0.197845	9.49397	0.00206148	0.0702542
CSGALNACT1	439.687	-0.611653	0.260388	5.48656	0.0191632	0.258294
PRCP	9079.22	-0.607561	0.107183	31.9109	1.61409e-08	7.44718e-06
PDCD4	761.417	-0.606981	0.219672	7.58785	0.00587628	0.134784
TLE2	299.197	-0.603777	0.269226	5.00779	0.0252335	0.301796
MYH10	2171.42	-0.602733	0.17038	12.4319	0.000422059	0.0247412
MIR3142HG	482.229	-0.601138	0.210057	8.15055	0.00430481	0.112018
DRP2	229.547	-0.600271	0.281261	4.53114	0.0332835	0.346889
MRPS6	252.935	-0.600032	0.259171	5.33752	0.0208711	0.271257
RECQL5	164.027	-0.598346	0.295818	4.0787	0.0434271	0.386746
SLC7A7	338.001	-0.594634	0.252565	5.52163	0.0187827	0.254309
NNT-AS1	204.01	-0.59435	0.273427	4.71039	0.0299808	0.330864
MPP4	332.544	-0.593449	0.237809	6.20507	0.0127385	0.209423
CFAP410	282.261	-0.592596	0.275726	4.60179	0.0319385	0.340933
KIF7	171.969	-0.592307	0.292215	4.09602	0.0429842	0.386672
ZNF362	228.516	-0.591899	0.248011	5.68008	0.0171586	0.243592
MAP3K1	1798.76	-0.59109	0.190529	9.56755	0.00198047	0.0684661
CHN1	651.728	-0.58578	0.229198	6.494	0.0108239	0.191487
SMIM29	191.476	-0.585757	0.284783	4.2158	0.0400492	0.374458
SLC37A1	354.818	-0.58499	0.215763	7.32277	0.00680864	0.148396
BGN	5662.68	-0.584848	0.223229	6.81924	0.00901808	0.17583
IRF1	616.119	-0.578457	0.196841	8.59569	0.0033696	0.0949057
HOMEZ	331.379	-0.578454	0.242701	5.65562	0.0173995	0.246138
MPV17	474.947	-0.577597	0.201841	8.15581	0.00429234	0.112018
HAPLN3	479.471	-0.573763	0.229587	6.21208	0.0126882	0.209423
CNKSR3	854.548	-0.573636	0.192437	8.84514	0.00293871	0.0867302
TNFSF10	610.049	-0.570763	0.288579	3.88735	0.0486512	0.407271
GALC	513.017	-0.570492	0.192896	8.71625	0.00315386	0.0909463
MMD	655.317	-0.568828	0.207564	7.4735	0.00626137	0.139872
SQOR	745.574	-0.566227	0.259544	4.73288	0.0295913	0.328252
TAP1	1257.48	-0.56616	0.239224	5.56706	0.0183014	0.252001
COL27A1	2498.69	-0.565711	0.255397	4.87612	0.0272308	0.314399
B3GLCT	945.736	-0.564082	0.215727	6.8	0.00911579	0.176376
RAI14	15334.6	-0.563256	0.107526	27.2741	1.76561e-07	4.92563e-05
PDGFD	225.089	-0.562736	0.267845	4.39589	0.0360257	0.357233
VPS13B	1562.68	-0.561595	0.172908	10.4946	0.00119722	0.0493766
PDSS2	348.785	-0.559521	0.213485	6.84907	0.00886874	0.173911
KLHL2	764.021	-0.55903	0.185811	9.0128	0.00268095	0.0820424
GLI3	527.695	-0.558552	0.17711	9.91354	0.00164067	0.0609334
FAM193A	712.469	-0.556546	0.19239	8.33366	0.00389173	0.105862
ATP11A	2220.21	-0.554384	0.194117	8.11009	0.00440195	0.113806
CERCAM	596.006	-0.554264	0.272865	4.10421	0.0427766	0.386407
DNASE2	699.631	-0.553182	0.214992	6.58829	0.0102651	0.188279
ZC2HC1A	507.824	-0.55219	0.191256	8.30897	0.00394497	0.106826
SGCE	583.313	-0.551884	0.174772	9.93194	0.00162435	0.0608929
DTNA	652.008	-0.550737	0.199389	7.59471	0.00585397	0.134784
CPT1C	275.654	-0.550282	0.269838	4.14524	0.0417517	0.382129
SERINC1	5600.4	-0.549866	0.134668	16.5797	4.66477e-05	0.00478279
PSMB8	439.475	-0.548221	0.243614	5.03835	0.0247921	0.2986
MAP3K4	559.025	-0.543814	0.177821	9.31775	0.00226945	0.0731836
PTPRK	15203.4	-0.541835	0.138902	15.1301	0.00010035	0.00859853
TMEM268	204.052	-0.541137	0.270619	3.98747	0.0458398	0.396125
GSN	657.273	-0.540906	0.199477	7.31812	0.0068263	0.148396
NAGLU	525.99	-0.540158	0.184734	8.52259	0.00350765	0.0969535
LIPA	544.664	-0.539888	0.259372	4.30942	0.0379019	0.36443
LTBP3	927.591	-0.537895	0.251249	4.55902	0.0327458	0.343696
SAMD14	329.044	-0.536938	0.230568	5.4044	0.0200861	0.265709
STK36	436.827	-0.535456	0.198525	7.25446	0.0070725	0.152319
DZIP1	1078.89	-0.53434	0.146175	13.312	0.000263715	0.017873
PARD3B	567.954	-0.533061	0.204694	6.75466	0.00935034	0.178345
PPM1K	439.669	-0.532916	0.248088	4.59124	0.0321358	0.341441
UBLCP1	724.05	-0.528872	0.159858	10.9083	0.00095736	0.0431982
NCOA7	6787.29	-0.528405	0.25461	4.28335	0.0384875	0.367525
PIGC	254.63	-0.527666	0.235737	4.99763	0.0253821	0.302667
ARMC9	1531.91	-0.526227	0.198299	7.00982	0.00810636	0.1651
ZC3H7B	11675.6	-0.525812	0.118289	19.6561	9.27058e-06	0.00142577
BMERB1	333.29	-0.525541	0.215313	5.94108	0.014792	0.225483
MYO6	6108.94	-0.522768	0.118265	19.4411	1.03752e-05	0.00154423
ZFP90	369.192	-0.522421	0.21804	5.72581	0.0167173	0.239309
TTC28	971.766	-0.522277	0.154055	11.4538	0.000713493	0.0356628
INTS6L	222.021	-0.522142	0.254103	4.21414	0.0400883	0.374532
PLA2G4A	1446.35	-0.521078	0.226654	5.25834	0.0218418	0.276678
CTSB	43898.7	-0.52086	0.0997311	27.1314	1.90088e-07	5.18248e-05
CWC27	560.375	-0.519286	0.190029	7.43877	0.00638334	0.142068
MAPK8	849.291	-0.514433	0.160033	10.2974	0.0013322	0.0530933
PPP1R26	387.209	-0.512271	0.206717	6.12289	0.0133443	0.213722
CDK19	364.086	-0.51179	0.20885	5.99104	0.0143787	0.222564
COL6A1	297.438	-0.511265	0.218123	5.47953	0.0192405	0.259023
EFNA1	2237.82	-0.51047	0.144125	12.4909	0.000408935	0.024285
FABP5	11047.1	-0.509808	0.198167	6.58482	0.0102852	0.188279
PDE6D	195.409	-0.507876	0.257208	3.89012	0.048571	0.407168
TTC1	1400.59	-0.507565	0.141116	12.8881	0.000330674	0.0210108
PDGFB	4061.56	-0.506638	0.149208	11.4761	0.000704977	0.0354537
EIF4E3	247.371	-0.506608	0.243438	4.32274	0.0376063	0.363608
TCIM	571.296	-0.506595	0.237921	4.51248	0.0336483	0.348696
GPR137B	497.484	-0.503694	0.205235	6.00583	0.0142587	0.221851
FAM198B-AS1	245.71	-0.503097	0.247392	4.12433	0.0422707	0.384151
ZER1	404.699	-0.501264	0.232012	4.65278	0.0310032	0.33621
LOC105378751	1457.94	-0.500908	0.235226	4.51393	0.0336199	0.348696
RASSF8	3281.9	0.501729	0.168971	8.77514	0.00305364	0.0884819
ZNF146	1822.32	0.502888	0.160186	9.81079	0.00173491	0.064037
MCM5	460.204	0.503446	0.209526	5.75235	0.0164666	0.237706
GLIPR1	1968.37	0.503528	0.127288	15.5827	7.89725e-05	0.00723171
SSR3	4405.37	0.504272	0.198468	6.42505	0.0112522	0.194722
TOMM40	939.852	0.505745	0.217294	5.39423	0.0202034	0.266379
CDC25A	322.145	0.506028	0.238729	4.47849	0.0343241	0.351624
ADGRL2	3273.27	0.507277	0.143606	12.4175	0.000425325	0.0247679
CYB5D1	461.845	0.508287	0.183334	7.66255	0.00563787	0.131324
CDH24	240.942	0.508381	0.257759	3.87397	0.0490405	0.409672
FEN1	614.586	0.508884	0.217134	5.46895	0.0193572	0.259451
PPDPF	504.248	0.508962	0.178911	8.0672	0.00450737	0.114326
IDI1	765.954	0.509213	0.215409	5.56546	0.0183182	0.252001
NUDT15	533.865	0.509318	0.220929	5.29631	0.0213707	0.273465
NOP58	1331.19	0.511241	0.191995	7.05748	0.00789349	0.162419
CSE1L	3351.31	0.511866	0.152428	11.2221	0.000808302	0.0393169
EFHD2	1963.52	0.512206	0.150666	11.503	0.000694835	0.0351698
H2AZ1	4147.41	0.513707	0.12618	16.4973	4.87205e-05	0.00495298
TRMU	481.381	0.515017	0.221833	5.3676	0.0205142	0.268362
FKBP5	494.494	0.517065	0.213571	5.84133	0.015654	0.231033
RFWD3	1152.35	0.518022	0.180324	8.21712	0.00414971	0.109248
C1orf115	1211.13	0.518742	0.155223	11.117	0.000855378	0.0407187
LAMA5	1909.87	0.519734	0.176323	8.64518	0.00327929	0.0937176
GINS1	208.225	0.52151	0.258406	4.05939	0.0439264	0.388027
CSRP1	5282.76	0.522547	0.111082	22.0199	2.69832e-06	0.000513795
SLC9A3R2	1881.55	0.523292	0.226291	5.31865	0.0210983	0.272791
CEP78	865.936	0.525395	0.149836	12.2479	0.000465788	0.0263566
SVIP	1184.94	0.525825	0.148361	12.5126	0.000404218	0.0241244
DBF4	395.61	0.526517	0.228694	5.27658	0.0216141	0.27473
TIMM21	347.148	0.526832	0.241818	4.72912	0.029656	0.328489
NDC1	701.276	0.528211	0.202403	6.7811	0.00921283	0.177111
LYAR	625.905	0.531529	0.198011	7.17461	0.00739424	0.156993
PLIN2	1472.65	0.532489	0.171996	9.5398	0.00201063	0.0692004
HSPD1	6160.06	0.535596	0.177592	9.04534	0.00263365	0.0808354
KIF11	551.788	0.536883	0.258485	4.29185	0.0382955	0.36605
SERPIND1	409.896	0.540135	0.204447	6.94985	0.00838262	0.168688
ICAM2	1581.54	0.540273	0.180647	8.89542	0.00285887	0.0855724
GLRX	283.378	0.541991	0.252658	4.57947	0.0323573	0.342291
CENPK	322.341	0.542741	0.273177	3.92569	0.0475536	0.403432
TRAF3IP2	325.849	0.543954	0.237116	5.23756	0.0221042	0.277366
PPM1D	560.226	0.544115	0.216329	6.29747	0.0120911	0.202859
PTTG1	385.326	0.544523	0.21254	6.53509	0.0105767	0.188663
NCEH1	2334.09	0.545585	0.198201	7.53329	0.00605691	0.137092
C4orf46	675.607	0.545618	0.210283	6.70177	0.00963173	0.181272
MCM3	1592.98	0.546343	0.17425	9.77642	0.00176765	0.06408
TUBB3	2233.77	0.547482	0.193715	7.94546	0.0048208	0.119484
C18orf54	425.442	0.5493	0.19435	7.95625	0.00479215	0.11902
CORO1C	8010.44	0.550836	0.113108	23.5827	1.19655e-06	0.00024748
PRICKLE1	983.173	0.553854	0.170233	10.5384	0.00116921	0.0490413
ADGRG6	1418.43	0.554204	0.177671	9.67703	0.00186586	0.0663885
LINC00472	282.482	0.556139	0.263964	4.41899	0.035541	0.355885
CALCRL	1572.74	0.556372	0.259537	4.57022	0.0325325	0.343538
CENPJ	424.204	0.557449	0.208947	7.08929	0.00775461	0.160942
CEP83	223.229	0.560546	0.259963	4.63037	0.0314107	0.338547
STOM	3604.25	0.561414	0.139802	16.0319	6.22845e-05	0.00607451
SUV39H2	323.823	0.563725	0.219767	6.55499	0.010459	0.188279
IER2	905.47	0.564226	0.163436	11.8688	0.000570837	0.0304345
MMRN2	4229.11	0.564981	0.28024	4.03867	0.0444689	0.388426
TPX2	1315.28	0.565106	0.154143	13.3688	0.000255839	0.0176382
UBASH3B	1137.38	0.567367	0.16628	11.5842	0.000665152	0.034099
SEMA3F	2677.93	0.569727	0.137527	17.064	3.61412e-05	0.00394136
GPATCH11	396.822	0.570657	0.236087	5.82	0.015845	0.232732
SOX18	590.375	0.570956	0.183007	9.68923	0.00185351	0.0661747
TIPARP	1356.49	0.570965	0.194599	8.56074	0.0034349	0.096049
LAPTM5	3090.8	0.571355	0.12357	21.2592	4.0118e-06	0.000700225
CUTC	295.683	0.572031	0.260497	4.79965	0.0284656	0.320528
TCF19	347.979	0.573967	0.242492	5.57207	0.0182492	0.252001
RASGRF2	991.495	0.574171	0.245011	5.45637	0.0194971	0.260744
GPRC5A	1837.93	0.574993	0.280876	4.16316	0.0413122	0.38077
CCDC77	202.038	0.577831	0.287861	4.0126	0.0451614	0.391725
HMGB2	620.664	0.581793	0.197902	8.59532	0.00337028	0.0949057
GLA	558.643	0.582248	0.259253	5.01706	0.0250988	0.300995
NQO1	4012.82	0.582765	0.131298	19.5829	9.63262e-06	0.00146269
RFC5	230.561	0.583139	0.289202	4.04473	0.0443096	0.388426
MELK	467.678	0.583812	0.220443	6.97833	0.00825024	0.167179
HES2	1340.59	0.584088	0.140344	17.2356	3.30196e-05	0.00373683
MIS12	441.917	0.587117	0.286087	4.19052	0.0406506	0.377142
CENPO	326.455	0.587693	0.243121	5.81222	0.0159152	0.232828
MGST1	768.072	0.588691	0.24815	5.59283	0.0180341	0.250948
SNRNP25	264.415	0.590287	0.238258	6.11257	0.0134224	0.214634
ITGA6	8476.16	0.593059	0.137069	18.5934	1.61778e-05	0.00218054
FLNC	6168.6	0.595201	0.131767	20.267	6.73509e-06	0.00107725
FOXM1	565.229	0.596546	0.212572	7.83237	0.00513186	0.123618
KIF23	557.423	0.598466	0.249923	5.69655	0.0169983	0.241602
GFOD1	234.657	0.600548	0.265631	5.08316	0.0241593	0.293335
COQ2	352.075	0.606957	0.203117	8.89091	0.00286595	0.0855724
RTTN	272.246	0.608206	0.232807	6.79564	0.00913807	0.176512
MEDAG	580.144	0.609242	0.186773	10.5918	0.0011359	0.0483201
TNFRSF10A	712.578	0.611353	0.189262	10.3736	0.00127829	0.0519809
TACC3	434.234	0.612203	0.193323	9.98111	0.00158154	0.0596609
ECT2	1454.94	0.612563	0.13751	19.727	8.93303e-06	0.0013917
USP54	631.033	0.612667	0.254243	5.77151	0.016288	0.237125
KRT18	1841.01	0.616296	0.175687	12.2183	0.000473236	0.0266523
CD274	968.843	0.617554	0.27031	5.18531	0.0227786	0.282004
LRRC8B	608.407	0.619996	0.167911	13.5714	0.000229656	0.0166515
SLIT2	2775.99	0.620689	0.270133	5.2394	0.0220809	0.277363
LDHA	11998.6	0.621217	0.151148	16.7648	4.23108e-05	0.00445605
HLX	281.739	0.629059	0.287482	4.75678	0.0291832	0.32445
HAUS6	975.913	0.630195	0.184168	11.6309	0.000648637	0.033691
FAM124B	1117.35	0.630268	0.187556	11.2117	0.00081282	0.0393169
INPP1	356.141	0.632793	0.206672	9.32723	0.00225773	0.0730021
ECI2	672.059	0.633268	0.314003	4.03543	0.0445543	0.388426
INTS13	1064.04	0.637421	0.150608	17.8041	2.44861e-05	0.00302819
TUBB4B	3555.94	0.63901	0.12413	26.3127	2.90368e-07	7.41119e-05
PDSS1	152.772	0.63902	0.31895	3.99216	0.0457125	0.395933
SLC25A10	136.589	0.639813	0.318525	4.01295	0.0451522	0.391725
ZWINT	344.554	0.639814	0.227971	7.83623	0.00512094	0.123603
FSD1L	265.623	0.640685	0.257089	6.18491	0.0128844	0.209586
IQGAP3	338.596	0.641343	0.270812	5.57709	0.0181969	0.252001
SMTN	2499.18	0.642857	0.125035	26.2518	2.99681e-07	7.48952e-05
PARPBP	135.602	0.648858	0.329265	3.86921	0.0491797	0.409724
BRCA2	312.777	0.656081	0.242715	7.26907	0.00701522	0.151357
CKS2	724.926	0.657148	0.197735	10.9652	0.000928379	0.042923
HTR1B	206.646	0.657951	0.310253	4.46398	0.0346167	0.352194
KIF14	348.374	0.660934	0.231064	8.13084	0.00435185	0.112753
SGO2	384.392	0.661645	0.251211	6.88842	0.00867557	0.171171
PANX2	131.572	0.663624	0.306218	4.67629	0.0305818	0.333033
TMPO	1558.75	0.666074	0.19709	11.3284	0.000763305	0.0373739
STIL	427.2	0.668013	0.260961	6.50898	0.0107331	0.190465
TRIB3	859.049	0.669086	0.279253	5.69841	0.0169803	0.241602
SMC4	2200.51	0.67092	0.190214	12.3375	0.000443941	0.0253596
ERRFI1	995.164	0.671799	0.175021	14.6236	0.000131261	0.0106392
PRR11	1141.55	0.67435	0.174704	14.7821	0.000120679	0.00991548
NUSAP1	460.116	0.676484	0.251657	7.16702	0.00742559	0.157066
CHAF1A	318.72	0.676929	0.260594	6.70405	0.00961939	0.181272
MDK	1172.26	0.678784	0.266342	6.43917	0.0111631	0.193964
MGST2	344.067	0.679613	0.275087	6.05947	0.013832	0.217468
BIRC5	291.583	0.685961	0.280989	5.91519	0.0150108	0.226789
STK17B	314.788	0.686118	0.214455	10.1819	0.00141826	0.0550595
PRR29	586.478	0.688022	0.222188	9.51021	0.00204331	0.0698336
NUP35	228.983	0.689233	0.246867	7.75838	0.0053464	0.12776
MED26	197.46	0.691722	0.347877	3.92722	0.0475104	0.403432
CYP51A1	869.999	0.695176	0.281376	6.05485	0.0138682	0.217543
SMYD2	461.988	0.699549	0.308667	5.09658	0.0239731	0.292101
KIF20A	326.145	0.703666	0.252301	7.71753	0.00546871	0.129212
SLC4A8	453.586	0.703887	0.282642	6.14689	0.0131644	0.212258
RPL22L1	413.883	0.704524	0.220069	10.1852	0.00141576	0.0550595
MCM8	325.35	0.707796	0.213454	10.9401	0.000941042	0.042923
HSPA4L	730.406	0.708748	0.272332	6.71783	0.00954537	0.180895
PRC1	687.417	0.709124	0.21801	10.4928	0.00119838	0.0493766
ATAD2	667.962	0.712519	0.213058	11.0932	0.000866464	0.0409216
SPAG5	395.82	0.715616	0.278652	6.53876	0.0105549	0.188663
EBP	278.593	0.7176	0.244891	8.52885	0.0034956	0.0968435
NCAPG2	658.393	0.719812	0.206532	12.044	0.000519604	0.0284619
MAD2L1	307.684	0.720788	0.286034	6.29795	0.0120878	0.202859
SOCS3	467.132	0.722822	0.328913	4.78116	0.0287727	0.321975
SULT1B1	3561.96	0.725528	0.133991	29.0435	7.07729e-08	2.35831e-05
ACER2	166.519	0.726641	0.296522	5.9681	0.014567	0.224033
NRGN	238.722	0.727635	0.295492	6.01289	0.0142018	0.221253
DNAJC9	251.805	0.730496	0.255949	8.09278	0.00444419	0.113915
BUB1	352.558	0.730594	0.227771	10.2127	0.00139475	0.0546777
GRPEL2	1820.06	0.731788	0.185145	15.4687	8.38812e-05	0.00745362
PAQR3	1757.34	0.732174	0.145017	25.2727	4.97704e-07	0.000119409
CEP55	497.438	0.732354	0.216264	11.3705	0.000746211	0.0369899
ADAMTS9	1374.01	0.732882	0.184086	15.6972	7.43345e-05	0.00691253
ORC6	188.035	0.733183	0.316359	5.32695	0.0209981	0.272317
RAD18	333.545	0.735449	0.24117	9.23286	0.00237711	0.0758398
DLEU1	135.573	0.736409	0.318967	5.30137	0.0213086	0.273465
CKS1B	244.721	0.737645	0.282741	6.7584	0.00933072	0.178345
NEB	237.248	0.739203	0.237989	9.59339	0.00195279	0.0684661
CCNB1	794.728	0.739777	0.193845	14.4365	0.000144963	0.0115932
POLQ	174.481	0.741494	0.329911	5.01585	0.0251163	0.300995
ESPL1	202.454	0.748389	0.301491	6.1083	0.0134549	0.214634
STEAP1	260.357	0.749499	0.246682	9.16252	0.00247023	0.0777765
ARHGAP11A	444.918	0.750361	0.308304	5.86731	0.0154246	0.230141
CDK1	395.093	0.753529	0.267201	7.88424	0.00498674	0.122148
BRIP1	216.752	0.75385	0.34397	4.76108	0.0291103	0.32445
NTSR1	133.429	0.756144	0.304069	6.15153	0.0131298	0.211986
PHLDA1	5109.72	0.756365	0.153904	23.8912	1.01936e-06	0.000214531
GINS4	178.539	0.756725	0.273993	7.58872	0.00587346	0.134784
RPS6KL1	383.42	0.757002	0.243777	9.57591	0.00197147	0.0684661
CDCA2	235.594	0.766356	0.30367	6.3101	0.0120052	0.201983
TYMS	210.083	0.767401	0.342464	4.97675	0.0256903	0.304827
LPXN	2341.96	0.767958	0.223674	11.6624	0.000637744	0.0335543
GGT5	99.1849	0.769456	0.349355	4.82406	0.0280651	0.3198
ARHGEF26	162.704	0.772381	0.381789	4.0495	0.0441844	0.388426
FAM117B	202.433	0.773042	0.312022	6.10045	0.0135147	0.214763
ATAD5	182.042	0.776651	0.29803	6.7393	0.00943116	0.179297
KIF18B	113.335	0.776941	0.38518	4.04298	0.0443554	0.388426
CCNA2	359.216	0.777321	0.241018	10.3181	0.00131732	0.0527436
KCTD12	9677.03	0.778209	0.192062	16.2243	5.62675e-05	0.00556367
HASPIN	93.2142	0.780824	0.377925	4.23736	0.0395435	0.371844
SIPA1L2	735.967	0.783017	0.219366	12.6186	0.000381932	0.0232571
PIK3R1	1139.02	0.783391	0.190623	16.7199	4.33243e-05	0.00451929
KIFC1	231.155	0.786799	0.266571	8.64411	0.00328121	0.0937176
HMMR	200.371	0.795427	0.3535	5.02135	0.0250367	0.300641
BAG2	137.988	0.796314	0.337093	5.54651	0.0185176	0.252977
MYBL2	366.395	0.798654	0.26965	8.68069	0.003216	0.0925158
TK1	110.922	0.799753	0.380706	4.38587	0.0362379	0.357775
PBK	219.766	0.800426	0.29765	7.16428	0.00743695	0.157066
MYCL	195.892	0.801601	0.32235	6.13334	0.0132656	0.213237
KIF4A	323.558	0.806566	0.256589	9.78432	0.00176006	0.06408
ING2	169.603	0.808494	0.350167	5.27617	0.0216193	0.27473
FRMD3	165.654	0.80906	0.399459	4.05351	0.0440796	0.388426
KIF2C	211.245	0.812542	0.310764	6.76757	0.0092829	0.178172
DEPDC1	352.633	0.814596	0.249162	10.5795	0.00114351	0.0483622
CENPF	2324.7	0.816096	0.147833	30.1179	4.06552e-08	1.52406e-05
NCAPH	172.927	0.818937	0.350825	5.39491	0.0201956	0.266379
TTK	206.109	0.829461	0.294291	7.86688	0.00503484	0.12276
NT5E	1874.74	0.830049	0.166688	24.4988	7.43557e-07	0.000171533
CDCA5	180.024	0.831643	0.322745	6.57062	0.0103676	0.188279
KIF20B	525.732	0.833071	0.265272	9.74643	0.00179672	0.0649199
NDRG1	1491.43	0.835469	0.142717	33.9087	5.77601e-09	3.1495e-06
DUSP4	1365.55	0.835937	0.21617	14.7659	0.000121717	0.0099328
DTL	344.852	0.838709	0.254735	10.7333	0.00105225	0.0462373
DEPP1	1010.03	0.845237	0.24801	11.4724	0.000706355	0.0354537
PLK4	230.927	0.846533	0.282516	8.90157	0.00284926	0.0855724
MCM4	1128.99	0.846556	0.225694	13.8908	0.000193747	0.0145262
ASF1B	101.77	0.847215	0.426878	3.89947	0.0483013	0.406595
HJURP	271.91	0.855734	0.318773	7.12825	0.00758787	0.158028
RNF152	913.215	0.860243	0.204815	17.4305	2.98003e-05	0.00352964
FAM83D	202.727	0.860267	0.352369	5.88679	0.0152549	0.229034
KNL1	593.972	0.861136	0.194293	19.4315	1.04271e-05	0.00154423
AURKB	147.535	0.863939	0.343329	6.26747	0.0122974	0.204605
NCAPG	576.727	0.86418	0.267371	10.3157	0.00131903	0.0527436
FAM210A	583.16	0.86429	0.237317	13.1076	0.000294097	0.0193271
DEPDC1B	93.3913	0.867754	0.374097	5.34857	0.0207393	0.270422
SMAD6	557.166	0.871364	0.264945	10.6827	0.00108144	0.0469115
TIMP1	722.222	0.871774	0.281671	9.44602	0.00211607	0.0709658
HMGN2	1100.06	0.873566	0.220364	15.5125	8.1962e-05	0.00733744
PCDH12	848.648	0.87476	0.27178	10.2206	0.00138877	0.0546219
SCD	3458.1	0.87736	0.22287	15.2755	9.29125e-05	0.00813561
NDC80	179.481	0.8842	0.34554	6.47719	0.0109268	0.191487
ASPM	891.989	0.884438	0.187077	22.0713	2.62706e-06	0.000508294
TRIP13	358.24	0.88468	0.227395	14.9828	0.000108496	0.00916563
PCLAF	211.553	0.884816	0.310338	8.0429	0.00456824	0.115613
FAM111B	210.843	0.891432	0.388263	5.20534	0.0225176	0.280675
EFNB2	768.713	0.894122	0.26279	11.4176	0.000727524	0.0362132
CLSPN	629.405	0.894698	0.273578	10.5525	0.00116032	0.0488394
AURKA	449.799	0.894884	0.298121	8.88877	0.0028693	0.0855724
LIMA1	2640.01	0.89511	0.225409	15.53	8.12077e-05	0.00732456
MKI67	2363.48	0.897423	0.206259	18.6477	1.57236e-05	0.00214342
CENPI	280.494	0.899386	0.230086	15.1375	9.99598e-05	0.00859853
NEK2	103.088	0.902357	0.390717	5.28382	0.0215245	0.274106
LINC00622	169.37	0.906285	0.391752	5.29914	0.021336	0.273465
ACAT2	236.544	0.908755	0.250414	13.0562	0.000302286	0.0196012
XRCC2	109.15	0.910972	0.374337	5.87447	0.015362	0.229492
CKAP2L	306.939	0.915875	0.262719	12.0093	0.00052936	0.0286045
TOX2	268.918	0.92013	0.229451	15.9345	6.55724e-05	0.0063436
C19orf48	235.537	0.920194	0.308686	8.78593	0.00303563	0.0881729
PLP2	941.925	0.920715	0.170886	28.6631	8.61295e-08	2.64926e-05
BUB1B	314.65	0.925355	0.256228	12.883	0.000331578	0.0210108
NUF2	147.42	0.926934	0.370196	6.19485	0.0128123	0.209423
TRIB2	200.266	0.930597	0.257709	12.9277	0.00032375	0.0207685
PLK1	380.629	0.931913	0.253497	13.3342	0.000260607	0.0177627
GTSE1	311.694	0.94243	0.305158	9.39923	0.00217077	0.0716163
RSPO3	156.594	0.944373	0.341534	7.54909	0.00600404	0.136669
ORC1	99.2875	0.944437	0.416231	5.09399	0.024009	0.292101
SNHG1	708.513	0.946393	0.26232	12.8266	0.000341732	0.0213511
RRM2	806.95	0.946479	0.251715	13.916	0.000191167	0.0144229
EXOC3L1	60.9691	0.950168	0.466659	4.10854	0.0426672	0.386
TM4SF18	894.59	0.952203	0.275567	11.7402	0.000611656	0.0324665
RAB3B	6163.5	0.95286	0.154193	37.5379	8.96554e-10	6.32651e-07
GPRIN3	168.28	0.964384	0.392636	5.94901	0.0147255	0.225483
CDCA8	230.207	0.970243	0.266502	13.1026	0.000294879	0.0193271
KLF4	89.9038	0.97674	0.466378	4.34324	0.0371561	0.362527
RGS4	3215.14	0.978048	0.243852	15.8014	7.03512e-05	0.00664514
TOP2A	1401.67	0.98475	0.221631	19.4004	1.05983e-05	0.00155045
KIF18A	169.711	0.986476	0.302951	10.4879	0.00120161	0.0493766
C15orf62	52.8821	0.987876	0.49986	3.86909	0.0491833	0.409724
KCNJ2	601.552	0.990674	0.229483	18.3376	1.85022e-05	0.00241253
ANLN	1546.17	0.992831	0.190613	26.6666	2.41768e-07	6.44499e-05
RACGAP1	354.127	0.994812	0.260662	14.3571	0.000151206	0.0120124
PIK3CG	293.163	1.0039	0.278792	12.7675	0.000352701	0.0218093
DLGAP5	737.919	1.00419	0.239243	17.3128	3.17047e-05	0.00362219
THSD1	837.841	1.0061	0.206372	23.3836	1.32705e-06	0.000269819
MYBL1	238.364	1.00664	0.330665	9.13862	0.00250269	0.0783872
CENPV	68.5849	1.00718	0.493325	4.1072	0.0427011	0.386015
ATF3	416.29	1.01101	0.303658	10.9092	0.000956858	0.0431982
CENPE	977.399	1.02023	0.220086	21.1012	4.35659e-06	0.000746595
ADAMTS4	1443.63	1.02401	0.234286	18.7398	1.49819e-05	0.00206579
P2RY2	117.64	1.02415	0.449853	5.09894	0.0239405	0.292101
SKA3	173.309	1.03133	0.334093	9.39753	0.00217278	0.0716163
SMAGP	236.709	1.03502	0.286445	12.8591	0.00033585	0.0210935
CPAMD8	85.8568	1.03503	0.454654	5.11599	0.0237063	0.289678
LOC105378858	86.7898	1.03851	0.403426	6.55626	0.0104516	0.188279
P2RY1	122.105	1.04978	0.454861	5.24805	0.0219714	0.277239
DDIT4L	490.493	1.05709	0.258499	16.4366	5.03051e-05	0.00507109
SPC25	66.0663	1.06192	0.447544	5.56065	0.0183686	0.252406
UBE2C	202.192	1.0662	0.341765	9.57257	0.00197506	0.0684661
ERCC6L	113.405	1.07666	0.371718	8.28087	0.00400648	0.107237
LMO7	2025.56	1.08358	0.175533	37.3269	9.98959e-10	6.65751e-07
CDC6	365.285	1.08555	0.272845	15.5569	8.00601e-05	0.00727576
SHCBP1	407.939	1.10019	0.270256	16.2585	5.52615e-05	0.00552431
LFNG	78.9611	1.10235	0.433366	6.39562	0.0114402	0.195399
ODC1	2676.33	1.11768	0.286847	14.8318	0.000117539	0.00972414
PTPN22	102.66	1.12458	0.434777	6.56692	0.0103891	0.188279
SKA1	110.211	1.12593	0.364722	9.40363	0.00216556	0.0716163
AHR	952.57	1.13244	0.202874	30.5215	3.30182e-08	1.2777e-05
PSMC3IP	60.229	1.13934	0.446691	6.4323	0.0112064	0.194265
CDC25C	56.3043	1.14815	0.467796	5.9493	0.0147231	0.225483
CDCP1	580.371	1.14818	0.176703	41.5468	1.15083e-10	9.86096e-08
DLL4	264.406	1.15983	0.368087	9.70301	0.00183966	0.0660505
CDC20	391.398	1.16091	0.293668	15.2979	9.18177e-05	0.00809886
DHCR24	1536.7	1.16516	0.136579	71.3157	3.04404e-17	1.21721e-13
HSD3BP4	84.4836	1.16622	0.454872	6.47482	0.0109413	0.191487
RFC3	257.53	1.17662	0.388928	8.95638	0.00276502	0.0844
DUSP5	391.045	1.18312	0.205218	32.7036	1.07338e-08	5.56367e-06
ACE	89.9774	1.18536	0.442123	7.06176	0.00787466	0.16231
ADAMTS1	588.561	1.1921	0.21812	29.2319	6.42122e-08	2.20083e-05
RIN1	62.0365	1.21643	0.475464	6.43762	0.0111728	0.193964
SEMA7A	161.471	1.22295	0.50222	5.77652	0.0162416	0.236737
FAS	152.536	1.25251	0.414197	8.91984	0.0028209	0.0854533
FMN1	50.9091	1.26876	0.530254	5.63615	0.0175938	0.247717
STC1	1287.49	1.28339	0.153443	68.2487	1.44119e-16	3.4577e-13
INKA2	267.353	1.2968	0.375026	11.6427	0.000644564	0.033691
TMEM88	42.1852	1.31094	0.598635	4.69744	0.0302076	0.331841
KLF2	221.261	1.35101	0.308119	18.7686	1.4758e-05	0.00205857
KRT19	60.2338	1.35421	0.658419	4.11237	0.0425707	0.385516
PCDH9	351.871	1.36999	0.23714	32.633	1.11311e-08	5.56367e-06
THBD	108.562	1.3762	0.41741	10.6153	0.00112153	0.0480497
UNC5B	110.826	1.50227	0.5804	6.44969	0.0110972	0.193491
LOC105376374	45.354	1.5075	0.547468	7.44513	0.00636084	0.14183
ZNF114	175.329	1.5225	0.396016	14.3111	0.000154951	0.0122013
LRRC4	42.9429	1.57572	0.544801	8.2287	0.00412331	0.10895
DPP4	210.367	1.62271	0.463496	11.7307	0.00061477	0.032488
MALL	112.635	1.62466	0.713579	4.95253	0.0260526	0.30719
PCDH17	93.6211	1.70962	0.418202	16.2137	5.65828e-05	0.00556367
PRDM1	209.992	1.79769	0.42026	17.4731	2.91406e-05	0.00349571
EPHA7	70.855	1.84047	0.869583	4.25504	0.0391341	0.368777
TMEM158	339.726	1.90423	0.503491	13.4377	0.000246619	0.0172002
LCP1	274.685	2.17021	0.505948	17.0935	3.55841e-05	0.00391621
SHISA2	119.611	2.24642	0.599152	13.124	0.000291536	0.0193271
PALD1	63.3235	2.3639	0.735476	9.65101	0.00189247	0.0669567
F2RL3	261.744	2.68335	0.39718	41.6821	1.07387e-10	9.86096e-08
CYP1A1	114.293	2.73457	0.475173	30.7805	2.88932e-08	1.18905e-05
CD24	110.273	3.04815	0.470835	39.1073	4.01145e-10	3.20809e-07
DRAXIN	39.3598	3.72993	0.678562	30.7247	2.97361e-08	1.18905e-05
PLVAP	133.884	3.73071	0.618559	31.2626	2.25383e-08	9.65604e-06

## Sheet: Bulk - Snc-KD in NM
gene_name	baseMean	log2FoldChange	lfcSE	stat	pvalue	padj
C2orf92	7.0758	-4.0119	1.61984	6.23484	0.0125261	0.999812
PAPPA2	71.7031	-3.91782	0.807825	20.1587	7.12741e-06	0.0184754
MSC-AS1	6.30334	-3.84569	1.73038	4.87514	0.0272462	0.999812
MYO15B	53.0332	-3.25016	0.800082	14.7521	0.000122608	0.136208
LRMDA	6.28694	-3.21174	1.56095	4.13377	0.0420356	0.999812
LOC107984581	11.5328	-3.03141	1.21569	5.91558	0.0150076	0.999812
PLA2G4C	244.342	-3.00885	0.445898	40.4329	2.03481e-10	1.05492e-06
LOC107986406	7.36079	-3.00646	1.47553	3.99237	0.0457067	0.999812
PARP8	14.0152	-2.84559	1.25021	4.80802	0.0283276	0.999812
LINC02101	9.43746	-2.77042	1.28759	4.45051	0.0348908	0.999812
LPIN3	9.31998	-2.70637	1.24767	4.53761	0.0331578	0.999812
ANK2	9.88877	-2.56583	1.27179	3.89704	0.0483714	0.999812
KCNT2	11.6513	-2.55312	1.20372	4.27035	0.038783	0.999812
SLC45A1	12.3078	-2.47677	1.17176	4.24879	0.0392784	0.999812
IRF5	25.514	-2.43281	0.923667	6.51948	0.0106699	0.999812
ZBED3-AS1	12.6209	-2.34492	1.07992	4.53557	0.0331973	0.999812
MAP2	90.4713	-2.28944	0.644815	11.7205	0.000618146	0.36977
LOC112268064	11.9038	-2.28086	1.10565	4.10787	0.0426841	0.999812
FAM155A	70.0922	-2.26509	0.563357	15.2819	9.25988e-05	0.120016
LOC101928516	42.3046	-2.2446	0.691738	9.99053	0.00157347	0.596884
KCTD16	40.935	-2.2356	0.791152	7.50844	0.00614107	0.999812
MX2	42.4671	-2.14236	0.900304	5.30949	0.0212096	0.999812
GNG2	22.3056	-2.08753	0.980162	4.31835	0.0377034	0.999812
CXCL10	71.0528	-2.06393	0.615359	10.6493	0.00110114	0.475724
BMPR1B	81.0573	-2.00714	0.630418	9.58768	0.00195888	0.677031
NEK11	82.7502	-2.00005	0.622748	9.76156	0.00178199	0.637058
NPTX1	282.68	-1.98977	0.446189	18.6683	1.55548e-05	0.0333117
LOC107986195	27.3449	-1.98622	0.806352	5.83735	0.0156895	0.999812
MSC	29.8925	-1.90911	0.846537	4.86967	0.0273327	0.999812
LOC107986513	28.3121	-1.88824	0.766478	5.85604	0.0155237	0.999812
TTC29	88.2504	-1.86478	0.530517	11.8138	0.000587948	0.368582
C15orf48	33.434	-1.82671	0.744196	5.80807	0.0159528	0.999812
CHSY3	58.1023	-1.82635	0.596623	9.01107	0.0026835	0.766595
AFF3	241.76	-1.82391	0.656772	7.27981	0.00697341	0.999812
PSMB9	49.5199	-1.82259	0.625378	8.18238	0.00422993	0.939829
IL1RAPL1	83.9853	-1.82051	0.688641	6.64703	0.00993211	0.999812
EPSTI1	211.308	-1.79204	0.439623	15.8181	6.97328e-05	0.0985958
FMNL1	24.0222	-1.78912	0.819615	4.61562	0.031682	0.999812
APH1B	300.021	-1.74374	0.425349	15.999	6.33771e-05	0.0985704
IGFBP7	3318.93	-1.71975	0.511217	10.7091	0.00106611	0.475724
TRAF3IP2-AS1	61.3172	-1.67983	0.570129	8.39537	0.00376179	0.886471
RASA4	37.1601	-1.67351	0.689754	5.70977	0.0168708	0.999812
PRICKLE2	101.954	-1.65952	0.529233	9.45723	0.00210318	0.695975
MMP25	26.9737	-1.62418	0.757671	4.47372	0.0344201	0.999812
PLCB4	94.6315	-1.61504	0.527978	9.03353	0.00265073	0.766595
APLF	69.9233	-1.6005	0.548239	8.25255	0.00406949	0.917286
STXBP5-AS1	69.8252	-1.59369	0.586675	7.12693	0.00759347	0.999812
EVC	999.799	-1.55783	0.508903	8.95957	0.0027602	0.766595
CTSK	242.31	-1.55252	0.673726	5.08709	0.0241045	0.999812
CSF2	123.106	-1.53344	0.482605	9.7645	0.00177914	0.637058
RELN	540.207	-1.53301	0.437114	11.7995	0.000592462	0.368582
PHF21A	457.286	-1.52969	0.401134	13.9681	0.000185942	0.192798
LOC105369958	438.854	-1.52526	0.418557	12.7548	0.000355089	0.270832
LRRIQ1	41.7533	-1.42696	0.706655	3.97528	0.0461727	0.999812
ABCA9	44.73	-1.42663	0.647316	4.74311	0.0294159	0.999812
LOC644135	56.2872	-1.42098	0.632195	4.91481	0.0266273	0.999812
TLE4	401.257	-1.40052	0.404804	11.5747	0.00066854	0.37135
PCDHGB7	107.029	-1.39797	0.503244	7.50656	0.00614748	0.999812
HS6ST2	54.0207	-1.39787	0.606135	5.19201	0.0226909	0.999812
DNER	108.642	-1.38441	0.605721	5.0708	0.0243322	0.999812
RABEPK	387.682	-1.37115	0.415068	10.5644	0.00115286	0.484605
ACYP2	49.447	-1.36584	0.668659	4.07048	0.0436389	0.999812
MAGI2	40.3221	-1.35733	0.675748	3.94918	0.0468942	0.999812
OBSL1	89.2809	-1.34422	0.513418	6.68534	0.00972088	0.999812
FBXL13	259.606	-1.34116	0.423394	9.74076	0.00180226	0.637058
ABHD8	79.63	-1.33962	0.648858	4.14746	0.0416971	0.999812
TMEM161B-AS1	47.0163	-1.33283	0.669048	3.87999	0.0488648	0.999812
UBE2L6	491.26	-1.33279	0.396498	10.9503	0.000935906	0.45488
ADCY4	242.676	-1.33235	0.426457	9.4807	0.00207644	0.695975
C1RL	99.9624	-1.33173	0.507965	6.69868	0.00964841	0.999812
COLEC12	224.104	-1.32862	0.438695	8.91324	0.00283111	0.772496
TBCK	248.182	-1.30233	0.425992	9.08921	0.00257122	0.766595
ACSF2	62.694	-1.28053	0.624139	4.11407	0.042528	0.999812
CXCL11	57.8098	-1.2692	0.631729	3.95132	0.0468346	0.999812
MCTP1	529.484	-1.2585	0.427538	8.42251	0.00370603	0.886471
DNAH5	106.758	-1.25681	0.556572	4.97691	0.0256879	0.999812
THSD4	1133.39	-1.2467	0.385863	10.142	0.00144931	0.563528
ICAM1	5498.81	-1.237	0.361578	11.3653	0.000748286	0.388102
QRICH2	73.7694	-1.23109	0.56884	4.586	0.0322341	0.999812
C7orf31	52.0935	-1.22844	0.60482	4.04764	0.044233	0.999812
XAF1	706.83	-1.20532	0.4082	8.48921	0.00357258	0.868193
IMMP2L	66.0664	-1.20004	0.553921	4.60529	0.0318735	0.999812
ZNF704	200.958	-1.1931	0.471939	6.24521	0.012453	0.999812
GKAP1	86.7075	-1.19196	0.535105	4.86217	0.0274517	0.999812
LOC112268063	114.317	-1.19128	0.515924	5.22096	0.0223163	0.999812
HDAC9	442.371	-1.19042	0.467878	6.31012	0.0120051	0.999812
PCK2	714.385	-1.1894	0.487891	5.78658	0.0161489	0.999812
ALPK1	75.8321	-1.18353	0.5438	4.64744	0.0310999	0.999812
DDX58	1911.14	-1.17125	0.385607	8.98916	0.00271586	0.766595
ADGRA3	1192.98	-1.16498	0.382686	9.03553	0.00264782	0.766595
IFI35	280.444	-1.14973	0.428798	7.0275	0.00802675	0.999812
TNKS	1099.29	-1.14863	0.492068	5.31444	0.0211494	0.999812
IFIT1	558.45	-1.1386	0.481343	5.46236	0.0194304	0.999812
FBXL7	879.623	-1.13477	0.395226	8.0499	0.00455062	0.982998
PLA2R1	1782.08	-1.13128	0.379203	8.68686	0.00320512	0.817201
ZBTB20	350.405	-1.12985	0.498041	5.029	0.0249263	0.999812
FAR2	1340.2	-1.12982	0.377078	8.76488	0.00307087	0.79602
RYK	973.212	-1.12443	0.375074	8.77943	0.00304646	0.79602
IFI44L	1103.43	-1.11862	0.55757	3.92992	0.0474343	0.999812
RGS20	110.162	-1.11577	0.498918	4.90997	0.026702	0.999812
HS6ST3	79.7556	-1.11567	0.551077	4.03013	0.0446944	0.999812
BCAS3	118.294	-1.11347	0.492933	5.00687	0.0252469	0.999812
CLIP3	186.206	-1.10629	0.478705	5.23305	0.0221616	0.999812
UBA7	191.707	-1.08991	0.434526	6.17397	0.0129643	0.999812
SHC2	87.3965	-1.08571	0.540367	3.96528	0.0464478	0.999812
LOC105379362	174.071	-1.07868	0.495781	4.64253	0.0311889	0.999812
CRACD	758.671	-1.07045	0.417879	6.42462	0.0112549	0.999812
POU2F2	787.114	-1.06916	0.452384	5.46681	0.019381	0.999812
FENDRR	184.173	-1.06004	0.438432	5.74306	0.0165539	0.999812
ZMAT1	81.4268	-1.06	0.52477	4.01604	0.0450693	0.999812
NUTM2A-AS1	423.142	-1.05904	0.416233	6.34622	0.0117632	0.999812
CCDC159	124.227	-1.05141	0.520067	4.01474	0.0451042	0.999812
FBXL17	316.654	-1.04779	0.415217	6.24937	0.0124238	0.999812
CCDC136	105.198	-1.04562	0.48873	4.50643	0.0337676	0.999812
PHGDH	709.447	-1.03565	0.507127	4.08606	0.0432382	0.999812
ABCA6	100.954	-1.03537	0.502178	4.1872	0.0407304	0.999812
ICA1L	131.627	-1.03141	0.470223	4.73591	0.0295393	0.999812
ME3	618.05	-1.03117	0.406756	6.30251	0.0120567	0.999812
EFCAB2	120.147	-1.02643	0.475131	4.59373	0.0320891	0.999812
BIRC3	1536.24	-1.01791	0.497586	4.10254	0.0428189	0.999812
OAS2	972.204	-1.0151	0.502321	4.00445	0.0453804	0.999812
IFI6	1248.89	-1.01273	0.388241	6.67318	0.00978745	0.999812
NUTM2B-AS1	194.622	-0.995548	0.434229	5.17387	0.022929	0.999812
CTHRC1	190.274	-0.991695	0.480605	4.18716	0.0407314	0.999812
TRPM4	151.26	-0.971451	0.469371	4.21933	0.039966	0.999812
CSF3	641.51	-0.970849	0.39703	5.87614	0.0153474	0.999812
IFITM1	511.703	-0.968111	0.404243	5.63807	0.0175746	0.999812
ITPK1	703.77	-0.965421	0.384707	6.19039	0.0128446	0.999812
ECHDC2	212.24	-0.964057	0.441679	4.69046	0.0303305	0.999812
IFIT3	398.825	-0.96397	0.441382	4.6905	0.0303298	0.999812
CWC27	974.617	-0.962808	0.417542	5.22493	0.0222654	0.999812
TSPAN18	221.487	-0.956086	0.459952	4.25363	0.0391665	0.999812
EVI5L	234.008	-0.946371	0.47588	3.89399	0.0484592	0.999812
ST6GALNAC3	768.505	-0.9398	0.411326	5.1348	0.0234508	0.999812
BBS9	226.056	-0.918361	0.453338	4.04525	0.0442958	0.999812
NCSTN	1466.47	-0.914987	0.380663	5.68604	0.0171004	0.999812
TUSC3	581.563	-0.9095	0.393965	5.24966	0.0219511	0.999812
RASSF3	2987.71	-0.9062	0.370044	5.9027	0.0151177	0.999812
B9D1	203.147	-0.902465	0.451094	3.9474	0.0469439	0.999812
CXCL8	10676.6	-0.901537	0.41753	4.58858	0.0321858	0.999812
TCTN1	179.32	-0.886369	0.446334	3.89393	0.0484609	0.999812
CCDC91	336.812	-0.870685	0.4329	3.99107	0.0457419	0.999812
CXCL2	957.578	-0.86812	0.428002	4.0556	0.044025	0.999812
IFI27	2753.04	-0.863052	0.417898	4.20374	0.040335	0.999812
FOPNL	615.45	-0.860962	0.383426	4.97423	0.0257277	0.999812
PLCB1	359.004	-0.859814	0.422986	4.07933	0.0434108	0.999812
RBM25	4453.74	-0.852869	0.384269	4.85652	0.0275419	0.999812
PDSS2	328.611	-0.846465	0.407999	4.25173	0.0392104	0.999812
GAA	264.976	-0.845723	0.414277	4.11692	0.0424564	0.999812
FAM193A	653.819	-0.843812	0.396403	4.47226	0.0344495	0.999812
OSBPL10	796.885	-0.833523	0.391158	4.48233	0.0342469	0.999812
CXCL1	6098.11	-0.832978	0.405678	4.15915	0.0414102	0.999812
NFIA	707.372	-0.830949	0.379002	4.74618	0.0293635	0.999812
APOL1	463.465	-0.822902	0.39505	4.28643	0.0384177	0.999812
ENOX2	298.553	-0.819177	0.412949	3.89015	0.04857	0.999812
MSI2	659.851	-0.818846	0.388588	4.38629	0.036229	0.999812
NTM	697.162	-0.818424	0.380446	4.57068	0.0325237	0.999812
RALGAPA2	785.049	-0.802158	0.402912	3.91664	0.0478103	0.999812
PAM	2049.82	-0.787505	0.370658	4.46025	0.0346924	0.999812
ANKRD18B	657.935	-0.776433	0.383175	4.06076	0.0438908	0.999812
C2orf27A	829.146	0.740158	0.375359	3.84908	0.0497731	0.999812
LIMA1	4179.63	0.76782	0.38165	4.00134	0.0454642	0.999812
TRAF4	1158.7	0.772474	0.384674	3.98684	0.0458571	0.999812
KCTD12	9004.31	0.779972	0.388619	3.98042	0.0460322	0.999812
CNN3	4129.03	0.780928	0.385171	4.06197	0.0438592	0.999812
PPM1D	827.36	0.798518	0.399583	3.94719	0.0469498	0.999812
SNHG1	1781.57	0.801211	0.368334	4.67384	0.0306253	0.999812
KCNJ2	655.585	0.812657	0.388916	4.31461	0.0377864	0.999812
GRPEL2	1641.04	0.832658	0.36613	5.10406	0.0238699	0.999812
DHCR24	2444.87	0.83461	0.412567	4.03792	0.0444886	0.999812
SLC24A1	443.389	0.847884	0.399725	4.44185	0.0350682	0.999812
RAB3B	6371.61	0.848361	0.398764	4.46301	0.0346364	0.999812
TLR4	2563.63	0.855554	0.38776	4.79993	0.028461	0.999812
GPRC5B	904.87	0.860121	0.43398	3.87302	0.0490683	0.999812
ODC1	6547.99	0.876176	0.413151	4.43051	0.035302	0.999812
LINC00472	493.302	0.879374	0.398537	4.80259	0.0284169	0.999812
MAFB	173.171	0.888507	0.448436	3.87716	0.0489472	0.999812
NATD1	235.623	0.893405	0.421695	4.43209	0.0352693	0.999812
LRRC8B	729.078	0.89438	0.452528	3.84936	0.0497651	0.999812
NDRG1	2483.28	0.896419	0.362388	6.02501	0.0141046	0.999812
TOX2	421.716	0.920418	0.414181	4.8637	0.0274275	0.999812
FAM210A	1411.02	0.971113	0.396939	5.87946	0.0153185	0.999812
RNA45SN1	1406.56	0.979047	0.415077	5.4627	0.0194267	0.999812
TRIB2	338.415	0.98582	0.407195	5.76535	0.0163452	0.999812
PAQR3	1876.88	0.99349	0.460975	4.55805	0.0327644	0.999812
USHBP1	130.658	0.995308	0.474191	4.34126	0.0371993	0.999812
CDKN2B	264.992	1.02182	0.439181	5.32064	0.0210742	0.999812
PKP2	302.218	1.0251	0.420409	5.84461	0.0156249	0.999812
FAM124B	1132.04	1.02858	0.414622	6.03345	0.0140373	0.999812
EFNB2	665.775	1.0317	0.420135	5.91597	0.0150043	0.999812
SAMSN1	395.314	1.05893	0.528382	3.93454	0.0473041	0.999812
SLC40A1	291.302	1.12598	0.519328	4.59813	0.0320069	0.999812
KLF5	240.81	1.13456	0.463135	5.8785	0.0153269	0.999812
ARRDC3	840.314	1.15697	0.381576	8.97323	0.00273964	0.766595
ZNF850	111.9	1.17054	0.572714	4.09646	0.0429732	0.999812
RNA45SN3	1163.04	1.17168	0.427926	7.3049	0.00687669	0.999812
P2RY1	79.3183	1.20572	0.575646	4.31253	0.0378326	0.999812
C15orf62	82.0345	1.20798	0.563716	4.49582	0.0339779	0.999812
GADL1	61.8086	1.22586	0.610713	3.95159	0.046827	0.999812
PCDH17	143.044	1.2292	0.504373	5.81248	0.0159129	0.999812
TM4SF18	1467.68	1.23628	0.439714	7.67908	0.00558646	0.999812
LCP1	283.41	1.25136	0.420988	8.61692	0.00333055	0.835485
RNA45SN2	1617.73	1.25845	0.475052	6.81055	0.0090621	0.999812
LFNG	93.4641	1.26482	0.527706	5.63382	0.0176172	0.999812
BCL2L11	405.356	1.29325	0.400104	10.1581	0.00143668	0.563528
ACER2	152.443	1.34743	0.462671	8.27035	0.00402978	0.917286
MDK	1599.67	1.34997	0.381689	12.0908	0.0005067	0.342639
PLVAP	332.597	1.39841	0.524157	6.87865	0.00872316	0.999812
INKA2	505.293	1.42796	0.393744	12.6999	0.000365683	0.270832
BMF	48.7054	1.48495	0.630987	5.41823	0.0199276	0.999812
DDIT4L	998.98	1.48866	0.419011	12.1207	0.000498662	0.342639
CPM	39.1705	1.5709	0.71089	4.76482	0.0290472	0.999812
SLCO5A1	4699.2	1.58835	0.701019	4.89465	0.02694	0.999812
EPHA7	64.5447	1.61745	0.784275	4.09428	0.0430285	0.999812
AIF1L	65.5667	1.62333	0.612407	6.81016	0.00906409	0.999812
EXOC3L2	30.4912	1.62416	0.747663	4.61833	0.031632	0.999812
AOX1	27.9364	1.6824	0.771748	4.6443	0.0311569	0.999812
CKB	44.8757	1.69226	0.655492	6.47829	0.01092	0.999812
COLEC10	78.933	1.72479	0.658924	6.57052	0.0103682	0.999812
TGFA	20.6799	1.74387	0.863766	3.99816	0.0455499	0.999812
TMEM273	47.5236	1.74963	0.635412	7.38353	0.00658238	0.999812
PRDM1	71.8745	1.75496	0.636176	7.3112	0.00685263	0.999812
SHISA2	137.307	1.76037	0.526862	10.6815	0.00108215	0.475724
ZNF114	188.481	1.8255	0.778135	5.19131	0.0227001	0.999812
CEACAM1	56.572	1.88086	0.702038	6.87599	0.00873613	0.999812
RCSD1	30.7961	1.94219	0.754684	6.43007	0.0112204	0.999812
PINCR	62.1145	1.97609	0.590641	10.7801	0.00102598	0.475724
IGFBP3	53.4131	2.08449	0.6169	11.0007	0.000910794	0.45488
VWCE	76.6791	2.10187	0.557625	13.6092	0.000225083	0.195778
PI16	30.0708	2.13434	0.875266	5.70658	0.0169014	0.999812
F2RL3	263.537	2.1939	0.57205	13.6025	0.000225883	0.195778
LRRC4	90.6842	2.30306	0.581036	14.8439	0.000116785	0.136208
CYP1A1	304.181	2.3729	0.44856	25.7701	3.846e-07	0.00119634
PI3	70.3817	2.45184	0.701357	11.3645	0.000748606	0.388102
LOC101928100	38.9612	2.4614	0.804472	8.86439	0.00290788	0.779764
SPINK1	11.7198	2.50104	1.16736	4.52287	0.0334446	0.999812
RN7SL3	33.5339	2.58079	1.11113	4.99026	0.0254904	0.999812
TENT5B	10.5995	2.62559	1.23478	4.46252	0.0346464	0.999812
RASEF	11.5597	2.76574	1.21627	5.09229	0.0240325	0.999812
LOC105370364	7.92628	2.94157	1.44594	4.12185	0.0423327	0.999812
SLC9B1	11.0428	3.04292	1.28795	5.52225	0.0187761	0.999812
LOC105369401	22.1365	3.18748	1.18593	6.65674	0.00987813	0.999812
CD300LB	16.2868	3.28964	1.09079	9.06957	0.00259898	0.766595
ITM2A	13.2228	3.37427	1.32432	6.33134	0.0118622	0.999812
H1-5	10.3312	3.41703	1.4764	5.26009	0.0218199	0.999812
SLAMF7	8.95595	3.74374	1.56314	5.85419	0.01554	0.999812
NTS	14.8839	3.88061	1.5663	5.63331	0.0176223	0.999812
RN7SK	223.718	3.90682	0.822128	18.4839	1.71346e-05	0.0333117
DRAXIN	135.129	3.98427	0.535116	51.029	9.10105e-13	7.07743e-09
CD24	337.791	4.04205	0.451922	68.2284	1.4561e-16	2.26467e-12
SNORD3A	214.309	4.24297	1.76044	4.49665	0.0339614	0.999812
HTN1	12.7552	4.29166	1.52121	8.14002	0.00432988	0.948488
RNU1-1	19.4746	4.44502	1.49425	8.31226	0.00393783	0.914106
SNORD3B-1	66.8339	4.52143	1.0212	16.6771	4.43125e-05	0.0765769
LPL	7.24559	4.56475	1.95087	6.12922	0.0132966	0.999812
SNORA53	41.5873	4.75681	0.900734	30.7709	2.9036e-08	0.000112899
SNORD3C	12.6789	5.34443	1.91349	8.51052	0.003531	0.868193
SNORD3D	12.7309	5.39323	1.82722	10.4398	0.00123331	0.50478
LOC101929048	13.3098	5.46005	1.71964	13.5967	0.00022658	0.195778
RNU1-4	268.706	5.53373	2.10902	4.73994	0.0294701	0.999812
RNA5S9	6.95848	5.98002	2.28603	6.23153	0.0125495	0.999812
RNU5B-1	9.76337	6.46866	2.06354	9.1685	0.00246217	0.766595
RNU5E-1	11.8939	6.7535	1.94735	11.649	0.000642372	0.37003
RNU5A-1	14.2859	7.01811	1.91528	13.1183	0.000292424	0.239372
APOL4	29.6683	8.07521	3.34862	4.02749	0.0447644	0.999812

## Sheet: Bulk - Snc-OE
gene_name	baseMean	log2FoldChange	lfcSE	stat	pvalue	padj
MSC	56.0063	9.21597	1.27776	7.21261	5.48888e-13	1.23375e-10
DCDC2C	33.2625	8.45618	1.2616	6.70274	2.04542e-11	3.49412e-09
KLHDC7B	29.8521	8.30775	1.37949	6.02236	1.71895e-09	2.00211e-07
MSC-AS1	29.3297	8.28715	1.26253	6.5639	5.2418e-11	8.04286e-09
IL36B	26.4459	8.13651	1.39089	5.84986	4.91992e-09	5.10396e-07
C3	523.312	8.04837	0.561873	14.3242	1.54517e-46	1.97968e-42
SPINK1	26.7109	7.16917	1.26484	5.66806	1.44422e-08	1.31696e-06
EHF	9.46	6.65952	1.37898	4.82931	1.37009e-06	7.2386e-05
DCLK3	8.41244	6.48367	1.47685	4.3902	1.13248e-05	0.000448512
MAF	400.062	6.36874	1.03813	6.13484	8.52474e-10	1.07605e-07
MX2	104.317	6.30697	1.36383	4.62446	3.75567e-06	0.000174656
TNFRSF9	233.108	6.25754	1.10925	5.64124	1.68831e-08	1.51938e-06
RP11-284G10.1	6.86477	6.19414	1.48931	4.15907	3.19546e-05	0.00106477
LINC02574	12.9014	6.11947	1.35695	4.50972	6.49136e-06	0.000277687
IFI44L	1841.75	6.10589	0.554315	11.0152	3.2276e-28	4.35284e-25
CCL20	120.487	6.01701	0.622634	9.6638	4.29642e-22	3.14547e-19
MX1	4303.63	5.99697	0.480436	12.4824	9.31695e-36	2.38737e-32
FAM163A	5.663	5.90756	1.47932	3.99344	6.51229e-05	0.00193361
CLDN1	1748.93	5.85151	0.524213	11.1625	6.22396e-29	8.86015e-26
CSF2	176.926	5.82481	0.435521	13.3744	8.5381e-41	3.64634e-37
CD69	38.3147	5.48207	0.875807	6.25945	3.86329e-10	5.15588e-08
IFIT1	726.353	5.33873	0.451682	11.8197	3.08961e-32	5.65487e-29
AC007405.6	7.55499	5.32408	1.39291	3.82228	0.000132225	0.00344673
IL13RA2	73.8322	5.31565	0.556572	9.55071	1.28808e-21	8.25147e-19
CXCL10	7.48259	5.31033	1.74287	3.04688	0.00231231	0.0351427
CXCL8	14529.4	5.3059	0.359301	14.7673	2.38022e-49	6.09907e-45
CXCL5	236.08	5.30459	0.459001	11.5568	6.81848e-31	1.09198e-27
SLC22A15	7.34073	5.28618	1.39538	3.78834	0.000151659	0.00385526
KCNK3	31.4463	5.09102	1.06444	4.78283	1.72843e-06	8.94735e-05
NEURL3	11.2756	5.05339	1.22278	4.13269	3.58543e-05	0.00116442
KYNU	297.896	5.02604	0.462992	10.8556	1.87633e-27	2.18541e-24
IFI6	7560.84	5.01508	0.371264	13.5081	1.40047e-41	7.17711e-38
TNIP3	64.3748	4.94041	0.590735	8.36316	6.10604e-17	2.37063e-14
RP11-570H19.2	26.6886	4.92029	0.922119	5.33586	9.5095e-08	7.08347e-06
RP13-314C10.5	5.65545	4.91811	1.44776	3.39704	0.000681198	0.0132235
LINC02605	11.4197	4.87273	1.49794	3.25296	0.0011421	0.0200998
TXNIP	1206.63	4.87034	1.33224	3.65576	0.000256418	0.00603901
RP1	15.5696	4.86788	1.04446	4.66067	3.15188e-06	0.000150398
SLC22A25	10.6433	4.8361	1.25343	3.85828	0.000114186	0.00305098
LINC00623	17.2873	4.6945	0.956656	4.90719	9.2389e-07	5.12186e-05
EPSTI1	312.677	4.61701	0.484896	9.52166	1.70427e-21	1.06513e-18
OLAH	37.6722	4.42778	0.602238	7.35221	1.94951e-13	4.99544e-11
HORMAD1	6.59253	4.26445	1.28016	3.33119	0.000864747	0.0160335
PCBP3	7.3158	4.24456	1.28219	3.31039	0.000931656	0.0169671
RP11-95M15.3	121.894	4.21226	0.498046	8.45759	2.7297e-17	1.14665e-14
RP11-115D10.1	13.364	4.20883	1.07689	3.90831	9.29427e-05	0.00256568
TNC	100.919	4.20775	0.431404	9.7536	1.78042e-22	1.42567e-19
HMX3	13.5053	4.195	1.07665	3.89637	9.76469e-05	0.00266749
BEX2	143.84	4.19362	0.387178	10.8312	2.44794e-27	2.72721e-24
RP11-95M15.2	76.6184	4.19309	0.446406	9.393	5.83132e-21	3.32048e-18
MGAT4C	9.36744	4.18954	1.27775	3.27885	0.0010423	0.0186508
LINC00488	6.32245	4.17127	1.31195	3.17945	0.00147555	0.0244247
C1S	67.4108	4.13662	0.701915	5.89334	3.78463e-09	4.02396e-07
SPX	273.271	4.1339	0.402707	10.2653	1.01047e-24	9.24723e-22
RP11-293M10.6	8.89482	4.0785	1.23897	3.29186	0.000995287	0.0178845
C15orf48	57.6649	4.05329	0.503427	8.0514	8.18548e-16	2.7966e-13
LINC02591	26.8532	4.04519	0.671691	6.02239	1.71861e-09	2.00211e-07
KLHL30-AS1	95.1299	3.95886	1.17924	3.35711	0.000787604	0.0148722
LIF	113.314	3.92187	0.560602	6.99582	2.63709e-12	5.23821e-10
BIRC3	1077.32	3.91131	0.573959	6.81461	9.45189e-12	1.72997e-09
CXCL2	1119.03	3.90769	0.542216	7.2069	5.72403e-13	1.27541e-10
IL1B	88.9936	3.90416	0.577776	6.75722	1.40661e-11	2.4774e-09
RP11-463O9.9	11.0541	3.88564	1.15769	3.35636	0.000789744	0.0148797
PRAL	7.75777	3.88174	1.13129	3.43125	0.000600813	0.0120162
LINC02101	15.1011	3.87671	0.925311	4.18963	2.79412e-05	0.000957174
RP11-288L9.4	26.5343	3.815	0.713285	5.3485	8.86884e-08	6.68397e-06
RAB39B	58.5939	3.80339	0.592249	6.42194	1.34548e-10	1.90799e-08
HGFAC	49.8521	3.80266	0.675833	5.62663	1.8376e-08	1.64065e-06
IFI27	15090.7	3.74991	0.284583	13.1768	1.19283e-39	4.36643e-36
ARRDC4	35.3521	3.71293	0.817307	4.54288	5.54901e-06	0.000242275
IFI27	13170.4	3.69771	0.304966	12.125	7.78594e-34	1.8137e-30
ICAM1	19904	3.68688	0.381236	9.67088	4.00933e-22	3.02162e-19
OAS2	1189.66	3.65695	0.455635	8.02605	1.0066e-15	3.39383e-13
FOLR3	39.4804	3.63697	0.861053	4.22386	2.40156e-05	0.000839531
CTD-2369P2.8	14.9619	3.60421	1.02127	3.52916	0.000416888	0.00891681
KCTD16	485.066	3.60242	0.621161	5.7995	6.65137e-09	6.63171e-07
TSLP	39.4074	3.59576	0.581841	6.17997	6.41124e-10	8.29706e-08
CXCL1	4191.48	3.58973	0.329922	10.8805	1.42708e-27	1.74131e-24
LINC00304	32.855	3.58504	0.622738	5.75691	8.56691e-09	8.30908e-07
GBP5	21.0266	3.57143	0.737041	4.84563	1.26208e-06	6.7374e-05
LPAR5	61.1708	3.56788	0.798532	4.46805	7.89368e-06	0.000329426
ANKFN1	35.097	3.56274	0.897231	3.97082	7.1625e-05	0.00208559
FAM71F1	8.37725	3.54036	1.19214	2.96976	0.00298032	0.0423278
TGFA	47.2977	3.51233	0.723515	4.85454	1.20666e-06	6.46853e-05
HLA-B	2202.9	3.50441	0.389765	8.99107	2.44827e-19	1.23009e-16
CXCL3	412.285	3.49591	0.362833	9.63505	5.68667e-22	3.93825e-19
AC005532.5	8.46381	3.4914	1.12497	3.10355	0.00191217	0.030208
ANK2	397.163	3.47779	0.333432	10.4303	1.80329e-25	1.77721e-22
RPLP0P2	254.685	3.41432	0.288505	11.8345	2.5876e-32	5.10036e-29
LCN1	7.69447	3.40087	1.13298	3.0017	0.00268474	0.0394234
PGAM1P1	11.0456	3.39546	0.867671	3.9133	9.10434e-05	0.00252751
IFITM10	11.5109	3.38926	0.879914	3.85181	0.000117248	0.00311332
VIM2P	161.454	3.3885	0.642331	5.27532	1.32525e-07	9.49406e-06
RELN	4369.99	3.37043	0.240644	14.0059	1.43447e-44	1.22523e-40
HLA-B	3294.72	3.37041	0.34159	9.86682	5.79744e-23	4.79205e-20
C5AR1	23.2328	3.3623	0.922306	3.64554	0.000266831	0.0062157
IL6	537.154	3.34556	0.331109	10.1041	5.29881e-24	4.52589e-21
HLA-B	1671.56	3.34476	0.579626	5.77055	7.9013e-09	7.7572e-07
H2BU1	12.7413	3.32406	0.801137	4.14918	3.33674e-05	0.00110323
SELE	309.666	3.32307	0.550788	6.03331	1.60638e-09	1.88816e-07
CITF22-49D8.1	26.7839	3.31884	0.709478	4.67786	2.89888e-06	0.000140951
CXCL6	166.781	3.30253	0.434589	7.59921	2.97946e-14	8.67564e-12
U82671.16	25.9093	3.29947	1.05174	3.13715	0.001706	0.0275034
RLN2	7.09474	3.28301	1.07304	3.05953	0.00221682	0.033994
ULBP1	1537.49	3.27749	0.48931	6.69819	2.11018e-11	3.55732e-09
RP11-439A17.10	11.9422	3.265	0.825155	3.95683	7.595e-05	0.00219407
LCP1	164.315	3.25571	0.337368	9.65034	4.89937e-22	3.48726e-19
HLA-B	1344.29	3.24064	0.340976	9.50402	2.01943e-21	1.21327e-18
HLA-B	1155.69	3.2345	0.419147	7.71687	1.19221e-14	3.68064e-12
AC012513.6	12.7929	3.23292	0.890971	3.62853	0.000285034	0.00654455
XAF1	476.339	3.20995	0.443966	7.23017	4.82395e-13	1.12372e-10
CTD-3018O17.7	11.0655	3.18825	1.08591	2.93601	0.00332469	0.0460745
KRTAP5-AS1	24.5701	3.1815	0.644431	4.93691	7.93698e-07	4.47967e-05
KRTAP5-AS1	24.5701	3.1815	0.644431	4.93691	7.93698e-07	4.47967e-05
IFITM10	26.9748	3.15671	0.577952	5.46189	4.71096e-08	3.82005e-06
LINC01629	66.2843	3.12848	0.780191	4.00989	6.07462e-05	0.00182267
H2BU1	12.6403	3.1135	0.778271	4.00053	6.32011e-05	0.00188749
KRTAP5-AS1	23.4774	3.109	0.655807	4.74072	2.12958e-06	0.000108486
RSPO3	37.5252	3.08791	0.81293	3.79849	0.000145578	0.00371173
RP11-378J18.10	8.36476	3.07907	0.971847	3.16826	0.00153354	0.0251894
OASL	37.9102	3.06847	0.840472	3.65088	0.00026134	0.00611559
LINC01081	12.0307	3.06042	0.811816	3.76985	0.000163347	0.00410757
SLC7A2	6560.16	3.05458	0.895241	3.41202	0.000644825	0.0126613
RRAD	20.8668	3.0496	0.818676	3.72504	0.000195282	0.0047976
C6orf132	45.2095	3.04774	0.599902	5.0804	3.76638e-07	2.37125e-05
IL20RB	219.259	3.04669	0.289153	10.5366	5.85775e-26	6.25412e-23
SLC6A13	10.5657	3.04476	1.03154	2.95165	0.00316077	0.0442708
HLA-B	3801.71	3.04282	0.334698	9.09123	9.79232e-20	5.12078e-17
LAMA1	34.9115	3.04201	0.490884	6.197	5.75479e-10	7.48532e-08
S100P	18.364	3.04127	0.844531	3.60114	0.000316823	0.00711242
LINC01145	54.5819	3.02918	0.438766	6.90387	5.0606e-12	9.67707e-10
RP11-254F7.2	80.4564	3.02644	0.361364	8.37506	5.51937e-17	2.17582e-14
EBI3	49.0358	3.01002	0.647016	4.65215	3.28487e-06	0.000156162
RP11-7F17.1	44.6924	3.00617	0.828475	3.62856	0.000285008	0.00654455
NDUFA3	513.324	2.98337	0.548162	5.4425	5.25379e-08	4.18084e-06
CSF3	1542.06	2.96506	0.348911	8.49802	1.92844e-17	8.491e-15
RP11-554D15.2	9.7651	2.94346	0.962255	3.05892	0.00222135	0.0340431
IFITM1	530.591	2.93168	0.443057	6.61693	3.66725e-11	5.91004e-09
AC003092.1	219.674	2.92759	0.346077	8.45936	2.68855e-17	1.14665e-14
AC006538.1	23.2505	2.91291	0.598446	4.86746	1.13044e-06	6.08538e-05
IRS1	187.061	2.90986	0.474968	6.12645	8.98633e-10	1.11779e-07
BDNF	436.903	2.90913	0.505483	5.75514	8.65705e-09	8.33941e-07
IRF7	1389.54	2.90516	0.24354	11.9289	8.36981e-33	1.78723e-29
SUGCT-AS1	44.0662	2.90392	0.526691	5.51351	3.51744e-08	2.93586e-06
RPSAP44	33.7903	2.90096	0.51771	5.60345	2.1013e-08	1.83142e-06
OAS1	1123.22	2.89691	0.388968	7.44768	9.49943e-14	2.61735e-11
ERFE	354.027	2.88937	0.580527	4.97716	6.45249e-07	3.74918e-05
RP11-442G21.2	15.9117	2.88735	0.753663	3.83109	0.000127577	0.00335974
TNFAIP3	1651	2.87696	0.317173	9.07065	1.18311e-19	6.06322e-17
EXPH5	16.7441	2.86557	0.724764	3.9538	7.69191e-05	0.00220714
ISG15	4254.96	2.85222	0.310308	9.19155	3.87211e-20	2.11104e-17
CH17-172B3.1	17.8564	2.84141	0.727019	3.9083	9.2948e-05	0.00256568
VNN1	14.1854	2.83796	0.825959	3.43596	0.000590467	0.0118668
RGS7	29.0579	2.83247	0.616825	4.59202	4.38973e-06	0.000196992
CCL2	4511.96	2.82189	0.271262	10.4028	2.40654e-25	2.2839e-22
SEZ6L2	246.426	2.81663	0.36518	7.713	1.22891e-14	3.74875e-12
CFB	150.715	2.809	0.459702	6.11048	9.93349e-10	1.21787e-07
CTC-483I11.5	9.35575	2.79829	0.881213	3.1755	0.00149579	0.0246642
KLF11	636.466	2.79554	0.423786	6.59658	4.20738e-11	6.65493e-09
LUZP2	16.2313	2.79349	0.775404	3.60263	0.000315016	0.00709936
CFB	145.355	2.78357	0.461064	6.03728	1.56733e-09	1.85074e-07
ACP7	91.6244	2.77861	0.412264	6.73987	1.58528e-11	2.74468e-09
ZDHHC11	185.314	2.76403	0.638341	4.33001	1.491e-05	0.000560197
LAMP3	878.119	2.75259	0.337004	8.16781	3.14047e-16	1.14959e-13
CH17-118O6.6	23.6917	2.74144	0.615804	4.4518	8.51525e-06	0.000351927
IRF7	1162.93	2.73769	0.281846	9.71343	2.64301e-22	2.05226e-19
TGFB2	512.374	2.73218	0.603512	4.52713	5.97901e-06	0.000258358
RP11-111J6.4	30.318	2.72579	0.903818	3.01586	0.00256253	0.0381093
CFB	137.796	2.71654	0.398618	6.8149	9.43311e-12	1.72997e-09
SNAPC1	2347.3	2.70175	0.390054	6.9266	4.31068e-12	8.30504e-10
ALOX5AP	28.7184	2.69945	0.538685	5.01119	5.40947e-07	3.18649e-05
LINC02846	21.1555	2.69387	0.597478	4.50873	6.52162e-06	0.000278517
HLA-F	22.7	2.68494	0.857221	3.13215	0.00173533	0.0278609
AOC3	23.9932	2.68413	0.578954	4.63618	3.54915e-06	0.000166563
OAS3	3925.7	2.67192	0.360853	7.40445	1.31692e-13	3.47883e-11
TMIE	69.5292	2.65693	0.589719	4.50542	6.62421e-06	0.000281958
CFB	132.708	2.65069	0.385595	6.87428	6.23036e-12	1.17387e-09
CFB	113.676	2.63588	0.481224	5.47744	4.31518e-08	3.54398e-06
ABCA1	2918.94	2.62601	0.358623	7.32249	2.43417e-13	6.05566e-11
KCNT2	174.524	2.59433	0.452518	5.7331	9.86137e-09	9.42864e-07
LINC00869	69.5818	2.59257	0.444558	5.83179	5.48373e-09	5.62472e-07
CTD-2037L6.3	12.8755	2.58743	0.826333	3.13122	0.00174085	0.0279145
PINCR	23.3258	2.58408	0.679822	3.80111	0.000144049	0.00368921
ENKUR	159.978	2.58358	0.633418	4.07879	4.52701e-05	0.00141303
ATF3	1439.16	2.54426	0.342462	7.42933	1.09151e-13	2.94409e-11
SYNGR3	220.055	2.5268	0.350184	7.21562	5.36888e-13	1.21745e-10
CFB	67.8444	2.51881	0.552668	4.55754	5.17555e-06	0.000229047
TRAF1	432.412	2.518	0.387869	6.49187	8.47774e-11	1.25569e-08
STC2	17697.3	2.49764	0.342018	7.30264	2.82182e-13	6.88633e-11
KIF1A	49.7427	2.48969	0.483067	5.15392	2.55094e-07	1.68467e-05
IFI44	1220.7	2.47385	0.489191	5.05701	4.25878e-07	2.62324e-05
RP1-149A16.3	12.0931	2.47226	0.834487	2.9626	0.00305049	0.0430903
KLK14	14.1653	2.46443	0.705365	3.49384	0.000476135	0.00987093
CEBPD	234.065	2.45783	0.597924	4.11061	3.94613e-05	0.00126539
PSD4	41.1644	2.45528	0.589127	4.16765	3.07755e-05	0.00103084
B3GALT5	10.6799	2.42233	0.831616	2.9128	0.00358202	0.0490308
LINC00324	23.1985	2.42107	0.57835	4.18617	2.83695e-05	0.000967964
DIRC3-AS1	169.565	2.41944	0.438267	5.52046	3.38119e-08	2.83136e-06
IL7R	657.117	2.41057	0.475866	5.06565	4.07016e-07	2.52527e-05
INHBA	9400.94	2.40815	0.54986	4.37957	1.18916e-05	0.000468067
GLI2	373.772	2.3989	0.58021	4.13454	3.55669e-05	0.00116098
RP11-353N4.6	33.0858	2.39142	0.583804	4.09628	4.1985e-05	0.00133643
VLDLR-AS1	69.2363	2.38974	0.460348	5.19116	2.08991e-07	1.42425e-05
LGALS3BP	91.6729	2.37933	0.529327	4.49501	6.95656e-06	0.00029415
H2BS1	23.3674	2.37867	0.543551	4.37617	1.20784e-05	0.000474689
NIBAN1	6117.93	2.36806	0.545584	4.34042	1.42209e-05	0.000538252
TBILA	51.0038	2.36767	0.449522	5.26707	1.38615e-07	9.78474e-06
RAB33A	54.5085	2.36378	0.447854	5.27802	1.30588e-07	9.39939e-06
WBP2NL	15.8045	2.35965	0.709952	3.32368	0.000888381	0.0163782
TBILA	51.7125	2.35878	0.456901	5.16256	2.43596e-07	1.63401e-05
HLA-F	38.2834	2.35736	0.599833	3.93003	8.49362e-05	0.00238641
IFIH1	1306.17	2.35135	0.405606	5.79711	6.74663e-09	6.70061e-07
PAPPA	736.507	2.33081	0.427005	5.4585	4.80167e-08	3.86912e-06
RP11-543C4.1	13.3761	2.32182	0.759895	3.05545	0.00224724	0.0342757
ACHE	49.2554	2.31083	0.388958	5.94107	2.83171e-09	3.15183e-07
ANKRD26P1	15.9763	2.30311	0.772793	2.98024	0.00288023	0.0411847
EN2	26.5527	2.2962	0.745434	3.08036	0.00206754	0.0321277
CPED1	119.584	2.29458	0.498504	4.60293	4.16598e-06	0.00018827
CH507-42P11.1	22.569	2.29426	0.560894	4.09037	4.30691e-05	0.00136584
H3P4	12.1483	2.29238	0.700485	3.27257	0.00106575	0.0189708
WWC1	17.0868	2.2912	0.669577	3.42187	0.00062193	0.0123156
CH17-195P21.2	39.9031	2.27409	0.503486	4.51668	6.28161e-06	0.000270067
RP13-766D20.2	14.6487	2.26958	0.757293	2.99697	0.00272682	0.0397225
RP11-242C19.2	21.939	2.25515	0.657502	3.42987	0.000603878	0.0120606
MIR3142HG	331.097	2.24892	0.527145	4.26622	1.98813e-05	0.00071752
RNU1-28P	48.3212	2.24768	0.759127	2.96087	0.00306768	0.0432386
ASPHD1	59.4187	2.24673	0.400172	5.61441	1.97239e-08	1.74278e-06
SLC34A3	51.4854	2.22128	0.521819	4.25681	2.07368e-05	0.000742124
KRTAP5-1	17.0352	2.20761	0.669297	3.2984	0.000972372	0.0175589
RGS9	19.5516	2.2027	0.617706	3.56593	0.000362564	0.00797454
CXCL11	100.921	2.20078	0.358636	6.13654	8.43407e-10	1.06987e-07
RRAGD	110.216	2.19278	0.500069	4.38495	1.16014e-05	0.000458755
BCL2A1	449.79	2.18789	0.262154	8.34582	7.07218e-17	2.70474e-14
TYMP	339.236	2.16061	0.318548	6.78268	1.17964e-11	2.12866e-09
GK-AS1	26.0598	2.15981	0.567659	3.80477	0.000141936	0.0036479
WI2-87327B8.2	91.1979	2.15204	0.358533	6.00233	1.94503e-09	2.23495e-07
EPHA5	272.042	2.15084	0.43879	4.90174	9.49895e-07	5.24571e-05
KRTAP5-1	16.4395	2.14607	0.683453	3.14005	0.00168921	0.0273259
RP11-499E18.1	12.8263	2.14179	0.68021	3.14871	0.00163993	0.0266803
PTPRR	115.682	2.14056	0.492704	4.34451	1.39584e-05	0.000531457
SERPINE2	4342.39	2.13899	0.417361	5.12504	2.97478e-07	1.92489e-05
H2BC12	303.405	2.13503	0.293922	7.26394	3.75978e-13	8.92043e-11
AC069155.1	16.8362	2.13147	0.709476	3.00429	0.00266201	0.0391569
CHPF	88.6846	2.1263	0.358852	5.92528	3.11768e-09	3.41399e-07
PSMB9	25.8009	2.12549	0.641473	3.31345	0.000921515	0.0168303
HLA-F	39.2718	2.12038	0.486166	4.36142	1.29222e-05	0.000497922
SOD2	10351.1	2.11793	0.32215	6.57436	4.88642e-11	7.54275e-09
PARP8	23.5861	2.11764	0.659598	3.2105	0.00132503	0.0225687
ALOXE3	26.8031	2.11639	0.602855	3.51062	0.00044706	0.00939742
ISL2	42.2168	2.11272	0.544525	3.87994	0.000104481	0.00282493
RELB	1543.2	2.10758	0.319782	6.59069	4.3779e-11	6.82277e-09
FENDRR	302.499	2.10123	0.484718	4.33495	1.45792e-05	0.000549311
AOX1	56.2802	2.06437	0.558709	3.69489	0.000219982	0.00532374
ASIC3	70.8899	2.06175	0.404981	5.09097	3.56233e-07	2.25944e-05
INHBA-AS1	21.182	2.0569	0.696884	2.95156	0.0031617	0.0442708
ASNS	253.907	2.05215	0.515723	3.97916	6.91583e-05	0.00202991
LINC00973	186.962	2.04648	0.384251	5.3259	1.00454e-07	7.46095e-06
LINC00571	26.7149	2.04615	0.555629	3.68259	0.000230877	0.00556015
CTD-2561B21.5	68.3757	2.04468	0.479818	4.26136	2.03185e-05	0.000729189
H2BC5	63.5634	2.03846	0.518991	3.92775	8.57451e-05	0.00240387
NFKB2	2960.11	2.03692	0.305074	6.6768	2.44217e-11	4.03731e-09
MARCHF4	4239.25	2.03369	0.386025	5.26829	1.37698e-07	9.75803e-06
HLA-F	34.0963	2.02976	0.552739	3.67219	0.000240483	0.00574291
RP11-98F14.12	32.1036	2.01838	0.447533	4.51002	6.48211e-06	0.000277687
PCDH10	5062.42	-2.00101	0.52504	-3.81115	0.000138319	0.00357699
PDGFRL	140.037	-2.00171	0.455923	-4.39045	1.13117e-05	0.000448512
CCBE1	205.931	-2.00595	0.374046	-5.36284	8.1923e-08	6.2476e-06
PIK3R3	442.599	-2.00719	0.337882	-5.94051	2.84137e-09	3.15183e-07
RP11-424C20.2	176.178	-2.00743	0.564754	-3.55452	0.000378672	0.00824391
DAPK2	81.0691	-2.0077	0.352295	-5.69891	1.20577e-08	1.11716e-06
PHEX	307.28	-2.00954	0.329239	-6.1036	1.03704e-09	1.25345e-07
PIF1	139.439	-2.01069	0.584357	-3.44086	0.000579865	0.0116904
EMCN	5418.92	-2.0245	0.321219	-6.30256	2.92762e-10	3.97287e-08
ACKR4	64.8238	-2.03191	0.680791	-2.98463	0.00283926	0.0408038
CPA3	59.5882	-2.03229	0.424629	-4.78603	1.70115e-06	8.84182e-05
ADAMTS16	44.0177	-2.03587	0.556145	-3.66069	0.000251542	0.00595153
CAV1	37681.7	-2.03905	0.220525	-9.24636	2.32259e-20	1.29378e-17
TRBC2	1498.79	-2.04071	0.283315	-7.20297	5.89136e-13	1.30138e-10
GIMAP7	431.344	-2.04906	0.283672	-7.22332	5.07333e-13	1.17116e-10
SYT16	26.2267	-2.06363	0.522847	-3.9469	7.91684e-05	0.00226155
THSD7A	824.905	-2.06609	0.326697	-6.32419	2.54564e-10	3.50696e-08
PEG10	4291.57	-2.07162	0.285042	-7.26776	3.65508e-13	8.75305e-11
GUCY1A1	144.24	-2.07583	0.568126	-3.65382	0.000258367	0.0060682
RP11-251M1.1	172.996	-2.07847	0.3107	-6.68962	2.23748e-11	3.74727e-09
BCL2L11	878.643	-2.08081	0.430265	-4.83612	1.32399e-06	7.02399e-05
CREB3L1	96.6033	-2.09963	0.347259	-6.04629	1.4822e-09	1.77476e-07
CLDN7	630.214	-2.09986	0.495929	-4.23419	2.29376e-05	0.000806244
SUCNR1	18.7971	-2.10728	0.687218	-3.06638	0.00216665	0.0334246
SULT1C4	220.368	-2.11109	0.431973	-4.88709	1.02339e-06	5.59132e-05
ZNF366	27.1766	-2.11504	0.54174	-3.90416	9.45546e-05	0.00259964
DOK6	12.0601	-2.12033	0.708548	-2.9925	0.00276703	0.0401032
PDE1C	96.7552	-2.12327	0.552436	-3.84346	0.00012131	0.0032079
AFAP1L1	2710.08	-2.12462	0.341793	-6.21611	5.09639e-10	6.69692e-08
TM4SF18	1975	-2.12609	0.520894	-4.08163	4.47216e-05	0.00140607
MRAP2	43.1165	-2.13016	0.664686	-3.20476	0.00135177	0.0228782
CHST1	2323.08	-2.1411	0.327317	-6.54136	6.09624e-11	9.29822e-09
KRT19	826.97	-2.14124	0.371579	-5.76255	8.28539e-09	8.07243e-07
CLDN7	651.182	-2.14424	0.502732	-4.26517	1.99747e-05	0.000719875
GPC5	14.8015	-2.14692	0.73361	-2.92651	0.00342788	0.0472741
SELL	59.0045	-2.1512	0.708831	-3.03485	0.00240654	0.0363163
LINC02360	20.3834	-2.15225	0.544283	-3.95429	7.67635e-05	0.00220583
LINC01235	3413.19	-2.15373	0.33957	-6.34251	2.26052e-10	3.13101e-08
ITGBL1	134.485	-2.16005	0.41695	-5.1806	2.21169e-07	1.49531e-05
PDE3A	1701.4	-2.16121	0.316467	-6.82918	8.53993e-12	1.5857e-09
RP11-495O11.1	17.9957	-2.16896	0.629408	-3.44603	0.000568889	0.0114962
ARHGAP11B	181.185	-2.17041	0.674849	-3.21614	0.00129928	0.0222359
CRYBG1	1139.11	-2.17208	0.292149	-7.43484	1.04692e-13	2.85387e-11
GIMAP4	3576	-2.17412	0.321188	-6.76899	1.29682e-11	2.30761e-09
TRIP13	540.87	-2.17504	0.576746	-3.77122	0.00016245	0.00409952
NOTCH4	2003.72	-2.17993	0.474006	-4.59896	4.2461e-06	0.000191216
CLEC4M	33.2626	-2.18099	0.542456	-4.02059	5.80527e-05	0.00175005
TMEFF1	229.373	-2.18625	0.425229	-5.14134	2.72786e-07	1.78769e-05
CGNL1	7840.49	-2.18908	0.285443	-7.66909	1.73226e-14	5.16132e-12
MEF2C	1867.67	-2.19224	0.32379	-6.77057	1.28274e-11	2.29853e-09
LINC02767	55.9537	-2.2063	0.385017	-5.7304	1.00193e-08	9.54403e-07
CNTNAP3C	1200.92	-2.2063	0.248807	-8.86752	7.47912e-19	3.68548e-16
TSPAN13	580.138	-2.21265	0.511687	-4.32422	1.53072e-05	0.000572601
AC002066.1	16.5311	-2.21293	0.676416	-3.27155	0.0010696	0.0189934
CALCRL	3920.53	-2.21901	0.296144	-7.493	6.73185e-14	1.91663e-11
KIF26A	271.909	-2.22291	0.436065	-5.09766	3.43874e-07	2.1919e-05
EPHB6	411.848	-2.22757	0.279984	-7.95606	1.776e-15	5.83169e-13
NR5A2	201.1	-2.22868	0.462613	-4.81759	1.45305e-06	7.66111e-05
ASIC1	59.241	-2.23274	0.379649	-5.88106	4.07659e-09	4.31647e-07
EPHB6	442.464	-2.23582	0.274077	-8.15763	3.41651e-16	1.23302e-13
CNTNAP3	3834.31	-2.23898	0.260991	-8.57877	9.58961e-18	4.38793e-15
EFNB3	99.5346	-2.25141	0.434684	-5.17943	2.2257e-07	1.50083e-05
NOTCH4	2320.6	-2.2534	0.509685	-4.42116	9.81712e-06	0.000394904
RASSF2	2484.54	-2.26903	0.398084	-5.69988	1.19893e-08	1.11714e-06
NOTCH4	2136.75	-2.27452	0.500908	-4.5408	5.60424e-06	0.000244223
PIK3C2B	2176.69	-2.28413	0.31924	-7.1549	8.37317e-13	1.80297e-10
RP11-29G8.3	55.7606	-2.29102	0.4932	-4.64522	3.39709e-06	0.0001609
AC006129.2	18.2048	-2.29123	0.601798	-3.8073	0.000140493	0.00362537
PCDH19	156.753	-2.29377	0.463066	-4.95343	7.29159e-07	4.16124e-05
ARL14EPL	31.5036	-2.29878	0.610589	-3.76486	0.000166644	0.00418635
NOTCH4	1181.85	-2.3018	0.492365	-4.675	2.93958e-06	0.000142389
AC006129.2	18.3439	-2.30486	0.601844	-3.82967	0.000128318	0.00337579
TRBC2	1956.23	-2.30579	0.307836	-7.49031	6.87135e-14	1.93485e-11
CEACAM21	27.3718	-2.30684	0.570531	-4.04333	5.26983e-05	0.00160183
SESN3	401.887	-2.30955	0.603465	-3.82716	0.000129632	0.0033964
RP11-9G1.3	63.9443	-2.31028	0.525739	-4.39434	1.11109e-05	0.000441403
CEACAM21	27.1781	-2.31486	0.551864	-4.19463	2.73323e-05	0.000938824
AUNIP	44.5014	-2.3217	0.727063	-3.19326	0.00140677	0.0236685
XRCC2	148.546	-2.32263	0.644132	-3.60583	0.000311151	0.0070308
RP11-363E6.3	25.3712	-2.32929	0.566688	-4.11035	3.95063e-05	0.00126539
RNF144A	588.779	-2.33236	0.45197	-5.16044	2.46368e-07	1.64399e-05
NOTCH4	2246.41	-2.36049	0.465495	-5.07092	3.95899e-07	2.46226e-05
SPINT1	31.2667	-2.36207	0.506152	-4.66672	3.06048e-06	0.000147409
NEK10	445.55	-2.36283	0.319714	-7.39043	1.46354e-13	3.80589e-11
TNFSF10	194.094	-2.36508	0.512035	-4.61897	3.85647e-06	0.000178695
ERCC6L	152.869	-2.36919	0.642117	-3.68966	0.000224557	0.00542323
FRMD3	632.223	-2.37447	0.388256	-6.11574	9.61126e-10	1.18403e-07
VIPR1	226.706	-2.37585	0.580706	-4.09132	4.28932e-05	0.00136195
SELENBP1	54.5051	-2.37598	0.662588	-3.58591	0.000335909	0.00747814
FABP5P11	23.3832	-2.3837	0.737824	-3.23072	0.0012348	0.0212924
HTR2B	109.754	-2.38545	0.367761	-6.48641	8.79029e-11	1.2945e-08
ANGPT2	10374.4	-2.392	0.41098	-5.82024	5.87628e-09	5.95154e-07
RP11-672A2.4	23.122	-2.39777	0.589051	-4.07056	4.68996e-05	0.00145667
MYO5C	405.607	-2.403	0.502555	-4.78157	1.73929e-06	8.96731e-05
DRAXIN	57.9768	-2.4108	0.790321	-3.05041	0.00228527	0.0347731
MLIP	52.5675	-2.41546	0.435427	-5.54734	2.90053e-08	2.45291e-06
RNF125	68.8274	-2.42067	0.396528	-6.10465	1.03026e-09	1.25116e-07
GIPC2	76.5593	-2.4212	0.661973	-3.65755	0.000254639	0.00600264
RP11-394O4.7	39.1247	-2.42187	0.597477	-4.0535	5.04564e-05	0.00154838
NOTCH4	2288.83	-2.42406	0.473092	-5.12386	2.99344e-07	1.93209e-05
ADGRE5	174.066	-2.43429	0.513686	-4.73887	2.1491e-06	0.000109047
ATP5F1AP7	17.0218	-2.43919	0.708478	-3.44286	0.000575597	0.0116135
VAT1L	168.018	-2.44707	0.472088	-5.1835	2.17763e-07	1.47618e-05
NTSR1	465.559	-2.45108	0.612137	-4.00414	6.22437e-05	0.00186324
PPP1R16B	3612.45	-2.45249	0.334126	-7.34003	2.1355e-13	5.36472e-11
FAM107A	360.265	-2.45901	0.365711	-6.72391	1.7691e-11	3.04237e-09
NOTCH4	2118.61	-2.46395	0.487506	-5.05419	4.32218e-07	2.64323e-05
PIEZO2	794.81	-2.47174	0.299048	-8.26535	1.39284e-16	5.24855e-14
GIMAP8	1550.16	-2.47443	0.243611	-10.1573	3.07488e-24	2.71692e-21
CYP26B1	101.188	-2.47841	0.736001	-3.3674	0.000758811	0.0144456
HID1	1339.16	-2.48918	0.289226	-8.60635	7.54262e-18	3.51404e-15
ABCA4	215.181	-2.49906	0.413577	-6.04254	1.51702e-09	1.80801e-07
C6orf141	73.7301	-2.50033	0.676068	-3.69833	0.00021702	0.00526602
NPTX1	840.2	-2.51425	0.298627	-8.41939	3.7845e-17	1.51522e-14
CHRNA1	192.62	-2.5179	0.553411	-4.54979	5.36996e-06	0.000236426
C20orf204	494.088	-2.52547	0.450012	-5.612	2.00003e-08	1.74911e-06
LINC01091	24.4455	-2.5375	0.576801	-4.39927	1.08617e-05	0.000432174
UCP2	193.878	-2.53848	0.589613	-4.30533	1.66739e-05	0.000616299
AC004538.3	18.3636	-2.54316	0.691221	-3.67922	0.000233947	0.00561724
LINC01121	18.4308	-2.54351	0.637344	-3.9908	6.58515e-05	0.00194848
KIAA0040	835.38	-2.55214	0.372997	-6.84226	7.79542e-12	1.45803e-09
PCDH18	36.7449	-2.57068	0.562882	-4.56699	4.94773e-06	0.000220727
BCRP3	18.2319	-2.58953	0.583441	-4.43838	9.06368e-06	0.000369821
SLC22A31	19.5504	-2.59255	0.791234	-3.27659	0.0010507	0.0187265
ORC1	131.052	-2.59345	0.653332	-3.96957	7.2001e-05	0.00209416
LINC01605	18.7534	-2.59714	0.658264	-3.94544	7.96528e-05	0.00227033
SH3TC2	205.102	-2.59741	0.321217	-8.08615	6.15781e-16	2.13227e-13
CIT	668.893	-2.60249	0.576254	-4.51621	6.29561e-06	0.000270215
SFXN2	232.674	-2.61444	0.492359	-5.31002	1.0961e-07	8.07084e-06
ACOX2	34.913	-2.65666	0.492284	-5.3966	6.79145e-08	5.30561e-06
SLC7A8	103.423	-2.66375	0.568857	-4.68263	2.8322e-06	0.00013797
CACNG6	582.921	-2.67157	0.317292	-8.4199	3.7682e-17	1.51522e-14
COLEC12	1545.23	-2.67183	0.336404	-7.94232	1.98434e-15	6.35585e-13
ADGRF5	7676.06	-2.68301	0.899936	-2.98133	0.00286999	0.0410842
MMRN1	19087.7	-2.68318	0.491836	-5.45544	4.88519e-08	3.92407e-06
CASP4LP	405.752	-2.6909	0.351884	-7.64712	2.05526e-14	6.05332e-12
DNAH8	564.005	-2.69157	0.364227	-7.38981	1.47043e-13	3.80589e-11
SEC24AP1	10.1194	-2.70046	0.819946	-3.29346	0.000989636	0.0177954
ABCA9	270.132	-2.70751	0.248004	-10.9172	9.5417e-28	1.22248e-24
PKD1L1	93.5518	-2.70794	0.506765	-5.34359	9.1126e-08	6.82752e-06
IL34	30.0122	-2.7346	0.578284	-4.72881	2.25834e-06	0.000113913
SLC44A3	8.5476	-2.73511	0.858218	-3.18696	0.00143777	0.0240166
TENM4	80.8097	-2.73977	0.586247	-4.6734	2.96249e-06	0.000143228
ELMOD1	454.467	-2.74415	0.578443	-4.74403	2.09508e-06	0.000106941
TRBC1	115.586	-2.75264	0.67475	-4.0795	4.51322e-05	0.00141303
CTD-2515H24.2	29.4227	-2.76274	0.621091	-4.44821	8.65873e-06	0.000354994
LINC02694	27.5755	-2.77558	0.556736	-4.98546	6.18149e-07	3.60807e-05
RP11-436K8.1	25.9195	-2.7868	0.815134	-3.41883	0.000628912	0.0124346
LHX6	253.471	-2.80812	0.475438	-5.90639	3.49696e-09	3.78084e-07
LDB2	2219.93	-2.81218	0.292842	-9.60308	7.75911e-22	5.23209e-19
TMC1	33.5465	-2.81301	0.576385	-4.88044	1.05847e-06	5.7707e-05
HID1-AS1	11.9551	-2.81853	0.746556	-3.77538	0.000159764	0.00404426
TSPAN18	2157.53	-2.82309	0.442548	-6.37918	1.78038e-10	2.48524e-08
DCN	24.477	-2.8257	0.669152	-4.22281	2.41274e-05	0.000841394
ATP5F1AP10	21.1988	-2.82611	0.728183	-3.88104	0.00010401	0.00281729
PTPN22	326.883	-2.82749	0.334663	-8.44876	2.94404e-17	1.21674e-14
RHAG	8.33613	-2.836	0.90682	-3.12741	0.00176353	0.0282253
CD200	116.124	-2.84348	0.441145	-6.44568	1.15084e-10	1.65669e-08
MYRIP	839.001	-2.8448	0.425856	-6.68019	2.38636e-11	3.97066e-09
CASC8	18.7405	-2.84983	0.686096	-4.15369	3.27161e-05	0.0010859
RP11-342D14.1	53.4669	-2.85053	0.507913	-5.61225	1.99715e-08	1.74911e-06
NLRP12	19.7738	-2.85063	0.685374	-4.15923	3.19327e-05	0.00106477
SETBP1	175.822	-2.8515	0.505489	-5.64107	1.68992e-08	1.51938e-06
CPXM1	46.3573	-2.85216	0.491375	-5.80446	6.45755e-09	6.48895e-07
PCDH15	77.8342	-2.85305	0.554419	-5.14602	2.66064e-07	1.74811e-05
OLFML2B	25.2389	-2.85883	0.627586	-4.55527	5.23176e-06	0.000231136
ATP5F1AP8	10.5149	-2.88514	0.910721	-3.16797	0.00153506	0.0251952
CD24	47.4369	-2.90276	0.803114	-3.61438	0.000301069	0.00685398
ABCG2	264.695	-2.91168	0.449332	-6.48001	9.17137e-11	1.32772e-08
LXN	3127.29	-2.91523	0.257762	-11.3098	1.17378e-29	1.76923e-26
RCAN2	29.4828	-2.93281	0.541731	-5.41378	6.1708e-08	4.85032e-06
PLPPR1	43.1366	-2.93762	0.524674	-5.59895	2.15656e-08	1.86688e-06
PLPPR1	42.1266	-2.93842	0.525403	-5.5927	2.23568e-08	1.92239e-06
MIR924HG	18.9725	-2.94896	0.859483	-3.43108	0.000601185	0.0120162
HIF3A	11.6839	-2.94933	0.833073	-3.5403	0.000399666	0.00860591
NFIA-AS2	65.202	-2.95418	0.67052	-4.40581	1.0539e-05	0.000419985
APOB	117.88	-2.95994	0.552743	-5.35501	8.55521e-08	6.48576e-06
E2F8	167.613	-2.97891	0.545247	-5.46341	4.67064e-08	3.79938e-06
TNR	31.3048	-2.98129	0.613912	-4.85622	1.19649e-06	6.42742e-05
RP11-538I12.3	48.2548	-2.98692	0.485139	-6.15683	7.42141e-10	9.55609e-08
ITGA11	236.811	-2.99418	0.315072	-9.50317	2.036e-21	1.21327e-18
SNTG1	11.7633	-2.99868	0.788549	-3.80278	0.000143079	0.00367361
GUCY1A2	349.084	-3.00102	0.47468	-6.3222	2.57866e-10	3.53345e-08
PODN	14.0932	-3.00208	0.706294	-4.25047	2.13325e-05	0.000757144
CHST15	510.819	-3.00822	0.234187	-12.8454	9.13112e-38	2.59973e-34
SOX18	9205.72	-3.01991	0.425289	-7.10085	1.23989e-12	2.56218e-10
ACSM3	147.363	-3.03568	0.474907	-6.39215	1.63565e-10	2.30285e-08
LINC01358	896.66	-3.03847	0.434622	-6.99107	2.7279e-12	5.37689e-10
ADGRF5P1	14.1967	-3.05794	0.949693	-3.21992	0.00128225	0.022007
RP11-396D16.1	158.627	-3.06034	0.546382	-5.60109	2.13007e-08	1.8502e-06
RP11-145M4.1	16.1608	-3.07381	0.723173	-4.25045	2.13338e-05	0.000757144
RAB17	8.99378	-3.08017	0.967121	-3.18488	0.00144813	0.0241689
KCNF1	9.10963	-3.09844	0.87908	-3.52464	0.000424059	0.0090175
COL1A2	75.7466	-3.10168	0.542493	-5.71746	1.08131e-08	1.02621e-06
METTL7A	65.0646	-3.10457	0.777539	-3.99281	6.52935e-05	0.00193644
SCUBE1-AS1	7.85227	-3.12199	0.994064	-3.14063	0.00168585	0.0273062
MYO7A	30.3325	-3.1617	0.596055	-5.30438	1.13057e-07	8.27703e-06
TMEM71	62.816	-3.16588	0.766646	-4.12953	3.63513e-05	0.00117907
COL14A1	13.6714	-3.18374	0.833084	-3.82164	0.000132568	0.00345216
KLRG1	117.965	-3.18485	0.620842	-5.12989	2.89913e-07	1.88752e-05
MGP	399.172	-3.20771	0.956896	-3.3522	0.000801721	0.0150611
MAP2K6	421.737	-3.22802	0.550939	-5.85911	4.65347e-09	4.84717e-07
NPR1	13.0349	-3.28831	0.925466	-3.55314	0.00038066	0.00827314
A2M	45.693	-3.29328	0.444134	-7.41505	1.21579e-13	3.24514e-11
ABCA6	448.904	-3.29456	0.466868	-7.05672	1.70483e-12	3.46703e-10
GGT5	2302.25	-3.30258	0.242203	-13.6356	2.45999e-42	1.57587e-38
LINC02452	17.9916	-3.31271	0.715956	-4.62698	3.71041e-06	0.000172865
GNG2	87.3294	-3.31378	0.490443	-6.75671	1.41157e-11	2.4774e-09
SCUBE1	336.34	-3.31797	0.283878	-11.688	1.46812e-31	2.50795e-28
KIAA0895LP1	7.08843	-3.32588	1.10363	-3.01358	0.00258189	0.0383083
CYP2AC1P	6.45659	-3.32974	1.08813	-3.06007	0.00221287	0.0339537
ABCA8	98.9613	-3.34215	0.658286	-5.07704	3.83351e-07	2.40171e-05
AIF1L	50.6244	-3.34397	0.501276	-6.67092	2.54198e-11	4.14876e-09
AWAT2	6.21646	-3.36197	1.11709	-3.00958	0.00261612	0.0386506
ARHGAP28	1404.66	-3.38475	0.409802	-8.25948	1.46312e-16	5.43347e-14
FILIP1	160.433	-3.40507	0.442783	-7.69016	1.46952e-14	4.43e-12
DACH1	516.911	-3.42805	0.421273	-8.13735	4.0401e-16	1.43783e-13
TRBJ2-1	11.9421	-3.4321	0.862911	-3.97736	6.96852e-05	0.00204304
SLC16A9	23.5046	-3.43402	1.16583	-2.94556	0.00322375	0.044943
TRBJ2-1	21.3837	-3.48559	0.675344	-5.1612	2.45368e-07	1.64159e-05
LINC02669	31.8919	-3.49714	0.678011	-5.15794	2.49683e-07	1.66179e-05
ARL11	20.9253	-3.51622	0.667225	-5.26991	1.36488e-07	9.71494e-06
STON2	9.67479	-3.54826	1.07451	-3.3022	0.000959283	0.0173715
CREG2	251.592	-3.57572	0.441889	-8.0919	5.87429e-16	2.06196e-13
KCNN4	13.3299	-3.57861	0.825582	-4.33466	1.45988e-05	0.000549311
CD34	2099.18	-3.60279	0.452923	-7.95454	1.79794e-15	5.83169e-13
MS4A6A	22.9132	-3.61122	0.714259	-5.0559	4.28367e-07	2.63225e-05
TRBJ2-2P	8.01616	-3.61818	1.01489	-3.56509	0.000363728	0.00799328
DIPK2B	5541.16	-3.62965	0.494144	-7.34532	2.05269e-13	5.20774e-11
ADAMTS18	2508.72	-3.63522	0.455864	-7.97434	1.53196e-15	5.09805e-13
DLL4	773.358	-3.65821	0.429358	-8.5202	1.59279e-17	7.1603e-15
NEURL1B	10.0174	-3.69518	1.09374	-3.37849	0.000728859	0.0139793
CASP12	56.5674	-3.6974	0.547828	-6.74919	1.4867e-11	2.59152e-09
LIMCH1	202.325	-3.72227	1.25923	-2.956	0.00311659	0.0437827
GPRIN3	271.246	-3.75786	0.395825	-9.49374	2.22894e-21	1.29806e-18
CCM2L	111.876	-3.76175	0.514102	-7.31714	2.53314e-13	6.24126e-11
RFX8	60.3918	-3.77548	0.599053	-6.30242	2.93034e-10	3.97287e-08
AK5	214.067	-3.7782	0.482777	-7.82598	5.03729e-15	1.57409e-12
RAB27B	12.2121	-3.81502	1.02164	-3.73421	0.000188304	0.00465295
RP11-145M4.2	27.5557	-3.8306	0.713787	-5.36658	8.02447e-08	6.13788e-06
TRBJ2-2P	8.66066	-3.85466	1.04864	-3.67586	0.000237052	0.00567683
ACTR1AP1	13.8588	-3.86153	1.04908	-3.68088	0.000232435	0.00558716
KLK6	44.5888	-3.93094	0.559845	-7.02148	2.19526e-12	4.39463e-10
UNC5A	41.5665	-3.96981	0.637867	-6.22358	4.85943e-10	6.41845e-08
ITGA10	1179.78	-4.11487	0.429127	-9.58893	8.90005e-22	5.84756e-19
AQP1	14.9089	-4.15399	0.885811	-4.68948	2.73896e-06	0.000134193
APOL4	11.01	-4.18468	1.0033	-4.17091	3.03384e-05	0.00101753
COL24A1	21.0493	-4.22436	0.785088	-5.38074	7.41782e-08	5.70794e-06
RP11-547J14.1	9.05593	-4.23	1.11496	-3.79387	0.000148319	0.0037741
SNCB	8.65901	-4.24841	1.09422	-3.88261	0.000103343	0.00280515
SPTA1	40.3227	-4.27726	0.779745	-5.48546	4.12383e-08	3.39772e-06
LINC00460	6.26634	-4.30922	1.27531	-3.37897	0.000727591	0.0139759
CLDN10-AS1	18.2363	-4.31544	1.04334	-4.13617	3.53155e-05	0.00115424
KIT	723.39	-4.31727	0.508128	-8.49643	1.95508e-17	8.491e-15
IRAG1	60.874	-4.34936	0.6083	-7.15002	8.67645e-13	1.85271e-10
ACE	1350.23	-4.38041	0.335425	-13.0593	5.62473e-39	1.8016e-35
COL3A1	36.7857	-4.46679	0.884582	-5.0496	4.42731e-07	2.68192e-05
SEMA3G	363.385	-4.50777	0.626214	-7.19844	6.09033e-13	1.33383e-10
RIBC2	12.0782	-4.56455	1.37351	-3.32326	0.000889708	0.0163896
RP1-310O13.7	36.2677	-4.59034	0.899072	-5.10565	3.29664e-07	2.11183e-05
RGS7BP	60.3107	-4.67199	0.818191	-5.71015	1.12878e-08	1.06338e-06
LUM	99.6549	-4.77517	0.540516	-8.83448	1.00568e-18	4.86217e-16
ABCA9-AS1	13.9779	-4.7957	1.01571	-4.72151	2.34095e-06	0.000117387
KCNK2	8.64155	-4.86586	1.24152	-3.91928	8.88156e-05	0.0024818
ACP5	146.879	-4.8722	0.462636	-10.5314	6.19126e-26	6.34579e-23
IGFBP5	143.58	-4.88372	0.564628	-8.64945	5.17476e-18	2.45552e-15
MYCN	27.2265	-4.88708	0.932921	-5.23847	1.61914e-07	1.13049e-05
FAM74A4	26.9117	-4.90502	1.04125	-4.71072	2.46841e-06	0.000122341
PALD1	573.081	-5.03793	0.954341	-5.27896	1.2992e-07	9.37768e-06
SETBP1-DT	6.25338	-5.11968	1.43957	-3.5564	0.000375974	0.00821492
RP3-431P23.5	6.44497	-5.19026	1.61063	-3.22251	0.00127073	0.0218386
PRSS2	6.35529	-5.20512	1.48484	-3.5055	0.000455744	0.00953306
FAM74A6	26.7301	-5.21229	1.09961	-4.74011	2.13597e-06	0.000108596
SSTR5	13.8672	-5.3741	1.49185	-3.6023	0.000315418	0.00710216
FCMR	13.7764	-5.45739	1.33864	-4.0768	4.56593e-05	0.0014216
CD36	36.6672	-5.57123	0.855568	-6.51173	7.42902e-11	1.11322e-08
POSTN	9.50795	-5.72712	1.60208	-3.57479	0.000350504	0.00773585
CCDC178	10.3752	-5.84745	1.48816	-3.9293	8.51927e-05	0.002391
ACSM1	11.1331	-5.98985	1.36939	-4.3741	1.21933e-05	0.000478471
PRSS2	12.2789	-6.16319	1.39796	-4.40871	1.03986e-05	0.000415038
FAM74A1	13.6799	-6.25766	1.50833	-4.14874	3.34305e-05	0.0011039
SCN10A	8.01526	-6.50118	1.38723	-4.68645	2.77989e-06	0.00013568
RP11-100L22.1	8.13192	-6.5036	1.44754	-4.49288	7.02668e-06	0.000295652
PRND	20.9467	-6.91166	1.25426	-5.51053	3.57746e-08	2.97626e-06
GJA4	57.6006	-7.23305	1.63676	-4.41912	9.91018e-06	0.0003974
LYVE1	5035.65	-7.45069	1.14911	-6.48388	8.93921e-11	1.30147e-08
CCL14	16.6133	-7.55216	1.29604	-5.82709	5.64016e-09	5.73506e-07
CCL14	16.6133	-7.55216	1.29604	-5.82709	5.64016e-09	5.73506e-07
FAM74A3	35.4146	-7.65984	1.40503	-5.45174	4.98787e-08	3.99404e-06

## Sheet: snRNA-seq Snc-KD in HT
gene_name	p_val	avg_logFC (LNAvsScr)	pct.1 (HT LNA-S)	pct.2 (HT Scr)	p_val_adj
FAM155A	0	-0.593873	0.703	0.86	0
IFI44L	0	-0.582034	0.251	0.555	0
XAF1	0	-0.507128	0.372	0.637	0
CCL2	6.4045e-286	-0.44148	0.663	0.832	1.58082e-281
MX1	3.57376e-305	-0.42465	0.254	0.505	8.82112e-301
B2M	1.87373e-163	-0.413626	0.392	0.56	4.62494e-159
EPSTI1	1.07322e-243	-0.403521	0.312	0.53	2.64904e-239
PLA2G4C	1.98814e-110	-0.384621	0.539	0.657	4.90733e-106
AC012668.3	1.00437e-56	-0.373439	0.429	0.517	2.4791e-52
SLC7A2	7.68214e-130	-0.371984	0.57	0.7	1.89618e-125
AL590006.1	9.21878e-128	-0.369502	0.534	0.641	2.27547e-123
PARP14	1.08062e-178	-0.344045	0.609	0.722	2.6673e-174
RNF213	1.61798e-152	-0.332526	0.76	0.812	3.99366e-148
CXCL8	1.7097e-113	-0.331935	0.554	0.68	4.22004e-109
IFI44	2.50221e-221	-0.331916	0.332	0.537	6.17621e-217
DDX60L	1.04725e-144	-0.325519	0.646	0.736	2.58492e-140
IGFBP7	1.59047e-170	-0.318414	0.751	0.856	3.92576e-166
IFI6	1.01719e-200	-0.313755	0.199	0.395	2.51074e-196
ICAM1	1.20108e-76	-0.311304	0.511	0.615	2.96462e-72
MCTP1	1.25365e-98	-0.30424	0.816	0.883	3.09439e-94
IFI27	1.10789e-144	-0.298058	0.316	0.482	2.7346e-140
PLA2R1	2.76551e-170	-0.293151	0.755	0.83	6.82611e-166
C15orf53	1.01183e-82	-0.291767	0.523	0.611	2.49751e-78
AC007513.1	2.61442e-118	-0.290732	0.731	0.793	6.45318e-114
FAR2	2.60045e-130	-0.285837	0.739	0.806	6.41869e-126
CXCL1	9.64993e-80	-0.279356	0.415	0.532	2.38189e-75
CHSY3	1.86261e-105	-0.274394	0.359	0.503	4.59749e-101
ST6GAL1	2.30674e-91	-0.260478	0.816	0.859	5.69372e-87
SAMD12	3.33993e-65	-0.259403	0.483	0.582	8.24394e-61
AC011511.2	9.9383e-64	-0.259358	0.35	0.448	2.45307e-59
STAT1	2.83815e-113	-0.255324	0.419	0.545	7.00541e-109
SLF1	1.28468e-81	-0.254534	0.268	0.382	3.17098e-77
MMP1	9.92548e-46	-0.252986	0.534	0.631	2.44991e-41
AC017101.1	2.30807e-83	-0.25259	0.56	0.648	5.69701e-79
CASC15	3.8002e-71	-0.249321	0.781	0.852	9.38004e-67
TLE4	6.03613e-101	-0.248916	0.439	0.558	1.4899e-96
WSB1	5.8022e-108	-0.248579	0.796	0.834	1.43216e-103
AC023590.1	6.9516e-90	-0.248443	0.222	0.34	1.71586e-85
KCND2	3.22424e-51	-0.247996	0.107	0.185	7.9584e-47
LINC01204	1.13961e-51	-0.246772	0.387	0.476	2.8129e-47
LAMA2	4.14339e-60	-0.240249	0.343	0.435	1.02271e-55
PARP9	1.01431e-124	-0.239576	0.312	0.46	2.50361e-120
AC124319.2	1.9114e-86	-0.236275	0.397	0.502	4.71791e-82
AC013652.1	4.56085e-58	-0.235129	0.737	0.782	1.12576e-53
CFAP54	2.08965e-138	-0.233461	0.857	0.892	5.15789e-134
PLSCR1	4.29631e-99	-0.233276	0.381	0.499	1.06046e-94
AF117829.1	2.74001e-57	-0.231835	0.555	0.632	6.76317e-53
FRMD6-AS2	7.27651e-102	-0.231367	0.296	0.426	1.79606e-97
MAGI2	6.25356e-82	-0.230339	0.633	0.721	1.54357e-77
RBMS3-AS2	4.39248e-91	-0.228214	0.319	0.441	1.08419e-86
AC007402.1	8.98412e-25	-0.226867	0.224	0.281	2.21755e-20
HDAC9	7.92018e-82	-0.222755	0.712	0.77	1.95494e-77
LRMDA	1.21008e-33	-0.220831	0.564	0.621	2.98684e-29
CAV2	1.54072e-62	-0.220451	0.596	0.656	3.80295e-58
AC009313.1	3.42449e-52	-0.217553	0.532	0.606	8.45268e-48
AL078459.1	1.57317e-63	-0.21663	0.646	0.709	3.88306e-59
ANKIB1	1.53591e-96	-0.213932	0.773	0.817	3.7911e-92
PHF21A	8.34634e-101	-0.212915	0.71	0.769	2.06013e-96
FTH1	2.95626e-28	-0.212863	0.535	0.589	7.29695e-24
THBS1	2.00121e-105	-0.21007	0.886	0.938	4.93958e-101
AP003086.2	1.0594e-67	-0.209414	0.582	0.659	2.61491e-63
CTGF	6.33902e-50	-0.208945	0.714	0.764	1.56466e-45
HERC6	2.66263e-108	-0.207291	0.271	0.41	6.57216e-104
SP100	1.04888e-131	-0.206918	0.856	0.871	2.58894e-127
LTB	4.6948e-50	-0.206093	0.151	0.234	1.15882e-45
SAT1	2.24875e-46	-0.205666	0.712	0.767	5.55059e-42
ADGRA3	1.61659e-95	-0.204334	0.532	0.653	3.99023e-91
LINC00607	1.45012e-38	-0.203951	0.721	0.782	3.57934e-34
EIF2AK2	5.02357e-104	-0.203528	0.616	0.707	1.23997e-99
AC090124.1	3.76903e-33	-0.202315	0.267	0.338	9.30309e-29
FHIT	1.66993e-55	-0.202147	0.547	0.623	4.12189e-51
DDX58	6.34931e-69	-0.200182	0.731	0.775	1.5672e-64
AL139807.1	9.70604e-50	-0.199431	0.424	0.503	2.39574e-45
SP110	6.44992e-85	-0.199267	0.325	0.446	1.59203e-80
RANBP17	8.72823e-70	-0.199003	0.852	0.875	2.15439e-65
AC027288.3	3.59093e-58	-0.19799	0.473	0.561	8.86349e-54
DDX60	1.19176e-93	-0.195937	0.31	0.438	2.94162e-89
SNCAIP	1.45459e-25	-0.190497	0.41	0.472	3.59035e-21
CHN1	2.24774e-66	-0.189198	0.697	0.751	5.5481e-62
FBXL7	4.34102e-54	-0.188093	0.929	0.939	1.07149e-49
TMSB4X	2.74708e-19	-0.186184	0.647	0.684	6.78061e-15
SAMD9L	5.12491e-72	-0.184474	0.337	0.444	1.26498e-67
AC090673.1	1.72343e-29	-0.184251	0.508	0.564	4.25394e-25
PTCHD4	5.90804e-39	-0.182865	0.435	0.508	1.45828e-34
LINC01524	2.77315e-58	-0.182058	0.399	0.502	6.84497e-54
TRAF3IP2-AS1	6.67619e-101	-0.180377	0.263	0.399	1.64788e-96
TXNDC5	1.22541e-67	-0.17924	0.118	0.213	3.02468e-63
IL1RAPL1	7.2297e-38	-0.178502	0.554	0.631	1.78451e-33
AL138828.1	6.48318e-34	-0.177982	0.413	0.477	1.60024e-29
AC004551.1	1.1858e-125	-0.177134	0.143	0.282	2.9269e-121
FAM196A	1.35777e-75	-0.176182	0.28	0.39	3.35138e-71
NAALADL2	4.80495e-54	-0.175996	0.526	0.611	1.18601e-49
GMDS-DT	1.72602e-48	-0.175313	0.434	0.514	4.26033e-44
PRSS23	1.34225e-75	-0.174794	0.831	0.871	3.31306e-71
MYSM1	3.39134e-47	-0.173637	0.472	0.539	8.37083e-43
DDX5	4.39387e-66	-0.172764	0.743	0.788	1.08454e-61
DHRS3	6.27368e-47	-0.172604	0.288	0.38	1.54853e-42
PAM	1.12876e-78	-0.172558	0.722	0.774	2.78612e-74
CXCL2	7.44486e-35	-0.171528	0.293	0.364	1.83762e-30
MYO6	2.54279e-63	-0.170139	0.801	0.827	6.27638e-59
NFIA	1.68657e-56	-0.169375	0.688	0.755	4.16295e-52
TFPI2	8.10232e-20	-0.168974	0.615	0.666	1.9999e-15
DPYD-AS1	3.11219e-90	-0.167478	0.159	0.277	7.68182e-86
AUTS2	6.8262e-13	-0.166875	0.291	0.333	1.68491e-08
AP000311.1	4.92759e-50	-0.166287	0.634	0.7	1.21628e-45
AC074033.1	4.68041e-61	-0.166215	0.273	0.37	1.15527e-56
NBAT1	2.265e-85	-0.16606	0.177	0.293	5.59069e-81
LINC00513	2.88826e-50	-0.165876	0.644	0.705	7.12909e-46
VCAM1	1.78824e-50	-0.163882	0.057	0.121	4.4139e-46
WWOX	9.89268e-44	-0.163151	0.496	0.574	2.44181e-39
CLDN14	5.36871e-66	-0.162439	0.358	0.455	1.32516e-61
FBXL17	4.4275e-56	-0.162303	0.66	0.721	1.09284e-51
MMP10	6.33284e-47	-0.160787	0.119	0.196	1.56313e-42
BBS9	8.90355e-56	-0.160515	0.495	0.579	2.19766e-51
FBXL13	1.23722e-27	-0.16041	0.585	0.623	3.05382e-23
CCSER1	2.37689e-41	-0.158474	0.255	0.338	5.86688e-37
HSP90B1	1.72009e-31	-0.158342	0.489	0.547	4.24569e-27
AC058822.1	1.77724e-45	-0.158248	0.545	0.605	4.38676e-41
RORA	4.1569e-31	-0.157776	0.641	0.68	1.02605e-26
ZBTB20-AS5	2.44161e-60	-0.157495	0.356	0.452	6.02662e-56
ADD3	2.11631e-41	-0.157251	0.667	0.723	5.22368e-37
ISG15	6.67251e-58	-0.156747	0.108	0.191	1.64698e-53
NEK11	3.62787e-110	-0.153729	0.126	0.255	8.95468e-106
AC007099.1	7.22364e-41	-0.15291	0.409	0.483	1.78301e-36
GRN	2.10037e-15	-0.152843	0.165	0.205	5.18435e-11
FTX	7.88084e-107	-0.152537	0.9	0.912	1.94523e-102
LINC01239	5.03208e-60	-0.150167	0.146	0.237	1.24207e-55
Z99289.1	2.33068e-52	-0.149121	0.336	0.428	5.75281e-48
AC024145.1	6.60101e-58	-0.149119	0.288	0.382	1.62933e-53
THSD7A	4.06924e-26	-0.148909	0.396	0.456	1.00441e-21
NOX4	9.74492e-40	-0.148534	0.71	0.767	2.40534e-35
TRIM22	4.12097e-43	-0.14824	0.411	0.488	1.01718e-38
IL7	9.0892e-52	-0.147228	0.265	0.352	2.24349e-47
AP001831.1	4.62137e-47	-0.147205	0.339	0.425	1.14069e-42
EFNA1	5.9216e-36	-0.146612	0.33	0.399	1.46163e-31
RASSF3	1.99224e-57	-0.145698	0.791	0.819	4.91744e-53
RAI14	3.59469e-89	-0.145084	0.939	0.952	8.87276e-85
PDE4B	7.39976e-43	-0.144631	0.77	0.811	1.82648e-38
AC073571.1	9.20298e-40	-0.144175	0.416	0.485	2.27157e-35
SAMHD1	2.56191e-51	-0.144111	0.276	0.365	6.32357e-47
CD69	8.84956e-16	-0.143524	0.256	0.305	2.18434e-11
SERPINE1	2.52109e-71	-0.142484	0.995	0.999	6.2228e-67
ADAR	2.1541e-48	-0.142287	0.594	0.654	5.31696e-44
CAB39	2.36464e-40	-0.141879	0.807	0.825	5.83664e-36
PLD1	3.65823e-45	-0.141469	0.814	0.846	9.0296e-41
ST5	9.05481e-26	-0.140953	0.455	0.51	2.235e-21
MMP14	1.72085e-21	-0.140677	0.374	0.426	4.24758e-17
AC103853.1	1.50124e-61	-0.139114	0.274	0.375	3.70551e-57
MBD5	1.8774e-49	-0.138482	0.79	0.819	4.63399e-45
TNKS	2.97235e-42	-0.138124	0.714	0.748	7.33666e-38
CNKSR3	6.88607e-16	-0.13792	0.592	0.622	1.69969e-11
CLDN11	2.23144e-29	-0.137654	0.41	0.471	5.50787e-25
PTPRK	2.06683e-94	-0.137398	0.991	0.996	5.10156e-90
DIAPH2-AS1	1.02793e-24	-0.137298	0.411	0.466	2.53723e-20
OAS3	3.91515e-78	-0.137104	0.216	0.332	9.66376e-74
NBEA	4.34516e-37	-0.137072	0.603	0.657	1.07252e-32
ZC3H7B	6.10054e-28	-0.136836	0.748	0.767	1.5058e-23
AL603840.1	9.06884e-53	-0.135915	0.05	0.112	2.23846e-48
NUTM2A-AS1	1.7436e-49	-0.135744	0.549	0.62	4.30374e-45
CRMP1	2.11922e-38	-0.13558	0.322	0.395	5.23086e-34
PDGFB	8.23166e-28	-0.134804	0.33	0.394	2.03182e-23
CALR	1.08298e-07	-0.133892	0.224	0.251	0.00267312
NCOA7	9.30502e-38	-0.132958	0.771	0.799	2.29676e-33
IFIH1	1.15191e-53	-0.132819	0.199	0.289	2.84326e-49
AP002518.2	2.56472e-34	-0.132776	0.218	0.288	6.3305e-30
PLCB1	5.32544e-26	-0.132684	0.847	0.871	1.31448e-21
CD55	3.30834e-12	-0.132371	0.414	0.448	8.16599e-08
AL356277.3	1.38558e-19	-0.132066	0.16	0.206	3.42004e-15
MAP3K1	3.90487e-33	-0.131992	0.635	0.687	9.6384e-29
ZBTB20	6.7329e-61	-0.131766	0.855	0.877	1.66188e-56
RALA	5.00034e-61	-0.131696	0.913	0.929	1.23423e-56
AC009554.1	1.15931e-41	-0.131233	0.333	0.412	2.86153e-37
AL133480.1	6.83539e-34	-0.130438	0.404	0.471	1.68718e-29
OAS1	1.13958e-73	-0.130242	0.127	0.229	2.81283e-69
PAPPA	5.8513e-06	-0.129947	0.153	0.176	0.144428
TRIM56	1.8242e-28	-0.129395	0.543	0.592	4.50267e-24
ACTB	7.38616e-05	-0.129379	0.535	0.546	1
SOX5	2.43432e-19	-0.129104	0.206	0.257	6.00863e-15
FOXP1	1.44401e-45	-0.128989	0.88	0.893	3.56425e-41
SQSTM1	5.74728e-31	-0.128624	0.815	0.842	1.4186e-26
LURAP1L-AS1	7.10598e-28	-0.128586	0.379	0.444	1.75397e-23
HLA-B	1.0008e-43	-0.128136	0.076	0.139	2.47027e-39
RELN	2.46634e-24	-0.127767	0.271	0.338	6.08766e-20
AC090673.2	9.11051e-30	-0.127637	0.272	0.334	2.24875e-25
TCF4-AS1	1.31547e-37	-0.127268	0.296	0.373	3.24697e-33
ITGB1-DT	1.50086e-24	-0.127185	0.482	0.53	3.70456e-20
SOD2	3.22752e-24	-0.126944	0.194	0.251	7.96648e-20
AC008892.1	1.48724e-31	-0.126847	0.464	0.528	3.67096e-27
PLCB4	3.16061e-43	-0.126608	0.418	0.499	7.80133e-39
SAMD5	2.39801e-26	-0.125813	0.564	0.619	5.91902e-22
TMED9	4.24191e-19	-0.12575	0.119	0.162	1.04703e-14
RASA1	5.08217e-45	-0.125613	0.672	0.718	1.25443e-40
ABCA6	2.12087e-38	-0.125564	0.211	0.288	5.23495e-34
GLIS3	1.81907e-31	-0.125395	0.469	0.541	4.49001e-27
AC010737.1	5.66612e-09	-0.125183	0.21	0.239	0.000139857
TMLHE-AS1	4.38062e-47	-0.125017	0.216	0.3	1.08127e-42
AC025211.1	6.35886e-37	-0.124914	0.291	0.367	1.56956e-32
BST2	3.66054e-44	-0.124675	0.129	0.204	9.03532e-40
TMSB10	0.000173919	-0.124479	0.431	0.445	1
PSAP	1.11913e-08	-0.123268	0.491	0.511	0.000276235
NUTM2B-AS1	1.1769e-47	-0.123242	0.604	0.662	2.90495e-43
COL25A1	6.61122e-21	-0.123156	0.208	0.264	1.63185e-16
DGLUCY	3.34243e-42	-0.123017	0.527	0.592	8.25012e-38
AC104779.1	9.95522e-41	-0.122908	0.195	0.27	2.45725e-36
AL136985.3	8.96805e-37	-0.122693	0.672	0.724	2.21358e-32
ITGAV	1.49632e-40	-0.122276	0.863	0.885	3.69337e-36
SYT14	6.19014e-23	-0.122011	0.395	0.455	1.52791e-18
AC001226.2	3.88565e-44	-0.121614	0.305	0.387	9.59094e-40
TNFRSF10B	8.96876e-32	-0.121494	0.796	0.817	2.21376e-27
PTGS2	3.09038e-17	-0.121346	0.427	0.474	7.62797e-13
AC114689.3	1.75317e-22	-0.121016	0.186	0.242	4.32736e-18
DNMBP-AS1	8.12224e-30	-0.120787	0.431	0.49	2.00481e-25
TRIM14	9.77607e-45	-0.119753	0.247	0.328	2.41303e-40
AC023051.1	1.93208e-50	-0.119322	0.233	0.324	4.76895e-46
AL033504.1	4.47356e-24	-0.119087	0.41	0.468	1.10421e-19
GPC5	6.34298e-05	-0.11855	0.568	0.586	1
RARB	7.73866e-26	-0.117972	0.746	0.771	1.91013e-21
P4HB	6.54394e-05	-0.117899	0.482	0.498	1
PRELID2	2.79499e-27	-0.11752	0.46	0.521	6.89888e-23
USP31	1.59501e-17	-0.117279	0.634	0.662	3.93697e-13
HLA-E	2.73245e-22	-0.116911	0.36	0.415	6.74449e-18
HHIP-AS1	7.5121e-22	-0.116494	0.429	0.482	1.85421e-17
CD59	4.59502e-13	-0.116357	0.5	0.532	1.13419e-08
WWTR1	1.15895e-32	-0.116194	0.897	0.905	2.86063e-28
NR2F2-AS1	3.84602e-34	-0.115967	0.41	0.48	9.49314e-30
ABHD15-AS1	2.23632e-21	-0.115892	0.445	0.494	5.5199e-17
CTHRC1	1.08299e-23	-0.115765	0.216	0.273	2.67313e-19
C19orf66	4.66246e-44	-0.114988	0.264	0.345	1.15083e-39
AC027097.2	3.20967e-20	-0.114815	0.51	0.552	7.92243e-16
VPS13C	8.16343e-28	-0.114737	0.784	0.796	2.01498e-23
AP001528.2	6.0154e-33	-0.114418	0.429	0.49	1.48478e-28
IGF1R	1.81144e-32	-0.114072	0.823	0.84	4.47117e-28
ABCA9	5.06876e-34	-0.113787	0.158	0.226	1.25112e-29
PDE4D	4.22926e-36	-0.113593	0.918	0.935	1.04391e-31
CAV1	7.55933e-15	-0.11353	0.603	0.64	1.86587e-10
LTBP1	8.51314e-15	-0.112351	0.619	0.653	2.1013e-10
AGRN	5.9421e-12	-0.112288	0.302	0.335	1.46669e-07
AC012409.2	1.77283e-57	-0.112013	0.158	0.248	4.37588e-53
ENO4	6.5029e-36	-0.111616	0.37	0.441	1.60511e-31
HRH1	8.56288e-28	-0.111523	0.768	0.792	2.11357e-23
RAB13	0.00277742	-0.111372	0.261	0.273	1
F2RL1	5.32884e-21	-0.110975	0.446	0.492	1.31532e-16
MT-ATP8	7.77775e-09	-0.110724	0.913	0.953	0.000191978
SUMF1	3.76198e-28	-0.110617	0.509	0.566	9.28569e-24
CFLAR-AS1	1.47922e-28	-0.110576	0.382	0.443	3.65116e-24
AC002066.1	3.80532e-17	-0.110354	0.236	0.282	9.39268e-13
IMMP2L	1.83698e-30	-0.10999	0.736	0.776	4.53423e-26
JAK1	4.11174e-32	-0.109983	0.778	0.801	1.0149e-27
LRIG3	2.68396e-10	-0.10986	0.509	0.531	6.62481e-06
DTNA	2.7266e-25	-0.109796	0.708	0.748	6.73006e-21
AL157871.4	1.95591e-32	-0.109217	0.266	0.335	4.82777e-28
STAT2	3.29644e-32	-0.109128	0.365	0.432	8.13661e-28
SDK1	1.34557e-15	-0.108885	0.52	0.569	3.32128e-11
SRPX2	2.73643e-23	-0.108885	0.723	0.75	6.75432e-19
TMEM144	4.08068e-19	-0.108623	0.307	0.359	1.00724e-14
CTSB	5.0146e-08	-0.108452	0.553	0.569	0.00123775
AC011092.2	3.86306e-36	-0.108451	0.237	0.309	9.53519e-32
CEP112	6.17572e-22	-0.108284	0.636	0.67	1.52435e-17
GLI3	2.19883e-19	-0.108207	0.456	0.505	5.42737e-15
COLEC12	3.10825e-20	-0.10814	0.277	0.338	7.67209e-16
SLC44A5	4.86037e-28	-0.108006	0.192	0.257	1.19969e-23
ELF2	3.40777e-22	-0.107576	0.684	0.711	8.41139e-18
TRIM25	7.07487e-20	-0.107314	0.39	0.44	1.74629e-15
MAPK10	6.20537e-30	-0.107277	0.287	0.354	1.53167e-25
PARP12	6.47211e-28	-0.106915	0.478	0.534	1.59751e-23
AC107021.1	1.3874e-14	-0.106755	0.479	0.521	3.42452e-10
TNFAIP2	4.79564e-27	-0.106532	0.193	0.252	1.18371e-22
DIO2-AS1	6.55384e-21	-0.106386	0.29	0.346	1.61768e-16
AC007319.1	4.57115e-32	-0.105857	0.661	0.724	1.1283e-27
BCAS3	1.67617e-24	-0.105512	0.686	0.72	4.1373e-20
ZC3HAV1	7.42902e-25	-0.105316	0.569	0.613	1.83371e-20
LRRC49	2.11524e-30	-0.1053	0.442	0.508	5.22106e-26
XRN1	6.22289e-21	-0.105028	0.665	0.683	1.536e-16
RBMS3	7.77023e-27	-0.104894	0.601	0.655	1.91793e-22
AL133415.1	1.24281e-30	-0.104829	0.375	0.442	3.06764e-26
USP18	2.58974e-38	-0.104783	0.254	0.33	6.39225e-34
PFN1	0.0652709	-0.104619	0.263	0.267	1
FABP5	5.75404e-11	-0.104495	0.273	0.307	1.42027e-06
ZC2HC1A	1.22626e-18	-0.104309	0.412	0.458	3.02679e-14
EEF1A1	4.78707e-06	-0.104241	0.661	0.687	0.118159
PNPT1	1.50028e-22	-0.104197	0.451	0.498	3.70313e-18
CTSS	5.30161e-09	-0.104168	0.337	0.369	0.00013086
DPH6	1.40215e-13	-0.104102	0.377	0.417	3.46093e-09
FRAS1	9.32585e-13	-0.1039	0.189	0.228	2.3019e-08
ANKRD55	7.14948e-34	-0.103439	0.248	0.319	1.76471e-29
CYR61	4.63708e-15	-0.103367	0.699	0.715	1.14457e-10
PLSCR4	1.59914e-12	-0.103285	0.552	0.578	3.94715e-08
EFEMP1	1.07543e-31	-0.103082	0.88	0.912	2.65447e-27
FAM198B	4.21902e-15	-0.102836	0.519	0.56	1.04138e-10
AC006059.1	3.10862e-27	-0.102735	0.359	0.419	7.67301e-23
RAD51B	1.09368e-26	-0.102462	0.68	0.722	2.69954e-22
AC026316.5	2.55426e-24	-0.102416	0.157	0.211	6.30469e-20
DPYD	6.59712e-33	-0.102342	0.757	0.786	1.62837e-28
JPX	2.0804e-21	-0.101754	0.729	0.749	5.13504e-17
CPQ	9.72261e-17	-0.101708	0.578	0.605	2.39983e-12
TDRD7	2.53242e-27	-0.10165	0.32	0.382	6.25077e-23
HNRNPDL	3.04954e-17	-0.101599	0.546	0.583	7.52717e-13
WARS	9.21373e-15	-0.101549	0.505	0.542	2.27422e-10
AC010894.3	5.38909e-28	-0.101287	0.207	0.269	1.33019e-23
DOCK1	6.20864e-42	-0.100964	0.848	0.858	1.53248e-37
SH3TC1	8.33506e-09	-0.100768	0.504	0.524	0.000205734
SEMA6D	5.73614e-22	-0.100569	0.287	0.346	1.41585e-17
MYH9	9.87926e-16	0.10028	0.854	0.837	2.4385e-11
NID2	1.46364e-34	0.100303	0.111	0.062	3.6127e-30
CSE1L	2.27431e-26	0.10077	0.41	0.336	5.61367e-22
CDH2	2.21148e-05	0.10087	0.84	0.828	0.545858
RTN3	2.96391e-18	0.10103	0.711	0.671	7.31581e-14
NCEH1	9.20848e-19	0.101439	0.504	0.446	2.27293e-14
CDH13	1.25371e-07	0.101662	0.643	0.618	0.00309454
TMEM120B	3.92797e-26	0.10169	0.496	0.422	9.69541e-22
HK1	6.32943e-20	0.10185	0.675	0.626	1.56229e-15
MELK	5.79091e-10	0.102001	0.27	0.235	1.42937e-05
ARHGAP23	1.31538e-22	0.102196	0.594	0.529	3.24675e-18
FAM196B	1.5736e-11	0.102338	0.705	0.669	3.88411e-07
UBE2K	4.64525e-22	0.102407	0.848	0.819	1.14659e-17
LUZP1	1.3771e-20	0.102979	0.828	0.805	3.39911e-16
PREX1	7.5629e-23	0.103419	0.663	0.609	1.86675e-18
TNIK	4.53725e-11	0.103855	0.859	0.847	1.11993e-06
ADGRG6	3.00671e-24	0.103927	0.391	0.322	7.42146e-20
NVL	2.22138e-22	0.104253	0.644	0.58	5.48302e-18
MDM2	0.0811843	0.104491	0.706	0.7	1
C1orf21	3.32863e-15	0.104557	0.315	0.264	8.21606e-11
KIF20B	3.77015e-24	0.104771	0.191	0.136	9.30587e-20
MAPKBP1	4.59617e-17	0.10486	0.594	0.535	1.13447e-12
ANKRD11	1.69071e-25	0.104924	0.89	0.878	4.17319e-21
STK32B	1.31095e-08	0.105014	0.553	0.517	0.000323581
LMO7	7.0957e-15	0.105172	0.567	0.517	1.75143e-10
SHC3	9.02135e-14	0.1053	0.455	0.409	2.22674e-09
TSPAN5	4.81686e-17	0.106408	0.788	0.759	1.18894e-12
PODXL	1.2032e-11	0.106514	0.681	0.655	2.96986e-07
FBN2	3.31764e-06	0.106531	0.657	0.633	0.0818893
PDE3A	1.05535e-11	0.106707	0.751	0.715	2.60492e-07
FBLIM1	3.06913e-25	0.107135	0.736	0.692	7.57553e-21
PRAG1	5.97345e-20	0.107243	0.475	0.409	1.47443e-15
ZFAS1	1.76844e-23	0.107361	0.519	0.453	4.36504e-19
RTTN	4.96178e-32	0.107361	0.331	0.253	1.22472e-27
ECT2	7.87017e-29	0.107763	0.391	0.313	1.94259e-24
AC022075.1	3.43654e-09	0.107858	0.209	0.176	8.48241e-05
LRRFIP2	2.10049e-19	0.107891	0.807	0.784	5.18463e-15
SHLD2	1.77453e-20	0.107911	0.72	0.676	4.38007e-16
RNF149	5.42868e-19	0.10793	0.777	0.749	1.33996e-14
KNL1	3.90068e-23	0.108157	0.18	0.128	9.62804e-19
GATAD2A	4.90582e-23	0.108378	0.763	0.727	1.2109e-18
FAM219A	4.15229e-20	0.109645	0.621	0.571	1.02491e-15
CCDC138	2.54782e-28	0.109784	0.423	0.346	6.28878e-24
RCOR1	1.38242e-18	0.109895	0.742	0.701	3.41223e-14
ME1	2.66255e-08	0.109929	0.663	0.634	0.000657197
RASGRP3	2.60041e-07	0.110175	0.339	0.31	0.00641859
GBE1	2.07129e-16	0.110182	0.826	0.801	5.11257e-12
ZC3H3	3.93175e-08	0.110441	0.564	0.531	0.000970473
PLEKHG1	1.139e-07	0.110542	0.762	0.749	0.00281139
AXL	1.12212e-11	0.111102	0.586	0.548	2.76973e-07
TBC1D2	2.79085e-36	0.111833	0.261	0.188	6.88865e-32
DIAPH2	5.08724e-10	0.11193	0.863	0.853	1.25568e-05
FOSL1	5.84588e-10	0.112124	0.634	0.601	1.44294e-05
PRIM2	4.45423e-11	0.112409	0.541	0.504	1.09944e-06
GALNT13	2.65097e-10	0.112443	0.183	0.15	6.54339e-06
RGS5	8.50706e-24	0.113436	0.603	0.539	2.0998e-19
PTPRE	1.19526e-10	0.113491	0.781	0.757	2.95027e-06
CENPP	2.26348e-23	0.113827	0.367	0.298	5.58695e-19
ERGIC1	4.22156e-26	0.114019	0.579	0.512	1.04201e-21
POLA1	3.75869e-14	0.115512	0.363	0.315	9.27757e-10
PWWP2A	3.40713e-38	0.115767	0.568	0.487	8.40982e-34
TOX2	9.99684e-17	0.115919	0.308	0.257	2.46752e-12
LINC02407	2.89367e-23	0.116275	0.486	0.421	7.14245e-19
UAP1	3.53145e-15	0.116388	0.458	0.404	8.71669e-11
VCL	9.81784e-19	0.116857	0.794	0.766	2.42334e-14
STARD13	8.40898e-26	0.116923	0.871	0.853	2.07559e-21
LRRFIP1	1.54143e-27	0.117154	0.794	0.759	3.80471e-23
IQCJ-SCHIP1	1.42599e-18	0.11745	0.654	0.602	3.51977e-14
MICAL2	2.51311e-16	0.118353	0.624	0.575	6.20312e-12
MT-ND1	2.70688e-51	0.119058	0.984	0.993	6.6814e-47
CCBE1	5.19454e-12	0.119953	0.233	0.193	1.28217e-07
UBE2D2	1.96838e-26	0.120083	0.811	0.793	4.85856e-22
MAPK14	1.12177e-20	0.120485	0.708	0.659	2.76886e-16
TRAM2	3.61798e-24	0.120515	0.586	0.526	8.93027e-20
COL12A1	1.51742e-18	0.12078	0.592	0.54	3.74546e-14
SND1	1.24107e-26	0.120791	0.874	0.858	3.06332e-22
AC016205.1	4.14661e-09	0.121285	0.171	0.142	0.000102351
MT-ND4	1.00639e-51	0.121328	0.99	0.996	2.48408e-47
RTN4	7.49141e-31	0.121708	0.913	0.902	1.8491e-26
CBFB	1.9102e-25	0.121995	0.757	0.718	4.71495e-21
RAPGEF5	7.70529e-20	0.122796	0.696	0.649	1.9019e-15
TSC22D2	4.13279e-29	0.122991	0.734	0.689	1.0201e-24
CALCRL	7.54859e-18	0.123483	0.504	0.446	1.86322e-13
MYEOV	3.58499e-43	0.123705	0.34	0.251	8.84883e-39
FIGN	1.11124e-18	0.124079	0.522	0.464	2.74286e-14
ABCC4	1.13944e-17	0.124206	0.7	0.662	2.81248e-13
CLIC4	1.32136e-15	0.124501	0.848	0.832	3.26151e-11
ASAP1	4.78488e-48	0.125326	0.931	0.922	1.18105e-43
TXNRD1	1.4571e-15	0.126548	0.77	0.735	3.59656e-11
TUBB6	1.70423e-34	0.126579	0.807	0.775	4.20654e-30
PLOD2	5.27391e-11	0.126855	0.846	0.838	1.30176e-06
LMBR1	6.01213e-06	0.12715	0.7	0.679	0.148397
DACH1	0.000106683	0.127338	0.224	0.205	1
RUNX1	5.28744e-14	0.127577	0.776	0.755	1.3051e-09
CORO1C	1.35775e-25	0.127579	0.665	0.608	3.35134e-21
LINC01605	9.2225e-27	0.12814	0.234	0.173	2.27639e-22
MARCH4	1.52901e-17	0.128431	0.531	0.477	3.77406e-13
GULP1	8.88907e-17	0.128912	0.578	0.523	2.19409e-12
NR3C2	4.50711e-08	0.129175	0.672	0.648	0.00111249
RRAS2	1.81031e-23	0.129239	0.763	0.718	4.46839e-19
ANLN	1.21948e-21	0.131954	0.167	0.119	3.01003e-17
GPRC5A	4.77285e-21	0.132317	0.312	0.251	1.17808e-16
CARD11	2.06402e-22	0.134239	0.735	0.692	5.09462e-18
CENPE	1.88721e-26	0.134588	0.24	0.177	4.65819e-22
PLXNA4	1.61422e-10	0.135	0.308	0.268	3.98438e-06
RAB3B	1.23675e-40	0.135152	0.51	0.417	3.05267e-36
CIT	2.4882e-28	0.135869	0.304	0.233	6.14162e-24
SSFA2	1.60675e-14	0.136364	0.567	0.526	3.96593e-10
MAMDC2	6.75778e-10	0.137443	0.246	0.21	1.66802e-05
BCL2L1	4.05982e-27	0.137447	0.619	0.556	1.00209e-22
AC105402.3	0.000992317	0.138417	0.583	0.649	1
CYTOR	1.60252e-28	0.138587	0.791	0.754	3.95549e-24
UACA	1.2005e-27	0.138908	0.913	0.906	2.9632e-23
HP1BP3	9.8731e-37	0.143103	0.736	0.687	2.43698e-32
CAPN2	1.0031e-29	0.144144	0.744	0.697	2.47595e-25
AHNAK	2.43486e-30	0.148069	0.597	0.532	6.00996e-26
TGM2	2.17852e-26	0.148179	0.571	0.503	5.37724e-22
INPP4B	1.88197e-26	0.150713	0.412	0.343	4.64526e-22
EDIL3	2.20032e-22	0.15137	0.547	0.484	5.43104e-18
COL13A1	2.47475e-35	0.153364	0.644	0.571	6.10843e-31
SORBS2	3.19337e-26	0.154782	0.481	0.408	7.8822e-22
AC090833.1	6.46186e-12	0.155304	0.743	0.733	1.59498e-07
GLCE	4.79765e-45	0.15798	0.675	0.596	1.1842e-40
ZSWIM6	7.12381e-55	0.159166	0.947	0.936	1.75837e-50
UBASH3B	2.39743e-35	0.16026	0.588	0.511	5.91758e-31
MGAT5	9.39022e-32	0.160362	0.751	0.706	2.31779e-27
NRG1	5.18543e-15	0.161106	0.869	0.873	1.27992e-10
SLC4A8	6.25235e-39	0.161288	0.403	0.318	1.54327e-34
PLCL1	4.97497e-15	0.162964	0.601	0.55	1.22797e-10
RASGRF2	1.20539e-25	0.163109	0.613	0.55	2.97528e-21
ANKRD1	7.0106e-21	0.164729	0.725	0.702	1.73043e-16
TOX	1.53014e-19	0.164851	0.782	0.756	3.77685e-15
TLL1	5.69518e-14	0.166678	0.546	0.5	1.40574e-09
NEK7	1.54018e-19	0.169092	0.771	0.741	3.80163e-15
CEP128	3.80893e-29	0.170563	0.335	0.263	9.40158e-25
ADAMTS9	1.34708e-34	0.172916	0.559	0.486	3.32499e-30
CDH11	7.85748e-21	0.173932	0.722	0.692	1.93946e-16
GRB14	2.55859e-31	0.17712	0.399	0.325	6.31537e-27
TBCD	3.00237e-41	0.177476	0.745	0.695	7.41074e-37
ADGRL2	8.75372e-34	0.178441	0.655	0.591	2.16068e-29
AHNAK2	2.6696e-64	0.184579	0.459	0.349	6.58938e-60
C16orf74	8.72581e-52	0.184582	0.564	0.464	2.15379e-47
MTRNR2L8	4.16612e-10	0.18755	0.698	0.689	1.02832e-05
MT-ND3	1.34831e-131	0.193573	0.986	0.994	3.32802e-127
MT-ND2	3.41731e-111	0.194736	0.975	0.987	8.43494e-107
LIMK2	4.68969e-55	0.209298	0.792	0.748	1.15756e-50
NEAT1	1.70314e-76	0.212511	0.978	0.977	4.20386e-72
ABI3BP	9.07528e-16	0.213892	0.51	0.467	2.24005e-11
RASSF8	1.94872e-62	0.215848	0.795	0.746	4.81001e-58
MT-ND4L	5.31606e-102	0.217843	0.878	0.886	1.31216e-97
COL8A1	3.91139e-29	0.222921	0.55	0.488	9.65449e-25
CD44	1.2661e-44	0.223855	0.788	0.747	3.12512e-40
DIAPH3	1.63095e-25	0.22628	0.458	0.39	4.02567e-21
SULT1B1	2.39764e-39	0.247515	0.42	0.336	5.9181e-35
KITLG	1.42436e-61	0.250529	0.581	0.477	3.51574e-57
FLRT2	2.69459e-58	0.275995	0.826	0.788	6.65106e-54
NRXN3	8.68014e-59	0.322853	0.525	0.427	2.14252e-54
PLAT	5.71844e-43	0.336634	0.414	0.332	1.41148e-38
SLIT2	1.28352e-94	0.346909	0.777	0.691	3.1681e-90
PRICKLE1	1.05373e-122	0.410144	0.731	0.619	2.60092e-118

## Sheet: scRNA-seq Snc-KD in HT
gene_name	p_val	avg_logFC (LNAvsScr)	pct.1 (HT LNA-S)	pct.2 (HT Scr)	p_val_adj
ISG15	0	-0.685792	0.933	0.989	0
IGFBP7	0	-0.671499	0.881	0.986	0
IFI27	0	-0.615164	0.86	0.971	0
MX1	0	-0.606578	0.461	0.857	0
IFI6	0	-0.600368	0.686	0.946	0
FAM155A	2.94547e-180	-0.435846	0.589	0.771	6.8541e-176
BST2	3.88461e-241	-0.423465	0.811	0.908	9.03948e-237
IFI44L	0	-0.406697	0.286	0.686	0
SLC7A2	9.04734e-177	-0.351565	0.79	0.908	2.10532e-172
ICAM1	6.55826e-164	-0.338119	0.876	0.956	1.52611e-159
RNF213	1.25675e-235	-0.333934	0.868	0.948	2.92445e-231
CXCL8	2.8985e-85	-0.328109	0.829	0.917	6.74481e-81
IFIT1	0	-0.324833	0.197	0.529	0
MCTP1	1.67447e-69	-0.3155	0.766	0.873	3.89648e-65
XAF1	0	-0.314175	0.369	0.729	0
CST1	1.22849e-45	-0.307481	0.357	0.468	2.8587e-41
PARP14	0	-0.30608	0.824	0.948	0
ST6GAL1	4.14436e-112	-0.285202	0.833	0.924	9.64393e-108
EPSTI1	0	-0.28473	0.361	0.68	0
MMP10	2.3296e-78	-0.284412	0.405	0.555	5.42099e-74
HLA-B	2.48401e-154	-0.275366	0.717	0.876	5.7803e-150
HLA-C	1.00017e-192	-0.26647	0.872	0.948	2.32739e-188
LTB	1.13043e-77	-0.265337	0.697	0.835	2.63052e-73
PLA2G4C	1.37625e-123	-0.26362	0.489	0.667	3.20253e-119
OAS1	0	-0.261192	0.369	0.702	0
STAT1	4.57848e-273	-0.260734	0.768	0.913	1.06541e-268
PLSCR1	7.06973e-292	-0.256037	0.665	0.868	1.64513e-287
OAS3	2.53956e-295	-0.250323	0.522	0.783	5.90955e-291
CTHRC1	6.13388e-99	-0.246748	0.592	0.737	1.42735e-94
DDX58	2.00312e-170	-0.242474	0.801	0.915	4.66127e-166
PARP9	0	-0.236759	0.494	0.779	0
IFI35	9.50945e-281	-0.232524	0.407	0.681	2.21285e-276
EIF2AK2	2.63592e-229	-0.226672	0.872	0.955	6.13379e-225
IFIT3	1.41643e-249	-0.225806	0.165	0.425	3.29604e-245
LY6E	3.17046e-190	-0.224533	0.71	0.858	7.37767e-186
MT-CO1	1.59574e-276	-0.220513	0.968	0.99	3.7133e-272
PLA2R1	1.53417e-138	-0.217744	0.761	0.888	3.57001e-134
IFITM3	2.25757e-200	-0.21772	0.959	0.983	5.25337e-196
RMRP	1.4814e-78	-0.217287	0.562	0.697	3.44723e-74
AKAP12	7.90253e-65	-0.216105	0.958	0.982	1.83892e-60
IFI44	3.14824e-284	-0.213127	0.489	0.763	7.32596e-280
VWF	1.62705e-55	-0.212381	0.762	0.835	3.78614e-51
CASC15	5.21381e-60	-0.211071	0.695	0.815	1.21325e-55
ISG20	4.86059e-141	-0.210718	0.867	0.946	1.13106e-136
FAR2	5.83048e-113	-0.204464	0.754	0.886	1.35675e-108
RAI14	2.80498e-136	-0.201886	0.963	0.989	6.52718e-132
SP110	3.09599e-202	-0.200994	0.594	0.78	7.20437e-198
FBXL7	1.0098e-49	-0.200479	0.895	0.945	2.3498e-45
SP100	1.26039e-179	-0.198554	0.95	0.984	2.93292e-175
CXCL1	1.04733e-39	-0.196336	0.856	0.927	2.43714e-35
SOD2	5.17213e-70	-0.195222	0.648	0.758	1.20356e-65
DDX60L	4.68933e-146	-0.193711	0.659	0.816	1.09121e-141
SAMHD1	3.03719e-198	-0.191562	0.552	0.756	7.06754e-194
MT-CO3	1.77747e-186	-0.190262	0.967	0.988	4.13618e-182
B2M	3.7526e-182	-0.188897	0.98	0.992	8.73231e-178
OAS2	1.11511e-280	-0.187126	0.242	0.534	2.59485e-276
UBE2L6	1.30072e-232	-0.186786	0.326	0.591	3.02677e-228
MT-ND3	4.678e-167	-0.184479	0.961	0.986	1.08857e-162
SAMD9	3.41825e-123	-0.182788	0.576	0.735	7.95426e-119
CFAP54	4.41698e-62	-0.174169	0.837	0.912	1.02783e-57
IRF7	2.54876e-204	-0.174043	0.413	0.661	5.93096e-200
SAT1	2.23283e-48	-0.173572	0.934	0.968	5.19581e-44
USP18	1.23072e-155	-0.17336	0.626	0.791	2.86388e-151
ADD3	3.80465e-109	-0.172732	0.76	0.879	8.85341e-105
AC013652.1	4.70544e-42	-0.172349	0.681	0.777	1.09496e-37
NCOA7	7.31603e-96	-0.172051	0.898	0.954	1.70244e-91
PSME2	5.58226e-162	-0.17181	0.933	0.974	1.29899e-157
RALA	1.07462e-126	-0.169125	0.984	0.993	2.50064e-122
FABP5	3.19958e-12	-0.168236	0.976	0.988	7.44542e-08
ZC3H7B	4.55638e-94	-0.166196	0.875	0.946	1.06027e-89
CXCL2	6.55677e-33	-0.164063	0.466	0.558	1.52576e-28
IFIH1	9.05123e-197	-0.163805	0.451	0.688	2.10622e-192
HERC6	1.01545e-229	-0.162141	0.342	0.613	2.36294e-225
LINC00607	1.20109e-28	-0.159455	0.614	0.709	2.79494e-24
CCL2	3.0999e-74	-0.159442	0.954	0.985	7.21346e-70
SAMD9L	1.01437e-114	-0.157002	0.495	0.673	2.36043e-110
EFEMP1	3.98007e-76	-0.155272	0.958	0.983	9.26163e-72
CAV1	5.67813e-63	-0.154335	0.978	0.991	1.3213e-58
RHOB	2.64684e-72	-0.153255	0.834	0.921	6.15919e-68
IFI16	4.72476e-136	-0.150583	0.949	0.981	1.09945e-131
TAPBP	1.09304e-117	-0.149275	0.88	0.948	2.54351e-113
FOXP1	6.22071e-68	-0.14907	0.935	0.973	1.44756e-63
DDX60	1.21738e-170	-0.147082	0.371	0.602	2.83284e-166
LAP3	2.29291e-104	-0.146882	0.739	0.847	5.33561e-100
PDE4B	3.90389e-65	-0.145391	0.828	0.91	9.08435e-61
PTPRK	1.02278e-33	-0.145261	0.954	0.982	2.38001e-29
SMAD3	7.5357e-63	-0.144573	0.95	0.98	1.75356e-58
IL32	5.31037e-72	-0.144281	0.983	0.993	1.23572e-67
MT-CO2	1.82562e-140	-0.144238	0.976	0.992	4.24821e-136
CTSK	1.29155e-34	-0.14404	0.36	0.466	3.00544e-30
DTX3L	2.87112e-160	-0.143014	0.46	0.675	6.68109e-156
APBB2	1.54591e-45	-0.141398	0.948	0.979	3.59733e-41
ADAR	9.613e-119	-0.139988	0.876	0.947	2.23694e-114
VCAM1	1.8081e-53	-0.139948	0.138	0.241	4.20745e-49
PHF21A	2.35584e-93	-0.139369	0.621	0.762	5.48203e-89
FOXO1	6.80164e-45	-0.139028	0.92	0.963	1.58274e-40
ECE1	1.57838e-77	-0.137989	0.949	0.981	3.6729e-73
FTH1	3.746e-66	-0.13788	0.998	0.999	8.71693e-62
ANKIB1	9.39628e-93	-0.137632	0.816	0.911	2.18651e-88
SOX4	1.08666e-66	-0.137142	0.964	0.986	2.52867e-62
GBP4	2.13253e-85	-0.136806	0.288	0.442	4.96241e-81
PSME1	4.8065e-127	-0.1356	0.902	0.955	1.11847e-122
LRMDA	4.20198e-19	-0.135502	0.454	0.518	9.778e-15
PRSS23	2.22552e-107	-0.135355	0.968	0.986	5.17879e-103
CXCL6	2.61341e-42	-0.134695	0.28	0.391	6.08141e-38
WWTR1	8.27839e-51	-0.132424	0.953	0.981	1.92638e-46
HSPG2	2.05998e-65	-0.131238	0.957	0.986	4.79358e-61
ITGAV	6.5323e-57	-0.131203	0.945	0.98	1.52007e-52
IER3	7.84254e-36	-0.130617	0.937	0.97	1.82496e-31
FNDC3B	4.348e-38	-0.130321	0.962	0.987	1.01178e-33
NFIA	1.99481e-60	-0.129026	0.729	0.845	4.64193e-56
JAK1	6.35181e-87	-0.128829	0.959	0.987	1.47807e-82
PDGFB	2.77468e-60	-0.128737	0.549	0.691	6.45667e-56
SQSTM1	6.08872e-75	-0.128664	0.983	0.996	1.41684e-70
ZBTB20	1.24256e-47	-0.128547	0.878	0.931	2.89144e-43
HLA-A	7.00895e-72	-0.128374	0.938	0.973	1.63098e-67
MT-CYB	4.0539e-93	-0.127575	0.967	0.988	9.43343e-89
IGF1R	6.93734e-57	-0.127417	0.818	0.895	1.61432e-52
MYO6	7.58961e-71	-0.126664	0.89	0.944	1.7661e-66
THSD4	1.20854e-35	-0.12485	0.866	0.926	2.81226e-31
DOCK1	3.23243e-59	-0.124761	0.885	0.943	7.52186e-55
PAM	1.58817e-77	-0.124163	0.728	0.843	3.69566e-73
ZNFX1	9.25208e-91	-0.123344	0.687	0.813	2.15296e-86
PLD1	3.83106e-42	-0.122642	0.789	0.87	8.91488e-38
ADGRA3	4.01594e-108	-0.122037	0.545	0.733	9.3451e-104
TRIO	7.3232e-34	-0.121732	0.949	0.98	1.70411e-29
HELZ2	7.54111e-142	-0.121236	0.386	0.602	1.75482e-137
PSMB9	3.52742e-149	-0.120361	0.221	0.43	8.20831e-145
MAST4	8.57695e-44	-0.118586	0.895	0.949	1.99586e-39
IL4I1	1.23039e-105	-0.11806	0.504	0.671	2.86312e-101
RANBP17	3.69495e-28	-0.117	0.805	0.862	8.59814e-24
RASSF3	4.2381e-67	-0.116936	0.818	0.914	9.86206e-63
TLE4	8.29491e-95	-0.116081	0.451	0.623	1.93023e-90
WARS	4.09035e-68	-0.115506	0.849	0.921	9.51823e-64
PTGS2	3.86061e-38	-0.114896	0.625	0.723	8.98363e-34
ZNF618	1.20995e-62	-0.11475	0.898	0.954	2.81554e-58
SH3D19	1.38438e-55	-0.114339	0.86	0.923	3.22145e-51
SLC7A11	3.17289e-36	-0.113882	0.914	0.961	7.38331e-32
CD59	8.61615e-94	-0.113766	0.961	0.985	2.00498e-89
FHIT	1.34726e-40	-0.113758	0.445	0.551	3.13508e-36
IFIT5	3.22206e-150	-0.113533	0.237	0.452	7.49773e-146
SPOCK1	3.28082e-35	-0.113531	0.938	0.979	7.63447e-31
CTSB	6.97027e-43	-0.112711	0.952	0.981	1.62198e-38
DAAM1	1.75896e-50	-0.112642	0.923	0.963	4.0931e-46
TNFSF10	1.01082e-53	-0.112596	0.296	0.428	2.35219e-49
PLCB1	1.65949e-21	-0.112292	0.813	0.875	3.86163e-17
PRCP	2.47874e-66	-0.111683	0.808	0.899	5.76804e-62
EDN1	2.46996e-28	-0.111641	0.916	0.946	5.74759e-24
LIMS1	6.91155e-66	-0.111594	0.96	0.984	1.60832e-61
SELE	1.1106e-19	-0.110591	0.074	0.12	2.58436e-15
SLFN5	1.2804e-71	-0.110279	0.776	0.873	2.9795e-67
DHRS3	6.1171e-88	-0.109917	0.35	0.524	1.42345e-83
TCF4	8.91648e-52	-0.109902	0.955	0.981	2.07486e-47
C19orf66	3.2004e-95	-0.109561	0.518	0.683	7.44732e-91
HDAC9	6.08656e-53	-0.109321	0.637	0.756	1.41634e-48
SRPX2	1.62618e-60	-0.108923	0.776	0.864	3.78413e-56
PLA2G4A	1.76106e-45	-0.106856	0.559	0.666	4.09798e-41
SOX7	1.20362e-44	-0.106042	0.655	0.759	2.80083e-40
CXCL11	1.05627e-61	-0.105663	0.075	0.17	2.45793e-57
SVIL	1.39356e-38	-0.105559	0.947	0.977	3.24281e-34
CST3	1.25247e-34	-0.104861	0.964	0.982	2.91449e-30
TAP1	6.97248e-81	-0.104511	0.519	0.672	1.6225e-76
PLCG2	1.29398e-31	-0.104468	0.544	0.651	3.0111e-27
MAGI2	6.08805e-35	-0.104245	0.529	0.633	1.41669e-30
MACF1	3.38773e-34	-0.104135	0.963	0.986	7.88324e-30
BMP6	5.79263e-15	-0.103756	0.9	0.938	1.34795e-10
RORA	3.19593e-35	-0.103505	0.561	0.66	7.43694e-31
ETV6	9.0128e-33	-0.103084	0.921	0.959	2.09728e-28
ATP6V1A	9.34114e-74	-0.102852	0.736	0.856	2.17368e-69
SAMD12	3.23709e-37	-0.101875	0.408	0.515	7.5327e-33
IFI27L2	4.76976e-64	-0.10167	0.555	0.682	1.10992e-59
LINC01204	1.75951e-32	-0.101079	0.41	0.509	4.09439e-28
RIN2	3.93179e-40	-0.100382	0.913	0.959	9.14927e-36
TRAF1	1.56007e-42	-0.100228	0.541	0.656	3.63028e-38
PHLDA2	9.48478e-16	0.10034	0.908	0.928	2.20711e-11
CHORDC1	2.75786e-20	0.101087	0.776	0.771	6.41754e-16
CCT5	4.66206e-21	0.10143	0.948	0.97	1.08486e-16
RFK	8.98582e-35	0.10145	0.808	0.806	2.091e-30
LRRFIP2	9.74036e-38	0.101695	0.941	0.967	2.26658e-33
YWHAZ	3.9587e-50	0.101734	0.974	0.987	9.21188e-46
PSMD12	4.36762e-23	0.102038	0.905	0.924	1.01634e-18
HSPH1	1.23179e-21	0.102134	0.925	0.944	2.86638e-17
TOMM40	6.62633e-22	0.102169	0.788	0.795	1.54195e-17
RAN	1.38541e-39	0.102475	0.971	0.984	3.22385e-35
LYPD1	2.27104e-08	0.102659	0.784	0.808	0.000528472
CAP1	3.84982e-45	0.103367	0.959	0.976	8.95853e-41
RPL41	2.2977e-75	0.103452	0.993	0.997	5.34676e-71
SSFA2	3.45373e-19	0.104492	0.843	0.85	8.03684e-15
TGM2	1.65485e-23	0.104655	0.947	0.966	3.85082e-19
MRPL17	4.91259e-38	0.104808	0.897	0.913	1.14316e-33
ARPC5	4.22569e-47	0.105539	0.966	0.981	9.83319e-43
CDC37	2.88606e-39	0.105628	0.958	0.974	6.71587e-35
HIST1H1B	4.65189e-11	0.106365	0.165	0.126	1.08249e-06
PTX3	3.65599e-11	0.106373	0.932	0.958	8.50749e-07
RPS19BP1	8.57649e-47	0.106407	0.934	0.95	1.99575e-42
YBX3	8.01525e-41	0.107045	0.956	0.975	1.86515e-36
CNN3	7.56039e-38	0.107075	0.867	0.874	1.7593e-33
CCNB1	4.14688e-11	0.10716	0.446	0.402	9.64979e-07
MDK	1.41708e-05	0.107652	0.657	0.729	0.329754
ACTR3	2.7045e-44	0.107755	0.964	0.981	6.29336e-40
PROCR	1.64127e-40	0.107978	0.929	0.949	3.81923e-36
CCT6A	2.84058e-39	0.10805	0.959	0.976	6.61003e-35
HMGN1	2.82099e-57	0.108514	0.965	0.978	6.56445e-53
C1QBP	1.21974e-30	0.108528	0.955	0.974	2.83833e-26
PPDPF	1.08946e-23	0.108609	0.927	0.951	2.53517e-19
HNRNPA3	1.02666e-25	0.108855	0.968	0.982	2.38904e-21
DLGAP5	3.38057e-17	0.108895	0.387	0.323	7.86658e-13
SNHG7	8.8358e-18	0.108968	0.77	0.779	2.05609e-13
DIAPH3	1.65476e-08	0.109344	0.546	0.534	0.000385063
TNFRSF12A	2.23956e-19	0.109499	0.898	0.926	5.21147e-15
DDX21	1.44718e-19	0.109595	0.931	0.95	3.36759e-15
ZFAS1	5.0823e-18	0.109834	0.953	0.973	1.18265e-13
RSL1D1	9.01414e-18	0.110281	0.885	0.904	2.09759e-13
CXorf36	6.18665e-10	0.110443	0.593	0.579	1.43963e-05
TMPO	3.24736e-19	0.11157	0.659	0.628	7.55661e-15
SNX3	5.2914e-48	0.112327	0.957	0.976	1.23131e-43
SH3BGRL3	2.84671e-45	0.112378	0.986	0.991	6.62429e-41
SRM	3.00155e-40	0.112447	0.939	0.956	6.9846e-36
EBNA1BP2	7.88488e-23	0.112992	0.892	0.916	1.83481e-18
CCT4	5.14703e-41	0.11305	0.931	0.95	1.19771e-36
SET	4.01031e-28	0.113384	0.967	0.982	9.332e-24
RPL24	6.76862e-87	0.113748	0.984	0.989	1.57506e-82
CAPN2	2.10929e-41	0.11376	0.954	0.976	4.90832e-37
ARPC5L	2.95334e-52	0.113902	0.926	0.941	6.87243e-48
PCDH10	4.8748e-11	0.114072	0.634	0.621	1.13437e-06
GNG11	8.36305e-23	0.11454	0.992	0.995	1.94608e-18
GLCE	1.02971e-46	0.114802	0.821	0.808	2.39612e-42
BZW1	4.27001e-40	0.115167	0.962	0.98	9.93631e-36
ACTG1	3.33917e-72	0.115177	0.994	0.997	7.77026e-68
PA2G4	2.3088e-19	0.115557	0.953	0.971	5.37258e-15
TLL1	2.92247e-08	0.117369	0.541	0.514	0.000680059
MCAM	6.69791e-31	0.117458	0.958	0.981	1.5586e-26
CALM2	2.31623e-43	0.117839	0.973	0.984	5.38987e-39
CLSPN	6.33112e-19	0.118187	0.48	0.42	1.47325e-14
HSPE1	1.8326e-43	0.118212	0.958	0.979	4.26445e-39
UAP1	1.65358e-24	0.118812	0.791	0.784	3.84788e-20
PHF19	2.44584e-21	0.119006	0.665	0.628	5.69146e-17
HNRNPAB	3.94077e-37	0.119066	0.957	0.979	9.17016e-33
DDX3X	9.00994e-25	0.119964	0.942	0.961	2.09661e-20
PPM1G	2.62781e-39	0.120469	0.954	0.973	6.1149e-35
CSRP1	3.22808e-42	0.120637	0.89	0.902	7.51174e-38
TPX2	6.08153e-13	0.120944	0.531	0.494	1.41517e-08
TMSB4X	3.42019e-44	0.122259	0.999	1	7.95878e-40
TOP2A	4.44503e-17	0.12256	0.294	0.234	1.03436e-12
YES1	1.38871e-30	0.122594	0.912	0.927	3.23154e-26
RPS10	1.59699e-72	0.122664	0.952	0.972	3.7162e-68
TXNRD1	2.81937e-29	0.122835	0.967	0.984	6.56066e-25
DNAJC9	6.38788e-41	0.1234	0.672	0.61	1.48646e-36
SOX18	0.658165	0.123606	0.454	0.477	1
TOX	1.10832e-11	0.123698	0.771	0.773	2.57907e-07
DEK	1.3883e-20	0.124203	0.935	0.951	3.23058e-16
EEF1B2	1.98821e-87	0.124288	0.979	0.987	4.62656e-83
CDH11	3.44413e-22	0.124422	0.826	0.832	8.01449e-18
AC090833.1	3.81586e-10	0.125939	0.687	0.682	8.8795e-06
UBE2S	5.8663e-18	0.126017	0.904	0.918	1.36509e-13
LMO7	1.89894e-35	0.126097	0.741	0.701	4.41884e-31
APLN	1.58802e-24	0.126334	0.875	0.863	3.69532e-20
ADGRL2	5.26021e-28	0.126369	0.69	0.657	1.22405e-23
EIF5A	2.05393e-63	0.126396	0.975	0.986	4.77949e-59
YWHAH	1.00425e-42	0.126716	0.912	0.924	2.33688e-38
IER2	6.28167e-31	0.127263	0.831	0.824	1.46174e-26
HIST1H4C	0.111116	0.127758	0.747	0.786	1
ZEB1	7.81963e-21	0.128034	0.95	0.973	1.81963e-16
TPM4	8.90046e-81	0.128415	0.983	0.991	2.07114e-76
S100A10	4.69917e-50	0.128718	0.984	0.99	1.0935e-45
NEK7	5.92178e-28	0.12881	0.816	0.811	1.378e-23
CENPE	4.40831e-22	0.128977	0.416	0.349	1.02581e-17
NRXN3	5.93908e-15	0.130253	0.483	0.444	1.38202e-10
DKK1	4.98572e-26	0.131699	0.68	0.641	1.16018e-21
TUBA1C	3.43521e-32	0.133232	0.94	0.956	7.99374e-28
KRT18	2.63743e-36	0.133471	0.951	0.968	6.13729e-32
AC022075.1	0.000128444	0.13353	0.275	0.254	1
PODXL	8.8607e-22	0.133683	0.902	0.929	2.06189e-17
MKI67	5.20459e-15	0.133837	0.364	0.308	1.21111e-10
TUBB6	2.07881e-52	0.13448	0.962	0.978	4.83739e-48
EFHD2	4.31034e-39	0.136339	0.926	0.945	1.00302e-34
KLF2	1.87702e-47	0.137549	0.526	0.434	4.36783e-43
TPM3	7.07035e-98	0.138636	0.986	0.991	1.64527e-93
DEF8	1.03515e-57	0.139757	0.917	0.936	2.4088e-53
TUBB4B	1.05816e-29	0.143667	0.918	0.933	2.46234e-25
PTGES3	3.47545e-60	0.143923	0.968	0.98	8.08737e-56
CDV3	9.14679e-53	0.144717	0.961	0.977	2.12846e-48
PTGR1	6.99877e-33	0.145275	0.823	0.82	1.62861e-28
FLRT2	1.49426e-13	0.145601	0.837	0.841	3.47714e-09
RASSF8	2.23407e-53	0.145967	0.875	0.868	5.19868e-49
PLOD2	6.17736e-35	0.146402	0.947	0.977	1.43747e-30
RAB3B	1.76173e-38	0.147099	0.854	0.858	4.09955e-34
TXNRD2	2.7223e-42	0.148358	0.895	0.911	6.33478e-38
MALAT1	1.01581e-25	0.151015	0.987	0.988	2.36379e-21
ANKRD1	5.42784e-22	0.151876	0.91	0.91	1.26306e-17
AC008568.1	9.72987e-12	0.153071	0.364	0.326	2.26414e-07
SLC9A3R2	1.09872e-65	0.153185	0.908	0.915	2.55673e-61
CENPF	6.13962e-20	0.153574	0.598	0.544	1.42869e-15
KITLG	2.56698e-52	0.154871	0.701	0.628	5.97336e-48
SERBP1	7.15773e-61	0.162595	0.974	0.983	1.6656e-56
ANXA1	6.76535e-53	0.167249	0.964	0.976	1.5743e-48
H2AFZ	6.75194e-65	0.168815	0.974	0.984	1.57118e-60
LIMA1	1.03032e-68	0.170654	0.804	0.774	2.39754e-64
SULT1B1	2.60355e-36	0.171979	0.651	0.603	6.05845e-32
SBDS	2.05552e-88	0.172198	0.901	0.909	4.7832e-84
HSPD1	2.02284e-46	0.173142	0.958	0.973	4.70715e-42
CKS2	1.64332e-39	0.175059	0.808	0.787	3.82401e-35
NPM1	1.27862e-50	0.176251	0.986	0.991	2.97535e-46
LDHA	3.1846e-58	0.176956	0.951	0.964	7.41057e-54
RGS4	3.81832e-65	0.178811	0.515	0.406	8.88523e-61
ECI2	1.15806e-39	0.180126	0.814	0.815	2.69481e-35
SSR3	5.58023e-112	0.184536	0.96	0.976	1.29852e-107
PECAM1	7.43167e-23	0.193234	0.873	0.886	1.72935e-18
NEAT1	1.42176e-19	0.196172	0.95	0.977	3.30843e-15
TMEM158	2.84263e-68	0.196497	0.541	0.426	6.61479e-64
HSP90AB1	1.85479e-98	0.208468	0.993	0.992	4.31611e-94
ODC1	5.22196e-118	0.212614	0.809	0.739	1.21515e-113
PRICKLE1	2.09738e-61	0.213035	0.771	0.705	4.88061e-57
COL8A1	2.10312e-31	0.217569	0.652	0.606	4.89396e-27
SLIT2	4.42628e-56	0.223739	0.796	0.759	1.03e-51
PLAT	3.49303e-39	0.234049	0.75	0.724	8.12829e-35
FABP4	0.383092	0.241746	0.691	0.723	1
NCL	7.46796e-75	0.252424	0.98	0.987	1.7378e-70
